# Supplementary material for: [12]aneN3-Conjugated AIEgens with two-photon imaging properties for synergistic gene/photodynamic therapy in vitro and in vivo
Source: Royal Society of Chemistry journal article supplement (doi:10.1039/d1tb02352g), 2022-01-01
Supplement: d1tb02352g1.pdf [file d1tb02352g1.pdf]

## Supporting Information

### **[12]aneN<sub>3</sub>-Conjugated AIEgens with Two-Photon Imaging Property for Synergistic Gene/Photodynamic Therapy *in Vitro* and *in Vivo***

*Xu-Ying Liu*<sup>a</sup>, *Jing-Bo Yang*<sup>a</sup>, *Cheng-Yan Wu*<sup>a</sup>, *Quan Tang*<sup>a</sup>, *Zhong-Lin Lu*<sup>a\*</sup> and  
*Lan Lin*<sup>b\*</sup>

<sup>a</sup> Key Laboratory of Radiopharmaceutics, Ministry of Education; College of Chemistry, Beijing Normal University, Beijing 100875, P. R. China.

<sup>b</sup> China National Institute for Food and Drug Control, Institute of Chemical Drug Control, No. 31 Huatuo St., Daxing District, Beijing, 102629, China.

E-mail: luzl@bnu.edu.cn; linlan@nifdc.org.cn; helan1961@aliyun.com

## Content

|                                                                                         |    |
|-----------------------------------------------------------------------------------------|----|
| 1. Experimental Section .....                                                           | 3  |
| 1.1 Synthesis of TTC-L-M-1/2/3/4/5/6.....                                               | 4  |
| 1.2 <i>In Vitro</i> and <i>in Vivo</i> Experiments .....                                | 10 |
| 2. Characterizations of TTC-L-M Derivatives .....                                       | 13 |
| 2.1. UV-Visible Spectra of the Compounds in Different Solvents.....                     | 13 |
| 2.2 Micelle Formation .....                                                             | 17 |
| 2.3 SEM, DLS and Zeta Measurements .....                                                | 18 |
| 2.4 EB Assay .....                                                                      | 20 |
| 2.5 Docking Assays and Gel Electrophoresis .....                                        | 21 |
| 2.6 DNA Release .....                                                                   | 23 |
| 2.7 Cell Cytotoxicity .....                                                             | 23 |
| 2.8 Gene Transfection Assays .....                                                      | 24 |
| 2.9 Tracing the Delivery of DNA .....                                                   | 29 |
| 2.10 ROS and PDT.....                                                                   | 32 |
| 2.11 Western Blot.....                                                                  | 34 |
| 2.12 <i>In vivo</i> imaging .....                                                       | 34 |
| 2.13 <i>In vivo</i> Antitumor Efficacy.....                                             | 35 |
| 3. $^1\text{H}$ , $^{13}\text{C}$ -NMR Spectra and HR-MS of Synthesized Compounds ..... | 37 |
| References.....                                                                         | 65 |

## 1. Experimental Section

**Materials and Instrumentation.** Unless otherwise specified, all the analytical pure solvents and chemicals were purchased from Macklin (Shanghai, China), and used without further purification. Anhydrous dichloromethane (DCM) and *N,N*-dimethyl formamide (DMF) were dried and purified under nitrogen by using standard methods. Electrophoresis-grade agarose, pUC-18 DNA, Gold View II, ethidium bromide (EB), lipase, ctDNA (calf thymus DNA), the luciferase assay kit, Hoechst 33342, Lyso-Tracker Blue and Annexin V-FITC Apoptosis Detection Kit were obtained from Solarbio Company (Beijing, China). pGL-3, EGFP and Cy5-DNA were obtained from Ruibiotec Co., Ltd. (Beijing, China). DOPE (Dioleoylphosphatidyl ethanolamine) and 3-(4,5-dimethylthiazol-2-yl)-2,5- diphenyl tetrazolium bromide (MTT) was purchased from Santa Cruz Biotechnology. Lipofectamine 2000 was purchased from Invitrogen (Life technologies, Mauricio Minotta). DCFH-DA was supplied by Beyotime Biotechnology (China). Plasmid expressing p53 and siLuc were supplied by Shanghai GenePharma Co. Ltd. (China). The concentrations of ctDNA were measured by recording absorptions at 260 nm and applying Lambert-Beer's Law (molar absorption coefficient  $\epsilon = 6600 \text{ M}^{-1}\text{cm}^{-1}$ ).

$^1\text{H}$  and  $^{13}\text{C}$ -NMR spectra were obtained on a JOEL spectrometer (400 and 600 MHz) and Bruker Avance III spectrometer (400 MHz) using  $\text{CDCl}_3$  and  $\text{DMSO}-d_6$  as solvent and calibrated using tetramethyl silane (TMS) as internal reference at 25 °C. High resolution mass spectra (HRMS) were recorded on a Waters LCT premier XE spectrometer (USA). Fluorescence spectra were measured on F-4600 FLSPECTROPHOTOMET. Agarose electrophoresis was performed using a BG-subMIDI submarine system (BayGene Biotech Company Limited, Beijing, China) and the electrophoresis images were obtained on a UVP EC3 visible imaging system using 254 nm UV light for visualization. Scanning electron microscopy (SEM) images were performed on a Hitachi S-4800 (Japan). Confocal fluorescence imaging was obtained with Nikon A1R MP multiphoton microscopy (Japan) with a 60 $\times$  oil-immersion objective lens. Flow cytometry assays were obtained on a CytoFLEX (Beckmancoulter, USA).

## 1.1 Synthesis of TTC-L-M-1/2/3/4/5/6

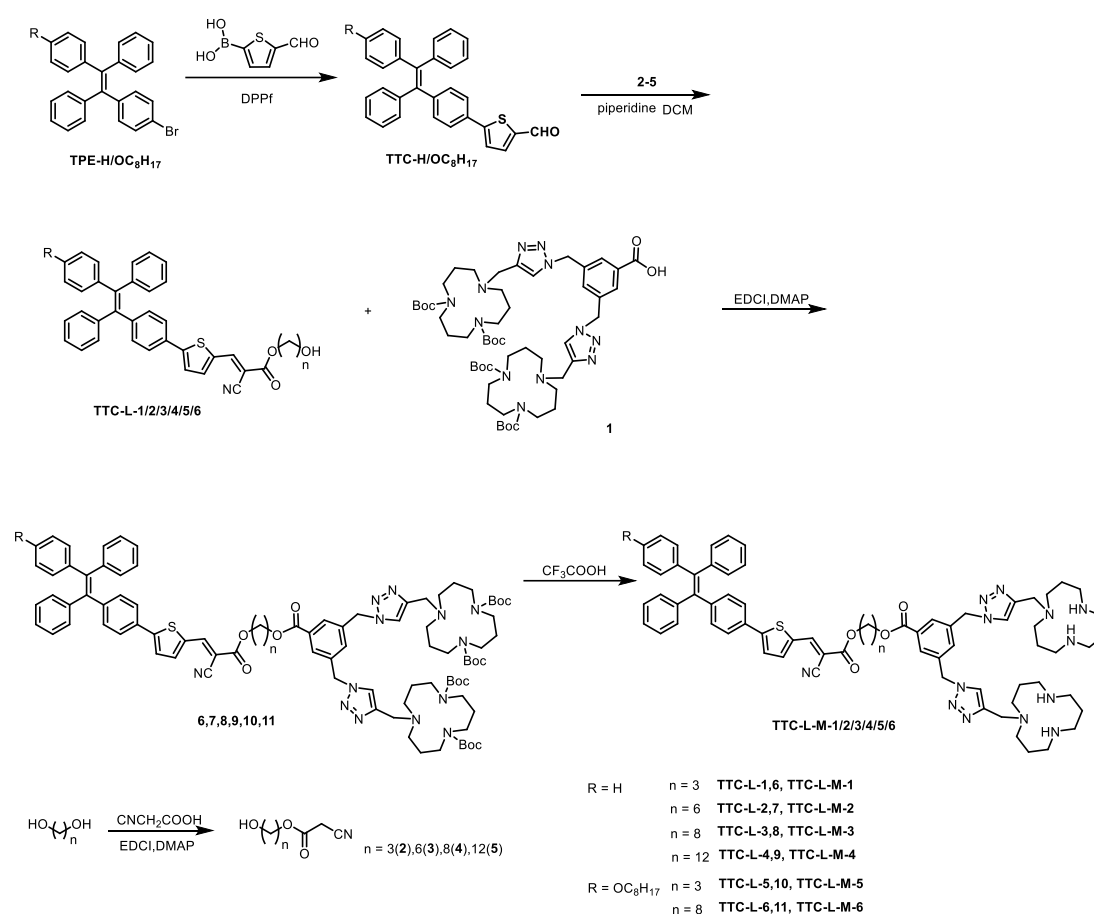

**Scheme S1.** Schematic Synthetic Route for TTC-L-M-1/2/3/4/5/6

### Synthesis of 2-5

Under argon atmosphere, malonic mononitrile (2.85 mmol, 1 equiv.) and diol (3.42 mmol, 1.2 equiv.) was added to 30 mL dry DCM, and EDCI (3.42 mmol, 1.2 equiv.) was added slowly at 0 °C, after that, DMAP (3.42 mmol, 1.2 equiv.) was added and the reaction was stirred at room temperature for overnight. After completion, washed with saturated NaCO<sub>3</sub> aqueous solution, and combined the organic layer, dried over anhydrous Na<sub>2</sub>SO<sub>4</sub> and concentrated under reduced pressure. Crude residue was purified by silica gel column was eluted with PE/EtOAc (v/v = 3:1 ~ 1:1), to give **2-5** as colorless oil or white solid in 40–52% yields.

**Compound 2:** 0.163 g, 1.14 mmol; Yield: 40%. <sup>1</sup>H NMR (CDCl<sub>3</sub>, 600 MHz) δ (ppm.) 4.37 (t, *J* = 6.2 Hz, 2H), 3.74 (t, *J* = 5.8 Hz, 2H), 3.62 (s, 2H), 3.46 (s, 1H), 2.01 – 1.86 (m, 2H). <sup>13</sup>C NMR (CDCl<sub>3</sub>, 101 MHz) δ (ppm.) 163.23, 113.10, 64.03, 58.92, 31.27, 24.83. ESI-MS: *m/z* calcd. [M+H]<sup>+</sup> for C<sub>6</sub>H<sub>9</sub>NO<sub>3</sub>, 143.06; found, 144.07

**Compound 3:** 0.248 g, 1.34 mmol; Yield: 47%. <sup>1</sup>H NMR (CDCl<sub>3</sub>, 600 MHz) δ(ppm.) 4.20 (t, *J* = 6.9 Hz, 2H), 3.63 (t, *J* = 6.8 Hz, 2H), 3.44 (s, 2H), 1.69 (m, 2H), 1.57 (m, 2H), 1.40 (m, 4H). <sup>13</sup>C NMR (CDCl<sub>3</sub>, 101 MHz) δ (ppm.) 163.04, 113.13, 67.08, 62.79, 32.57, 28.35, 25.64, 25.41, 24.83, 24.79. ESI-MS: *m/z* calcd. [M+H]<sup>+</sup> for C<sub>9</sub>H<sub>15</sub>NO<sub>3</sub>, 185.11; found, 186.10.

**Compound 4:** 0.256 g, 1.20 mmol; Yield: 42%. <sup>1</sup>H NMR (CDCl<sub>3</sub>, 600 MHz) δ (ppm.) 4.17 (t, *J* = 6.8 Hz, 2H), 3.60 (t, *J* = 6.8 Hz, 2H), 3.43 (s, 2H), 1.64 (m, 2H), 1.57 – 1.50 (m, 2H), 1.31 (m, 8H). <sup>13</sup>C NMR (CDCl<sub>3</sub>, 101 MHz) δ (ppm.) 163.06, 113.15, 67.17, 63.02, 32.76, 29.26, 29.12, 28.36, 25.67, 24.83. ESI-MS: *m/z* calcd. [M+H]<sup>+</sup> for C<sub>11</sub>H<sub>19</sub>NO<sub>3</sub>, 213.14; found, 214.13.

**Compound 5:** 0.399 g, 1.48 mmol; Yield: 52%. <sup>1</sup>H NMR (CDCl<sub>3</sub>, 600 MHz) δ (ppm.) 4.20 (t, *J* = 5.7 Hz, 2H), 3.63 (t, *J* = 5.9 Hz, 2H), 3.44 (s, 2H), 1.73 – 1.62 (m, 2H), 1.56 (m, 1H), 1.27 (m, 16H). <sup>13</sup>C NMR (CDCl<sub>3</sub>, 101 MHz) δ (ppm.) 163.04, 113.10, 67.24, 63.17, 32.87, 29.56, 29.20, 25.78, 24.83. ESI-MS: *m/z* calcd. [M+H]<sup>+</sup> for C<sub>16</sub>H<sub>27</sub>NO<sub>3</sub>, 269.20; found, 270.20.

### **Synthesis of TTC Derivatives**

Compound **TPE-H/OC<sub>8</sub>H<sub>17</sub>** were obtained according to literature method<sup>[1,2]</sup>.

Under argon atmosphere, compound **TPE** (1.2 mmol, 1 equiv.), (5-formylthiophen-2-yl) boronic acid (2.4 mmol, 2 equiv.) and Dppf (2.4 mmol, 2 equiv.) was added to a solution of dimethoxyethane (DME): 2 M Na<sub>2</sub>CO<sub>3</sub> (3:1, 100 mL). And the resultant mixture was heated to reflux for 24 h. After completion, reaction was quenched with water and extracted with DCM. The combined organic layer was washed with water, dried over anhydrous sodium sulfate, and evaporated. Crude residue was purified by silica gel column was eluted with PE/EtOAc (v/v =40:1 ~ 10:1), to give **TTC** as a yellow solid in 75-87% yield.

**Compound TTC-H:** 0.398 g, 0.9 mmol; Yield: 75%. <sup>1</sup>H NMR (CDCl<sub>3</sub>, 400 MHz) δ (ppm.) 9.85 (s, 1H), 7.69 (d, *J* = 3.9 Hz, 1H), 7.41 (d, *J* = 8.2 Hz, 2H), 7.32 (d, *J* = 4.0 Hz, 1H), 7.17 – 6.98 (m, 17H).

**Compound TTC-OC<sub>8</sub>H<sub>17</sub>:** 0.593 g, 1.04 mmol; Yield: 87%. <sup>1</sup>H NMR (CDCl<sub>3</sub>, 400 MHz) δ (ppm.) 9.85 (s, 1H), 7.69 (d, *J* = 4.0 Hz, 1H), 7.42 (d, *J* = 8.3 Hz, 2H), 7.33 (d, *J* = 3.9 Hz, 1H), 7.08 (m, 8H), 7.00 (m, 4H), 6.94 (d, *J* = 8.7 Hz, 2H), 6.64 (d, *J* = 8.7 Hz, 2H), 3.87 (t, *J* = 6.6 Hz, 2H), 1.77 – 1.67 (m, 2H), 1.41 (m, 2H), 1.27 (m, 8H), 0.86 (t, *J* = 6.9 Hz, 3H).

### **Synthesis of TTC-L Derivatives**

Under argon atmosphere, compound **TTC** (0.41 mmol, 1 equiv.), compound **2-5** and piperidine (1.2 mmol, 3 equiv) was added to 20mL CH<sub>3</sub>CN. The reaction mixture was heated to reflux for overnight and cooled to room temperature. The pH value of the aqueous phase was adjusted to 2.0–3.0 with HCl (0.1 M). The reaction mixture was extracted with DCM. The extract was then dried over Na<sub>2</sub>SO<sub>4</sub> and filtered. After evaporation at a reduced pressure, crude residue was purified by silica gel column was eluted with PE/EtOAc (v/v =5:1 ~ 2:1), to give **TTC-L-1/2/3/4/5/6** as a yellow solid in 42-95% yield.

**TTC-L-1:** 0.098 g, 0.17 mmol; Yield: 42%. <sup>1</sup>H NMR (CDCl<sub>3</sub>, 600 MHz) δ (ppm.) 8.26 (s, 1H), 7.71 (d, *J* = 3.8 Hz, 1H), 7.42 (d, *J* = 8.0 Hz, 2H), 7.33 (d, *J* = 3.7 Hz, 1H), 7.15 – 6.96 (m, 17H), 4.45 (t, *J* = 6.2 Hz, 2H), 3.78 (t, *J* = 6.2 Hz, 2H), 2.01 – 1.96 (m, 2H). <sup>13</sup>C NMR (CDCl<sub>3</sub>, 101 MHz) δ (ppm.) 163.45, 154.93, 146.93, 145.70, 143.45, 143.28, 142.23, 139.97, 139.51, 134.71, 132.30, 131.45, 131.38, 130.58, 128.03, 127.95, 127.79, 126.99, 126.83, 125.84, 124.32, 116.13, 97.34, 77.49, 77.17, 76.85, 63.38, 59.04, 31.65. ESI-MS: *m/z* calcd. [M+H]<sup>+</sup> for C<sub>37</sub>H<sub>29</sub>NO<sub>3</sub>S, 567.19; found, 568.22

**TTC-L-2:** 0.150 g, 0.25 mmol; Yield: 60%. <sup>1</sup>H NMR (CDCl<sub>3</sub>, 600 MHz) δ(ppm.) 8.25 (s, 1H), 7.70 (d, *J* = 4.7 Hz, 2H), 7.42 (d, *J* = 7.7 Hz, 2H), 7.33 (d, *J* = 4.5 Hz, 1H), 7.16 – 7.08 (m, 10H), 7.07 – 7.00 (m, 7H), 4.29 (t, *J* = 6.5 Hz, 2H), 3.65 (t, *J* = 6.0 Hz, 2H), 1.76 (m, 2H), 1.59 (m, 2H), 1.53 – 1.31 (m, 4H). <sup>13</sup>C NMR (CDCl<sub>3</sub>, 151 MHz) δ (ppm.) 163.17, 154.69, 146.62, 145.64, 143.47, 143.44, 143.30, 142.22, 139.99, 139.13, 134.80, 132.28, 132.22, 131.44, 131.37, 130.64, 128.01, 127.98, 127.92, 127.77, 126.96, 126.92, 126.81, 126.75, 125.82, 124.26, 116.13, 97.81, 66.50, 62.90, 32.67, 28.57, 25.80, 25.47, 0.07. ESI-MS: *m/z* calcd. [M+H]<sup>+</sup> for C<sub>40</sub>H<sub>35</sub>NO<sub>3</sub>S, 609.23; found, 610.23

**TTC-L-3:** 0.212 g, 0.33 mmol; Yield: 81%. <sup>1</sup>H NMR (CDCl<sub>3</sub>, 600 MHz) δ (ppm.) 8.25 (s, 1H), 7.70 (d, *J* = 3.8 Hz, 1H), 7.42 (d, *J* = 8.0 Hz, 2H), 7.33 (d, *J* = 3.8 Hz, 1H), 7.16 – 6.98 (m, 17H), 4.28 (t, *J* = 6.8 Hz, 2H), 3.64 (t, *J* = 6.6 Hz, 2H), 1.73 (m, 2H), 1.62 (m, 2H), 1.42 (m, 2H), 1.35 (m, 6H). <sup>13</sup>C NMR (CDCl<sub>3</sub>, 101 MHz) δ (ppm.) 163.18, 154.64, 146.65, 145.62, 143.47, 143.30, 142.20, 139.99, 139.29, 134.78, 132.29, 131.46, 131.39, 130.63, 128.03, 127.95, 127.79, 126.98, 126.83, 125.82, 124.28, 116.13, 97.78, 77.53, 77.23, 76.90, 66.61, 63.01, 32.81, 29.30, 29.19, 28.58, 25.79, 25.72. ESI-MS: *m/z* calcd. [M+H]<sup>+</sup> for C<sub>42</sub>H<sub>39</sub>NO<sub>3</sub>S, 637.27; found, 638.26

**TTC-L-4:** 0.270 g, 0.39 mmol; Yield: 95%. <sup>1</sup>H NMR (CDCl<sub>3</sub>, 600 MHz) δ (ppm.) 8.25 (s, 1H), 7.70 (d, *J* = 3.9 Hz, 1H), 7.53 (d, *J* = 4.1 Hz, 1H), 7.42 (d, *J* = 8.3 Hz, 1H), 7.33 (d, *J* = 4.0 Hz, 1H), 7.14 – 7.07 (m, 10H), 7.07 – 6.97 (m, 7H), 4.27 (t, *J* = 6.6 Hz, 2H), 3.63 (t, *J* = 6.6 Hz, 2H), 1.73 (m, 2H), 1.55 (m, 2H), 1.40 (m, 2H), 1.33 (m, 2H), 1.27 (s, 12H). <sup>13</sup>C NMR (CDCl<sub>3</sub>, 151 MHz) δ (ppm.) 163.18, 154.60, 146.54, 145.61, 143.48, 143.30, 143.12, 142.21, 140.00, 139.05, 134.82, 132.27, 132.21, 131.45, 131.37, 130.99, 130.66, 128.93, 127.98, 127.92, 127.77, 126.96, 126.92, 126.80, 126.75, 125.81, 124.25, 116.10, 97.94, 66.65, 63.19, 32.90, 29.79, 29.59, 29.49, 29.26, 28.63, 25.87, 22.78, 19.27, 14.20, 0.07. ESI-MS: *m/z* calcd. [M+H]<sup>+</sup> for C<sub>46</sub>H<sub>47</sub>NO<sub>3</sub>S, 693.33; found, 694.68

**TTC-L-5:** 0.142 g, 0.21 mmol; Yield: 50%. <sup>1</sup>H NMR (CDCl<sub>3</sub>, 600 MHz) δ (ppm.) 8.28 (s, 1H), 7.73 (d, *J* = 4.0 Hz, 1H), 7.45 (d, *J* = 7.6 Hz, 2H), 7.36 (d, *J* = 3.9 Hz, 1H), 7.14 – 7.07 (m, 8H), 7.06 – 7.00 (m, 4H), 6.95 (d, *J* = 8.0 Hz, 2H), 6.66 (d, *J* = 7.9 Hz, 2H), 4.47 (t, *J* = 5.9 Hz, 2H), 3.88 (t, *J* = 6.6 Hz, 2H), 3.79 (t, *J* = 5.8 Hz, 2H), 2.03 – 1.97 (m, 2H), 1.79 – 1.70 (m, 2H), 1.41 (m, 2H), 1.36 – 1.28 (m, 8H), 0.87 (t, *J* = 6.6 Hz, 3H). <sup>13</sup>C NMR (CDCl<sub>3</sub>, 101 MHz) δ (ppm.) 163.47, 157.99, 155.07, 146.94, 146.16, 146.08, 143.76, 143.67, 143.58, 141.94, 139.50, 138.93, 135.58, 135.54, 134.63, 132.62, 132.33, 131.50, 131.49, 131.47, 131.03, 130.35, 130.34, 128.94, 128.01, 127.96, 127.72, 126.91, 126.63, 125.78, 124.25, 116.13, 113.68, 97.24, 67.92, 63.34, 59.05, 31.90, 29.47, 29.32, 26.15, 22.75, 14.21. ESI-MS: *m/z* calcd. [M+H]<sup>+</sup> for C<sub>45</sub>H<sub>45</sub>NO<sub>4</sub>S, 695.31; found, 696.41

**TTC-L-6:** 0.263 g, 0.34 mmol; Yield: 84%. <sup>1</sup>H NMR (CDCl<sub>3</sub>, 400 MHz) δ (ppm.) 8.25 (s, 1H), 7.71 (d, *J* = 4.0 Hz, 1H), 7.44 (d, *J* = 8.4 Hz, 2H), 7.34 (d, *J* = 4.1 Hz, 1H), 7.11 – 7.06 (m, 8H), 7.04 – 6.98 (m, 4H), 6.94 (d, *J* = 8.7 Hz, 2H), 6.65 (d, *J* = 8.7 Hz, 2H), 4.28 (t, *J* = 6.7 Hz, 2H), 3.87 (t, *J* = 6.6 Hz, 2H), 3.63 (t, *J* = 6.6 Hz, 2H), 1.79 – 1.67 (m, 2H), 1.56 (m, 2H), 1.43 – 1.36 (m, 8H), 1.28 (m, 10H), 0.86 (t, *J* = 6.9 Hz, 3H). <sup>13</sup>C NMR (CDCl<sub>3</sub>, 101 MHz) δ (ppm.) 163.20, 158.14, 154.79, 146.63, 146.06,

145.99, 143.75, 143.67, 143.58, 141.93, 139.19, 138.94, 135.58, 134.70, 132.61, 132.31, 131.50, 131.48, 131.46, 130.40, 130.39, 127.99, 127.94, 127.87, 127.70, 126.89, 126.61, 125.87, 125.75, 124.18, 116.16, 116.14, 113.67, 97.71, 67.91, 66.58, 63.09, 33.99, 32.82, 31.89, 29.47, 29.37, 29.26, 29.17, 28.57, 26.14, 25.01, 22.74, 14.20. ESI-MS:  $m/z$  calcd.  $[M-H]^-$  for  $C_{50}H_{55}NO_4S$ , 765.39; found, 764.24

**Synthesis of target compound TTC-L-M-1/2/3/4/5/6<sup>[2]</sup>.**

Under argon atmosphere, compound **1** (0.13 mmol, 1 equiv.) and EDCI (0.16 mmol, 1.2 equiv.) was added to 15mL dry DCM, and compounds **TTC-L** derivatives (3.42 mmol, 1.2 equiv.) was added slowly at 0 °C, after that, DMAP (0.16 mmol, 1.2 equiv.) was added and the reaction was stirred at room temperature for overnight. After completion, washed with saturated  $NaCO_3$  aqueous solution, and combined the organic layer, dried over anhydrous  $Na_2SO_4$  and concentrated under reduced pressure. Crude residue was purified by silica gel column was eluted with DCM/MeOH (v/v =40:1 ~ 15:1), to give **6-11** as a yellow solid in 40-56% yield. The obtained compounds **6-11** were subsequently dissolved in 5 mL anhydrous DCM then  $CF_3COOH$  was added dropwise to the mixture solution. After stirring for 30 min at room temperature, a large amount of yellow precipitates was obtained. The solid collected by filtering and then washed with ether for several times, and then the solid were dried in vacuo to give the target compounds **TTC-L-M-1/2/3/4/5/6** as yellow solid in 75-90% yields.

**Compound 6:** 0.117 g, 0.07 mmol; Yield: 56%.  $^1H$  NMR ( $CDCl_3$ , 400 MHz)  $\delta$  (ppm.) 8.25 (s, 1H), 7.90 (s, 2H), 7.71 (d,  $J = 4.0$  Hz, 1H), 7.47 – 7.32 (m, 6H), 7.17 – 7.08 (m, 11H), 7.06 – 7.00 (m, 6H), 5.53 (s, 4H), 4.45 (dt,  $J = 12.0, 6.0$  Hz, 4H), 3.77 (s, 4H), 3.31 (m, 16H), 2.43 (s, 8H), 2.27 – 2.17 (m, 2H), 1.85 (dd,  $J = 13.0, 6.1$  Hz, 12H), 1.44 (s, 36H).  $^{13}C$  NMR ( $CDCl_3$ , 101 MHz)  $\delta$  (ppm.) 171.22, 165.11, 163.01, 156.40, 146.99, 144.44, 143.42, 139.92, 136.70, 134.61, 132.30, 131.36, 130.51, 129.23, 128.00, 127.76, 126.81, 125.82, 124.35, 122.60, 116.02, 97.15, 79.36, 60.47, 53.28, 49.77, 46.80, 45.50, 43.90, 28.58, 26.20, 21.14. HRMS-ESI:  $m/z$  calcd.  $[M+2H]^{2+}$  for  $C_{90}H_{113}N_{13}O_{12}S$ , 1601.8498; found, 1601.8506

**Compound 7:** 0.105 g, 0.06 mmol; Yield: 49%.  $^1H$  NMR ( $CDCl_3$ , 400 MHz)  $\delta$ (ppm.) 8.26 (s, 1H), 7.91 (s, 2H), 7.72 (d,  $J = 4.1$  Hz, 1H), 7.43 (d,  $J = 8.3$  Hz, 3H), 7.38 (s, 1H), 7.34 (s, 2H), 7.16 – 7.08 (m, 10H), 7.07 – 7.00 (m, 7H), 5.54 (s, 4H), 4.31 (q,  $J = 6.5$  Hz, 4H), 3.78 (s, 2H), 3.32 (m, 18H), 2.43 (m, 6H), 1.83 (m, 18H), 1.48 (m, 4H), 1.44 (s, 36H).  $^{13}C$  NMR ( $CDCl_3$ , 101 MHz)  $\delta$  (ppm.) 165.31, 163.17, 156.44, 154.75, 146.70, 145.67, 143.45, 143.28, 142.22, 139.96, 139.32, 136.60, 134.74, 132.29, 131.44, 131.38, 130.60, 129.24, 128.01, 127.93, 127.78, 126.96, 126.82, 125.81, 124.30, 122.61, 116.13, 97.65, 79.41, 77.44, 77.33, 77.12, 76.81, 66.30, 65.58, 53.36, 49.76, 46.83, 45.50, 43.92, 31.68, 29.78, 28.59, 26.18, 25.65, 25.57, 22.74, 14.22, 0.09. HRMS-ESI:  $m/z$  calcd.  $[M+2H]^{2+}$  for  $C_{93}H_{119}N_{13}O_{12}S$ , 1643.8968; found, 1643.8966

**Compound 8:** 0.084 g, 0.05 mmol; Yield: 40%.  $^1H$  NMR ( $CDCl_3$ , 600 MHz)  $\delta$  (ppm.) 8.24 (s,1H), 7.89 (s, 2H), 7.70 (d,  $J = 4.1$  Hz, 1H), 7.41 (d,  $J = 8.4$  Hz, 2H), 7.35 (s, 2H), 7.33 (d,  $J = 4.0$  Hz, 1H), 7.31 (s, 1H), 7.13 – 7.00 (m, 17H), 5.53 (s, 4H), 4.28 (q,  $J = 6.7$  Hz, 4H), 3.77 (s, 2H), 3.76 (s, 2H), 3.30 (m, 16H), 2.42 (m, 8H), 1.86 (d,  $J = 6.6$  Hz, 2H), 1.83 – 1.80 (m, 10H), 1.73 (d,  $J = 6.9$  Hz, 2H), 1.43 (m, 46H).  $^{13}C$  NMR ( $CDCl_3$ , 101 MHz)  $\delta$  (ppm.) 172.46, 166.60, 157.68, 155.92, 147.87, 145.80, 144.74,

144.58, 143.52, 141.28, 140.46, 137.94, 136.06, 133.57, 132.72, 132.65, 130.45, 129.29, 129.22, 129.06, 128.25, 128.10, 127.09, 125.59, 123.84, 80.64, 67.06, 61.74, 54.63, 51.20, 48.16, 46.84, 45.24, 30.43, 29.90, 28.54, 27.59, 27.20, 27.11, 22.41, 15.58. HRMS-ESI:  $m/z$  calcd.  $[M+2H]^{2+}$  for  $C_{95}H_{123}N_{13}O_{12}S$ , 1671.9281; found, 1671.9280

**Compound 9:** 0.110 g, 0.06 mmol; Yield: 49%.  $^1H$  NMR ( $CDCl_3$ , 600 MHz)  $\delta$  (ppm.) 8.24 (s, 1H), 7.88 (s, 2H), 7.70 (d,  $J = 4.0$  Hz, 1H), 7.42 (d,  $J = 8.2$  Hz, 2H), 7.35 (s, 1H), 7.33 (d,  $J = 4.1$  Hz, 2H), 7.14 – 6.97 (m, 17H), 5.53 (s, 4H), 4.27 (dt,  $J = 6.9, 3.4$  Hz, 4H), 3.77 (s, 2H), 3.44 – 3.09 (m, 18H), 2.42 (m, 6H), 1.84 (m, 12H), 1.73 (t,  $J = 7.0$  Hz, 6H), 1.43 (s, 40H), 1.28 (m, 12H).  $^{13}C$  NMR ( $CDCl_3$ , 101 MHz)  $\delta$  (ppm.) 165.34, 163.15, 156.47, 154.58, 146.53, 145.60, 143.45, 143.29, 142.21, 139.99, 139.09, 136.53, 134.79, 132.26, 132.21, 131.43, 131.36, 130.96, 130.64, 129.57, 129.35, 128.88, 127.99, 127.91, 127.76, 126.95, 126.80, 126.75, 125.79, 124.26, 116.10, 97.91, 79.61, 68.23, 67.85, 66.63, 65.83, 53.51, 49.15, 47.18, 45.52, 44.31, 39.00, 34.02, 32.00, 30.65, 29.76, 29.61, 29.34, 29.06, 28.73, 28.57, 25.02, 24.07, 23.05, 14.19, 11.17, 1.09. HRMS-ESI:  $m/z$  calcd.  $[M+2H]^{2+}$  for  $C_{99}H_{131}N_{13}O_{12}S$ , 1727.9907; found, 1727.9906

**Compound 10:** 0.103 g, 0.06 mmol; Yield: 46%.  $^1H$  NMR ( $CDCl_3$ , 400 MHz)  $\delta$  (ppm.) 8.25 (d,  $J = 4.9$  Hz, 1H), 7.90 (s, 2H), 7.71 (dd,  $J = 8.0, 4.0$  Hz, 1H), 7.49 – 7.32 (m, 6H), 7.16 – 7.08 (m, 7H), 7.07 – 7.00 (m, 5H), 6.92 (dd,  $J = 15.8, 8.6$  Hz, 2H), 6.63 (dd,  $J = 12.4, 8.7$  Hz, 2H), 5.54 (s, 4H), 4.45 (m, 4H), 3.87 (m, 2H), 3.78 (s, 4H), 3.31 (s, 16H), 2.44 (s, 7H), 2.26 – 2.18 (m, 2H), 1.84 (m, 12H), 1.77 – 1.68 (m, 2H), 1.43 (s, 38H), 1.27 (m, 8H), 0.87 (t,  $J = 5.0$  Hz, 3H).  $^{13}C$  NMR ( $CDCl_3$ , 101 MHz)  $\delta$  (ppm.) 171.13, 165.01, 162.93, 157.89, 156.31, 146.90, 144.25, 143.63, 141.88, 136.57, 135.43, 134.44, 132.50, 132.23, 131.81, 131.63, 131.37, 129.14, 127.83, 126.78, 126.51, 125.78, 125.66, 124.19, 122.58, 113.76, 113.57, 96.96, 79.30, 67.81, 62.92, 60.37, 53.19, 49.57, 45.39, 43.85, 31.78, 29.35, 29.26, 29.19, 28.48, 26.03, 22.63, 21.03, 14.18. HRMS-ESI:  $m/z$  calcd.  $[M+2H]^{2+}$  for  $C_{98}H_{129}N_{13}O_{13}S$ , 1729.9700; found, 1729.9698

**Compound 11:** 0.105 g, 0.06 mmol; Yield: 45%.  $^1H$  NMR ( $CDCl_3$ , 400 MHz)  $\delta$  (ppm.) 8.24 (d,  $J = 4.0$  Hz, 1H), 7.88 (s, 2H), 7.70 (dd,  $J = 7.2, 4.2$  Hz, 1H), 7.42 (dd,  $J = 15.5, 8.4$  Hz, 2H), 7.36 – 7.30 (m, 4H), 7.10 (m, 7H), 7.03 (m, 5H), 6.91 (dd,  $J = 15.0, 8.7$  Hz, 2H), 6.63 (dd,  $J = 12.1, 8.8$  Hz, 2H), 5.53 (s, 4H), 4.28 (dd,  $J = 11.7, 6.4$  Hz, 4H), 3.86 (t,  $J = 5.5$  Hz, 2H), 3.76 (s, 4H), 3.30 (s, 16H), 2.42 (t,  $J = 5.9$  Hz, 8H), 1.92 (d,  $J = 9.0$  Hz, 6H), 1.86 – 1.79 (m, 10H), 1.71 (d,  $J = 7.2$  Hz, 6H), 1.57 (s, 3H), 1.43 (s, 40H), 1.38 (m, 4H), 1.32 (m, 2H), 1.27 (m, 6H), 0.87 (t,  $J = 4.9$  Hz, 3H).  $^{13}C$  NMR ( $CDCl_3$ , 151 MHz)  $\delta$  (ppm.) 171.17, 165.29, 163.14, 156.89, 156.36, 146.58, 144.48, 143.73, 141.92, 139.16, 136.60, 135.55, 134.66, 132.57, 132.28, 131.43, 130.36, 129.14, 127.97, 127.68, 126.86, 126.59, 125.72, 124.19, 122.51, 116.10, 113.67, 97.69, 79.33, 65.75, 60.43, 53.31, 49.87, 46.82, 45.51, 43.90, 34.04, 31.86, 30.98, 29.35, 28.72, 28.67, 28.63, 28.61, 28.60, 28.57, 28.54, 28.53, 26.11, 25.72, 25.02, 22.70, 21.10, 14.26. HRMS-ESI:  $m/z$  calcd.  $[M+2H]^{2+}$  for  $C_{103}H_{139}N_{13}O_{13}S$ , 1800.0496; found, 1800.0480

**Compound TTC-L-M-1:** 0.063 g, 0.05 mmol; Yield: 75%.  $^1H$  NMR ( $CD_3OD$ , 600 MHz)  $\delta$  (ppm.) 9.41 (s, 4H), 8.50 (s, 1H), 8.15 (s, 2H), 7.99 (d,  $J = 4.4$  Hz, 1H), 7.81 (s, 2H), 7.70 (d,  $J = 4.4$  Hz, 1H), 7.55 (s, 2H), 7.16 – 6.91 (m, 18H), 5.64 (s, 4H), 4.36 (t,  $J = 4.9$  Hz, 4H), 3.73 (m, 4H), 3.13 (m, 4H), 3.04 (s, 12H), 2.10 (m, 2H), 2.04 (m,



5H), 1.99 (m, 2H), 1.97 (m, 1H), 1.93 (s, 6H), 1.89 (m, 7H). <sup>13</sup>C NMR (DMSO, 151 MHz) δ (ppm.) 179.79, 172.50, 165.53, 162.77, 153.66, 147.79, 145.43, 143.47, 143.45, 143.25, 142.74, 142.11, 140.24, 138.16, 134.90, 132.29, 131.27, 131.21, 131.15, 131.12, 130.75, 128.74, 128.56, 128.52, 128.39, 127.46, 127.33, 127.27, 126.28, 125.92, 125.38, 116.52, 97.29, 63.45, 62.52, 52.51, 36.15, 31.84, 28.13, 24.41, 24.14, 21.64. HRMS-ESI: *m/z* calcd. [M+2H]<sup>2+</sup> for C<sub>70</sub>H<sub>81</sub>N<sub>13</sub>O<sub>4</sub>S, 1201.6401; found, 1201.6400

**Compound TTC-L-M-2:** 0.062 g, 0.05 mmol; Yield: 83%. <sup>1</sup>H NMR (DMSO, 600 MHz) δ (ppm.) 8.88 (s, 5H), 8.49 (s, 1H), 8.17 (s, 2H), 8.00 (s, 1H), 7.71 (m, 3H), 7.55 (d, *J* = 7.9 Hz, 2H), 7.50 (s, 1H), 7.19 – 7.08 (m, 9H), 7.04 (d, *J* = 8.1 Hz, 2H), 7.02 – 6.89 (m, 6H), 5.65 (s, 4H), 4.22 (t, *J* = 6.6 Hz, 4H), 3.69 (s, 4H), 3.49 – 3.16 (m, 11H), 3.08 (m, 12H), 2.03 (s, 2H), 1.80 (s, 7H), 1.66 (s, 6H), 1.38 (s, 4H). <sup>13</sup>C NMR (DMSO, 151 MHz) δ (ppm.) 165.55, 162.82, 158.88, 158.67, 153.60, 147.73, 145.45, 143.46, 143.25, 142.70, 142.13, 140.22, 138.09, 134.91, 132.31, 131.38, 131.27, 131.22, 131.15, 130.74, 128.56, 128.52, 128.40, 127.45, 127.34, 126.26, 125.90, 125.41, 116.54, 97.35, 66.40, 65.47, 52.55, 43.97, 40.49, 40.35, 40.21, 40.07, 39.93, 39.79, 39.66, 28.55, 28.42, 25.46, 25.41, 21.67. HRMS-ESI: *m/z* calcd. [M+2H]<sup>2+</sup> for C<sub>73</sub>H<sub>87</sub>N<sub>13</sub>O<sub>4</sub>S, 1243.6871; found, 1243.6870

**Compound TTC-L-M-3:** 0.050 g, 0.04 mmol; Yield: 79%. <sup>1</sup>H NMR (CD<sub>3</sub>OD, 400 MHz) δ (ppm.) 8.36 (s, 1H), 8.09 (s, 1H), 7.90 (d, *J* = 8.5 Hz, 2H), 7.80 (d, *J* = 3.8 Hz, 1H), 7.56 (s, 1H), 7.47 (m, 3H), 7.16 – 6.91 (m, 18H), 5.68 (s, 4H), 4.27 (m, 4H), 3.84 (s, 2H), 3.43 (s, 2H), 3.36 (s, 8H), 3.26 (s, 6H), 3.12 (t, *J* = 6.7 Hz, 1H), 2.81 (s, 4H), 2.30 (s, 3H), 2.15 (m, 4H), 2.10 – 2.03 (m, 9H), 1.73 (m, 2H). <sup>13</sup>C NMR (CD<sub>3</sub>OD, 151 MHz) δ (ppm.) 165.55, 162.87, 154.14, 146.71, 145.59, 143.46, 143.26, 142.27, 140.49, 140.10, 137.09, 134.70, 132.08, 131.78, 131.10, 131.05, 130.98, 130.70, 128.70, 127.71, 127.66, 127.48, 126.67, 126.52, 125.41, 124.55, 115.80, 97.24, 66.16, 65.39, 52.97, 51.52, 48.34, 48.13, 47.91, 47.70, 47.49, 47.27, 47.06, 45.38, 44.71, 43.28, 28.70, 28.34, 28.21, 27.38, 25.56, 22.18, 21.33, 20.04. HRMS-ESI: *m/z* calcd. [M+2H]<sup>2+</sup> for C<sub>75</sub>H<sub>91</sub>N<sub>13</sub>O<sub>4</sub>S, 1271.7146; found, 1271.7182

**Compound TTC-L-M-4:** 0.072 g, 0.05 mmol; Yield: 90%. <sup>1</sup>H NMR (DMSO, 600 MHz) δ (ppm.) 8.86 (s, 5H), 8.50 (s, 1H), 8.17 (s, 2H), 8.01 (s, 1H), 7.70 (m, 3H), 7.54 (d, *J* = 8.1 Hz, 2H), 7.51 (s, 1H), 7.12 (m, 10H), 7.03 (d, *J* = 7.8 Hz, 2H), 7.02 – 6.85 (m, 5H), 5.66 (s, 4H), 4.19 (q, *J* = 6.9 Hz, 4H), 3.69 (s, 4H), 3.35 (m, 6H), 3.08 (m, 14H), 2.51 (m, 6H), 2.03 (m, 2H), 1.80 (m, 10H), 1.62 (m, 6H), 1.29 (m, 4H), 1.22 (m, 12H). <sup>13</sup>C NMR (DMSO, 151 MHz) δ (ppm.) 165.54, 162.81, 158.83, 158.62, 153.58, 147.71, 145.43, 143.46, 143.25, 142.68, 142.11, 140.23, 134.92, 132.30, 131.27, 131.22, 131.16, 128.55, 128.52, 128.47, 128.39, 127.45, 127.33, 126.25, 125.88, 116.52, 97.39, 66.48, 65.55, 65.45, 52.55, 44.00, 42.76, 42.37, 40.50, 40.36, 40.22, 40.08, 39.94, 39.80, 39.66, 29.51, 29.48, 29.44, 29.18, 29.11, 28.67, 28.52, 25.86, 25.76, 15.70. HRMS-ESI: *m/z* calcd. [M+2H]<sup>2+</sup> for C<sub>79</sub>H<sub>99</sub>N<sub>13</sub>O<sub>4</sub>S, 1327.7810; found, 1327.7808

**Compound TTC-L-M-5:** 0.064 g, 0.05 mmol; Yield: 80%. <sup>1</sup>H NMR (DMSO, 600 MHz) δ (ppm.) 8.54 (d, *J* = 6.8 Hz, 1H), 8.18 (s, 2H), 8.03 (dd, *J* = 9.1, 4.2 Hz, 1H), 7.84 (s, 2H), 7.74 (dd, *J* = 13.0, 4.0 Hz, 1H), 7.59 (dd, *J* = 25.4, 8.1 Hz, 2H), 7.45 (s,

1H), 7.20 – 7.11 (m, 6H), 7.08 (d,  $J = 8.2$  Hz, 1H), 7.06 – 7.01 (m, 3H), 7.00 – 6.95 (m, 2H), 6.90 (d,  $J = 8.6$  Hz, 1H), 6.85 (d,  $J = 8.6$  Hz, 1H), 6.72 (d,  $J = 8.7$  Hz, 1H), 6.68 (d,  $J = 8.7$  Hz, 1H), 5.69 (s, 4H), 5.29 (s, 2H), 4.40 (d,  $J = 6.0$  Hz, 4H), 3.86 (t,  $J = 6.4$  Hz, 2H), 3.77 (s, 4H), 2.93 (dt,  $J = 144.8, 42.8$  Hz, 14H), 2.13 (t,  $J = 6.2$  Hz, 2H), 2.05 (s, 3H), 2.03 (d,  $J = 5.2$  Hz, 1H), 1.97 (d,  $J = 2.4$  Hz, 1H), 1.91 (s, 4H), 1.64 (q,  $J = 6.8$  Hz, 3H), 1.38 – 1.33 (m, 2H), 1.31 – 1.21 (m, 12H), 0.85 (dt,  $J = 13.2, 6.9$  Hz, 3H).  $^{13}\text{C}$  NMR (DMSO, 151 MHz)  $\delta$  (ppm.) 179.80, 172.50, 165.52, 162.78, 153.75, 147.79, 143.79, 142.75, 141.85, 138.17, 135.50, 134.84, 132.49, 132.34, 131.32, 131.13, 130.58, 128.73, 128.58, 128.50, 128.32, 127.20, 126.34, 126.24, 125.85, 116.52, 114.45, 114.26, 97.21, 67.82, 63.43, 62.50, 52.51, 36.15, 31.75, 29.25, 29.16, 28.13, 26.03, 24.40, 24.13, 22.60, 21.62, 14.48. HRMS-ESI:  $m/z$  calcd.  $[\text{M}+2\text{H}]^{2+}$  for  $\text{C}_{78}\text{H}_{97}\text{N}_{13}\text{O}_5\text{S}$ , 1329.7602; found, 1329.7600

**Compound TTC-L-M-6:** 0.073 g, 0.05 mmol; Yield: 87%.  $^1\text{H}$  NMR ( $\text{CD}_3\text{OD}$ , 400 MHz)  $\delta$ (ppm.) 8.33 (s, 1H), 8.08 (s, 1H), 7.87 (s, 2H), 7.77 (d,  $J = 9.3$  Hz, 1H), 7.58 (s, 1H), 7.52 (d,  $J = 11.1$  Hz, 2H), 7.48 (d,  $J = 7.6$  Hz, 1H), 7.19 – 6.96 (m, 13H), 6.92 (d,  $J = 8.1$  Hz, 1H), 6.86 (d,  $J = 8.1$  Hz, 1H), 6.67 (d,  $J = 7.4$  Hz, 1H), 6.61 (d,  $J = 9.1$  Hz, 1H), 5.67 (s, 4H), 4.58 – 4.33 (m, 4H), 3.86 (m, 4H), 3.36 (m, 12H), 3.28 – 3.15 (m, 6H), 2.94 – 2.72 (m, 4H), 2.37 – 2.25 (m, 4H), 2.20 (m, 4H), 2.16 (m, 2H), 2.14 – 2.09 (m, 6H), 2.07 – 2.03 (m, 12H), 1.69 (q,  $J = 7.1$  Hz, 2H), 1.41 (m, 4H), 1.29 (m, 13H), 0.90 – 0.85 (m, 3H).  $^{13}\text{C}$  NMR (DMSO, 151 MHz)  $\delta$  (ppm.) 179.78, 179.59, 172.49, 165.56, 162.82, 158.04, 157.92, 157.27, 153.67, 153.62, 147.69, 145.77, 143.78, 143.65, 142.70, 141.83, 139.25, 138.19, 135.50, 134.86, 132.54, 132.48, 132.33, 132.10, 131.31, 131.26, 130.56, 128.57, 128.49, 128.32, 127.40, 127.18, 126.30, 126.21, 125.82, 125.37, 116.53, 114.45, 114.25, 97.34, 67.81, 66.49, 65.55, 52.52, 48.00, 33.87, 31.74, 29.24, 29.16, 29.04, 28.65, 28.52, 26.04, 25.89, 25.80, 25.71, 24.97, 24.14, 22.59, 21.64, 14.48. HRMS-ESI:  $m/z$  calcd.  $[\text{M}+2\text{H}]^{2+}$  for  $\text{C}_{83}\text{H}_{107}\text{N}_{13}\text{O}_5\text{S}$ , 1399.8385; found, 1399.8384

## 1.2 *In Vitro* and *in Vivo* Experiments

**Fluorescence Measurements:** TTC-L-M-1/2/3/4/5/6 were dissolved in DMSO to obtain the stock solutions (1 mM). Solutions of different concentrations were obtained by transferring appropriate aliquots of stock solutions to volumetric flasks and then diluting them to certain volumes using deionised Milli-Q water and organic solvent. All of the samples were vortex mixed and allowed to stand for 6 - 10 min before testing.

**Gel Retardation Assay.** The samples were prepared by adding liposomes with different concentrations to 1  $\mu\text{L}$  of pUC18 DNA (200  $\mu\text{g}/\text{mL}$ ) in Tris-HCl buffer (50 mM, pH 7.4) with a total volume of 20  $\mu\text{L}$  at room temperature. After that, the samples were incubated at 37°C for 30 min, and 2  $\mu\text{L}$  of 6 $\times$  loading buffer were added to the above samples. The samples were electrophoresed at 100 V on a 0.7% agarose gel containing GelRed in Tris-acetate (TAE) running buffer for 30 min. The result was visualized under on a UVP EC3 visible imaging system

**Assembly of TTC-L-M-1/2/3/4/5/6:** The morphologies of micelles and complexes were studied by scanning electronic microscopy (SEM) and dynamic light scattering (DLS). The DLS sample were prepared similar to gel retardation assay, the solution was

diluted to 200  $\mu\text{L}$  after interaction with negatively supercoiled pUC18 DNA at 37°C for 30 min. The diluted solution 10  $\mu\text{L}$  dropped on the surface of wafer, then completely evaporated to obtain the SEM.

**$^1\text{O}_2$ -Generation Detection:** ABDA was applied as the  $^1\text{O}_2$  monitoring agent. The 25  $\mu\text{L}$  of ABDA stock solution (1mg/mL) was added to 2 mL of **TTC-L-M-4** suspension (10  $\mu\text{M}$ ), and LED light (450 nm, 10 mW/cm<sup>2</sup>) was employed as the irradiation source. The absorption of ABDA was recorded at 378 nm at various irradiation times to obtain the decay rate of the photosensitizing process.

**Cytotoxicity Assay.** The cytotoxicity of liposomes was investigated in HeLa, A549 and HepG2 cells by MTT assay. All cells were cultured in complete medium in a humidified atmosphere containing 5% CO<sub>2</sub> at 37 °C. After 24 h of incubation, the cells were seeded in 96-well plate (7000 cells/well) and cultured for another 24 h. The cells were incubated with different concentrations of liposomes for 4 h. Then, 100  $\mu\text{L}$  complete medium were added to each well and cultured for 20 h. The medium was replaced with 20  $\mu\text{L}$  of MTT (5 mg/mL) and incubated for another 4 h. Finally, MTT was replaced with 120  $\mu\text{L}$  of DMSO, and the plates were oscillated for 10 min to fully dissolve the formazan crystals formed by living cells in the wells. The optical density (OD) was recorded at 490 nm using a Thermo Scientific Multiskan GO. The viability of the cells was calculated using the following formula:

$$\text{Cell viability} = [\text{OD}_{490} (\text{Sample}) - \text{OD}_{490} (\text{Blank})] / [\text{OD}_{490} (\text{Control}) - \text{OD}_{490} (\text{Blank})] \times 100\%$$

HeLa cells were treated with **TTC-L-M-4/DOPE** for 4 h and then exposed to LED light (450 nm, 10 mW/cm<sup>2</sup>) for the exploration of phototoxicity. The cytotoxicity was performed using the MTT assay as described above 24 h later. Cells without any treatments were used as controls.

**Cell Imaging.** Time dependence of cellular uptakes of **TTC-L-M-4/DOPE/Cy5-DNA** were measured by confocal laser scanning microscopy (CLSM) in HeLa cell lines. The cells were seeded in Glass Bottom Cell Culture Dishes at  $5 \times 10^4$  cells per dish and cultured for 24 h. After washed three times with PBS, the cells were exposure to **TTC-L-M-4/DOPE/Cy5-DNA** for predetermined durations. The Hoechst 33342 (5  $\mu\text{g/mL}$ ) was also added to the cells for nuclear staining at 37 °C for 10 min. Finally, the cells were washed for 5 times with PBS buffer, observed using a confocal laser scanning microscope with a 60 $\times$  oil-immersion objective.

**Cell Migration Study:** The cells were incubated for 4 h with **TTC-L-M-4/DOPE/pGL-3** and **TTC-L-M-4/DOPE/p53** in a 6-well chamber. Then, a 10  $\mu\text{L}$  tip was then used to scratch a wound gap on the monolayer HeLa cells. The scratched cells were washed away with 1  $\times$  PBS buffer, and the wound gaps were imaged by CLSM with a 10 $\times$  objection and cultured for 20 h. For the PDT-treated group (**TTC-L-M-4/DOPE/pGL-3 (+L)**) and the combination treatment group (**TTC-L-M-4/DOPE/p53 (+L)**), the cells were subjected to light irradiation for 10 min irradiation at 24 h post-internalization. For the gene therapy group (**TTC-L-M-4/DOPE/p53 (-L)**), cells were cultured for another 20 h. Finally, the wound gaps were imaged.

**In Vitro Apoptosis Assay:** HeLa cells were cultured as described above, incubated with **TTC-L-M-4/DOPE/pGL-3** and **TTC-L-M-4/DOPE/p53** for 4 h. After changing the

medium to fresh ones, cells were cultured for 20 h. For the PDT-treated group (TTC-L-M-4/DOPE/pGL-3 (+L)) and the combination treatment group (TTC-L-M-4/DOPE/p53 (+L)), the cells were subjected to light irradiation for 10 min irradiation at 24 h post-internalization. For the gene therapy group (TTC-L-M-4/DOPE/p53 (-L)), cells were cultured for another 24 h. The cell viability was determined at 48 h post transfection using the MTT assay. Furthermore, the Annexin V-FITC Apoptosis Detection Kit were used for detecting the apoptosis of HeLa cells treated with different formulations via flow cytometry following the manufacturer's instructions.

***In Vivo* Antitumor Assay:** BALB/c nude mice (five weeks, female) were subcutaneously injected with  $1 \times 10^6$  HeLa cells in the right flank to establish a HeLa tumor model. When the tumors reached 50-100 mm<sup>3</sup>, the mice were randomly divided into four groups (n = 5 per group) and subcutaneously injected around the tumor every other day with 100  $\mu$ L of lipoplexes (7  $\mu$ g DNA and 140  $\mu$ M liposomes). Group 1 treated injection of PBS. Group 2 treated TTC-L-M-4/DOPE/pGL-3 and light irradiation (LED light, 450 nm, 10 mW/cm<sup>2</sup>) for 30 min at 24 h post injection. Group 3 treated TTC-L-M-4/DOPE/p53 but without light irradiation. Group 4 treated TTC-L-M-4/DOPE/p53 and light irradiation (LED light, 450 nm, 10 mW/cm<sup>2</sup>) for 30 min at 24 h post injection. Tumor sizes of each group were monitored every other day by a caliper (tumor volume = length  $\times$  width  $\times$  width/2). Relative tumor volumes were calculated as  $V/V_0$  ( $V_0$  was the tumor volume when the treatment was initiated). On the 14th day, all the mice were sacrificed and the tumor tissues were sectioned and collected for hematoxylin-eosin (H&E) staining.

## 2. Characterizations of TTC-L-M Derivatives

### 2.1. UV-Visible Spectra of the Compounds in Different Solvents

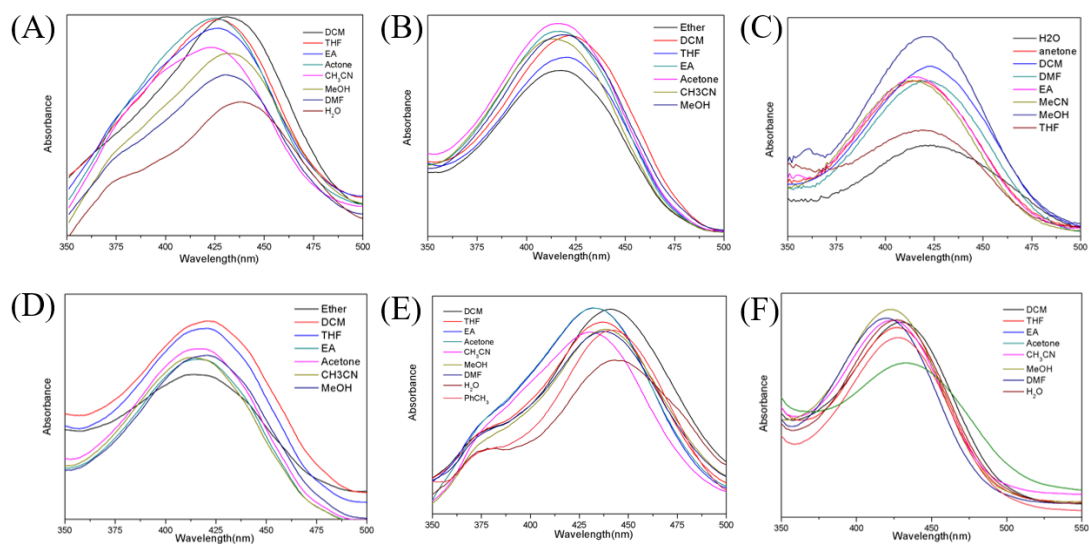

**Figure S1.** UV-vis spectra of TTC-L-M-1/2/3/4/5/6 in different solutions. Concentration:  $10 \mu\text{M}$

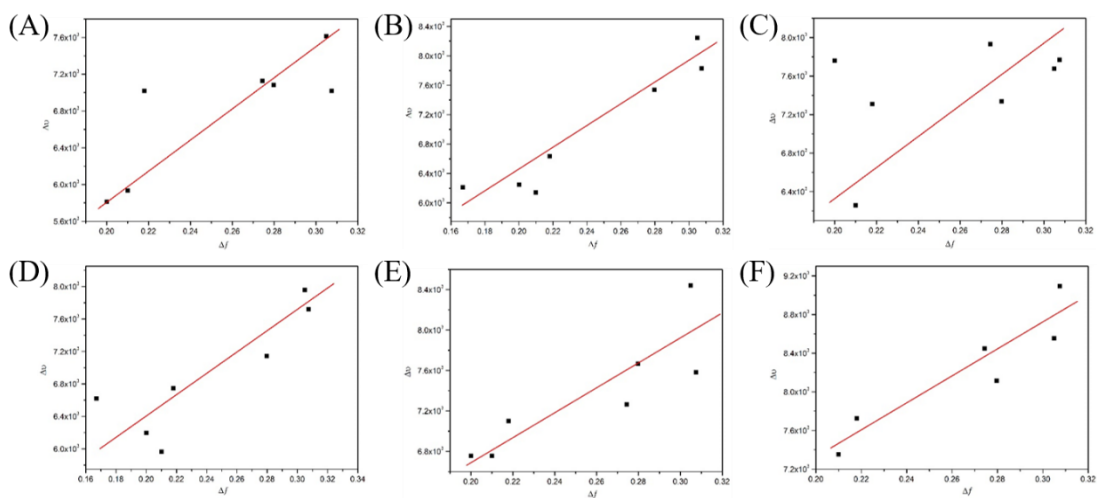

**Figure S2.** Plot of Stokes shift ( $\Delta\nu$ ) of TTC-L-M-1/2/3/4/5/6 versus  $\Delta f$  of their solutions. Concentration:  $10 \mu\text{M}$ ;  $\lambda_{\text{ex}} = 426 \text{ nm}$

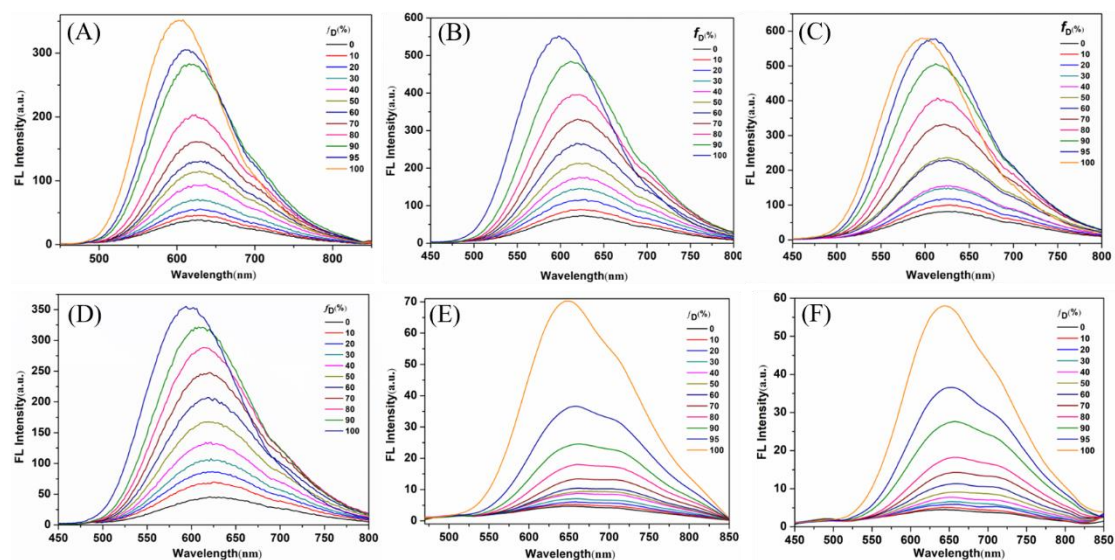

**Figure S3.** (A-F) Fluorescence spectra of TTC-L-M-1/2/3/4/5/6 in MeOH/DCM mixtures with different DCM fractions ( $f_w$ ). Concentration:  $10 \mu\text{M}$ ;  $\lambda_{\text{exc}} = 426 \text{ nm}$ .

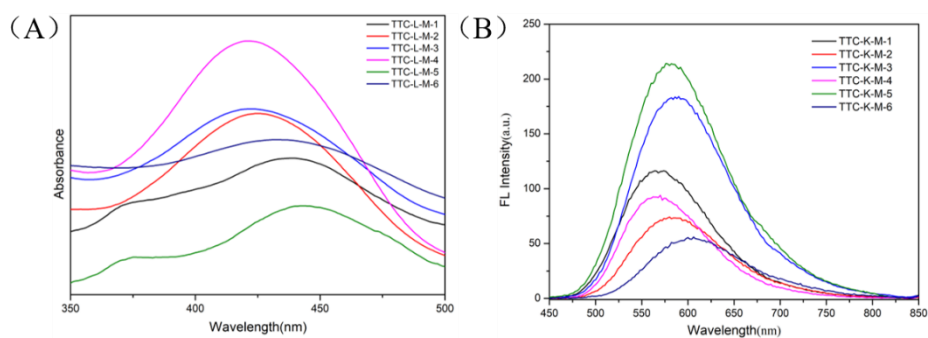

**Figure S4.** (A) UV-vis spectra of TTC-L-M derivatives in  $\text{H}_2\text{O}$ . (B) Fluorescence spectra of TTC-L-M derivatives in  $\text{H}_2\text{O}$ . Concentration:  $10 \mu\text{M}$ ;  $\lambda_{\text{exc}} = 426 \text{ nm}$ .

**Table S1** Summarized photophysical data of **TTC-L-M** derivatives in Different Solvents

| <b>Compound</b>  | <b>solvent</b> | $\lambda_{ab}(nm)$ | $\lambda_{em}(nm)$ | <b>Stoke's shift (nm)</b> | $\Phi_F/\%$ |
|------------------|----------------|--------------------|--------------------|---------------------------|-------------|
| <b>TTC-L-M-1</b> | DCM            | 431                | 618                | 187                       | 19.3        |
|                  | THF            | 427                | 572                | 145                       | 5.3         |
|                  | EA             | 427                | 568                | 141                       | 6.1         |
|                  | Acetone        | 426                | 610                | 184                       | 7.6         |
|                  | MeCN           | 423                | 624                | 201                       | 8.4         |
|                  | MeOH           | 432                | 620                | 188                       | 3.6         |
|                  | DMF            | 430                | 620                | 190                       | 9.3         |
| <b>TTC-L-M-2</b> | Ether          | 422                | 572                | 150                       | 1.8         |
|                  | DCM            | 424                | 590                | 166                       | 14.1        |
|                  | THF            | 420                | 566                | 146                       | 8.2         |
|                  | EA             | 417                | 564                | 147                       | 5.3         |
|                  | Acetone        | 416                | 606                | 190                       | 8.8         |
|                  | MeCN           | 412                | 624                | 212                       | 8.1         |
|                  | MeOH           | 421                | 628                | 207                       | 2.6         |
| <b>TTC-L-M-3</b> | DCM            | 420                | 606                | 186                       | 16.8        |
|                  | THF            | 418                | 566                | 148                       | 5           |
|                  | EA             | 414                | 610                | 196                       | 3.7         |
|                  | Acetone        | 420                | 607                | 187                       | 6.5         |
|                  | MeCN           | 421                | 622                | 201                       | 6.6         |
|                  | MeOH           | 423                | 630                | 207                       | 3.7         |
|                  | DMF            | 417                | 623                | 206                       | 9.6         |

| Compound         | solvent | $\lambda_{ab}(nm)$ | $\lambda_{em}(nm)$ | Stoke's shift (nm) | $\Phi_F/\%$ |
|------------------|---------|--------------------|--------------------|--------------------|-------------|
| <b>TTC-L-M-4</b> | Ether   | 417                | 576                | 159                | 8.0         |
|                  | DCM     | 423                | 592                | 169                | 9.5         |
|                  | THF     | 422                | 564                | 142                | 4.3         |
|                  | EA      | 419                | 566                | 147                | 4.9         |
|                  | Acetone | 419                | 598                | 179                | 7.5         |
|                  | MeCN    | 417                | 624                | 207                | 6.7         |
|                  | MeOH    | 422                | 626                | 204                | 3.0         |
| <b>TTC-L-M-5</b> | DCM     | 441                | 642                | 201                | 5.6         |
|                  | THF     | 437                | 620                | 183                | 4.8         |
|                  | EA      | 432                | 610                | 178                | 7.1         |
|                  | Acetone | 432                | 646                | 214                | 3.3         |
|                  | MeCN    | 430                | 675                | 245                | 1.5         |
|                  | MeOH    | 439                | 658                | 219                | 1.4         |
|                  | DMF     | 447                | 662                | 215                | 1.8         |
| <b>TTC-L-M-6</b> | DCM     | 430                | 644                | 214                | 5.0         |
|                  | THF     | 423                | 614                | 191                | 4.9         |
|                  | Acetone | 423                | 644                | 221                | 2.3         |
|                  | MeCN    | 421                | 658                | 237                | 1.1         |
|                  | MeOH    | 427                | 698                | 271                | 0.7         |
|                  | DMF     | 427                | 668                | 241                | 1.5         |

Abbreviation:  $\lambda_{ab}$  = absorption maximum,  $\lambda_{em}$  = emission maximum,  $\Phi_F$  = fluorescence quantum yield, concentration: 10  $\mu M$



**Table S2** Summarized photophysical data of **TTC-L-M** derivatives in H<sub>2</sub>O

|                  | $\lambda_{ab}(nm)$ | $\lambda_{em}(nm)$ | Stoke's shift (nm) | $\Phi_F/\%$ |
|------------------|--------------------|--------------------|--------------------|-------------|
| <b>TTC-L-M-1</b> | 439                | 564                | 125                | 7.7         |
| <b>TTC-L-M-2</b> | 427                | 580                | 153                | 8.3         |
| <b>TTC-L-M-3</b> | 422                | 590                | 168                | 9.0         |
| <b>TTC-L-M-4</b> | 421                | 570                | 149                | 10.5        |
| <b>TTC-L-M-5</b> | 444                | 576                | 132                | 9.4         |
| <b>TTC-L-M-6</b> | 433                | 600                | 167                | 12.0        |

## 2.2 Micelle Formation

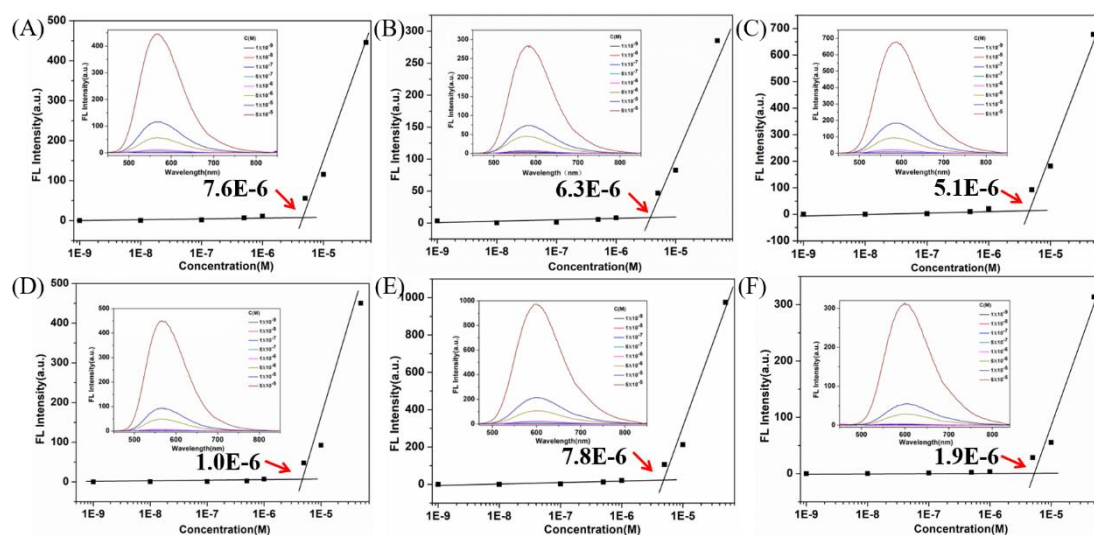

**Figure S5.** (A-F) Determination of critical micelle concentrations (CMCs) of **TTC-L-M-1/2/3/4/5/6** in water.  $\lambda_{ex} = 426$  nm, 25 °C

### 2.3 SEM, DLS and Zeta Measurements

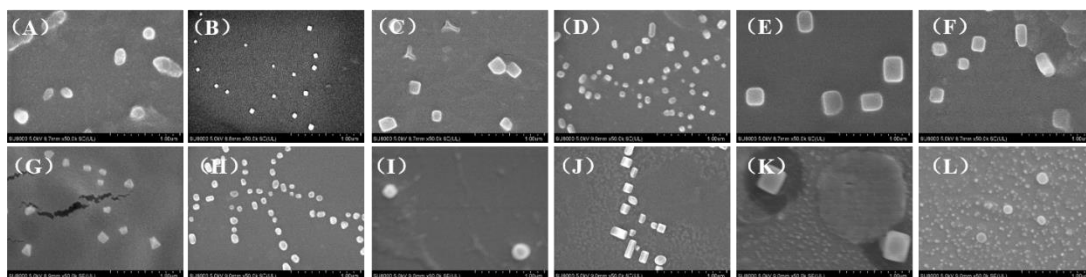

**Figure S6.** SEM images of TTC-L-M derivatives in the absence (A-F) and presence of DOPE (G-L). [TTC-L-M-1] = 35  $\mu\text{M}$ , [TTC-L-M-2] = 10  $\mu\text{M}$ , [TTC-L-M-3] = 15  $\mu\text{M}$ , [TTC-L-M-4] = 25  $\mu\text{M}$ , [TTC-L-M-5] = 30  $\mu\text{M}$ , [TTC-L-M-6] = 20  $\mu\text{M}$ ; scale bars: 1  $\mu\text{m}$ .

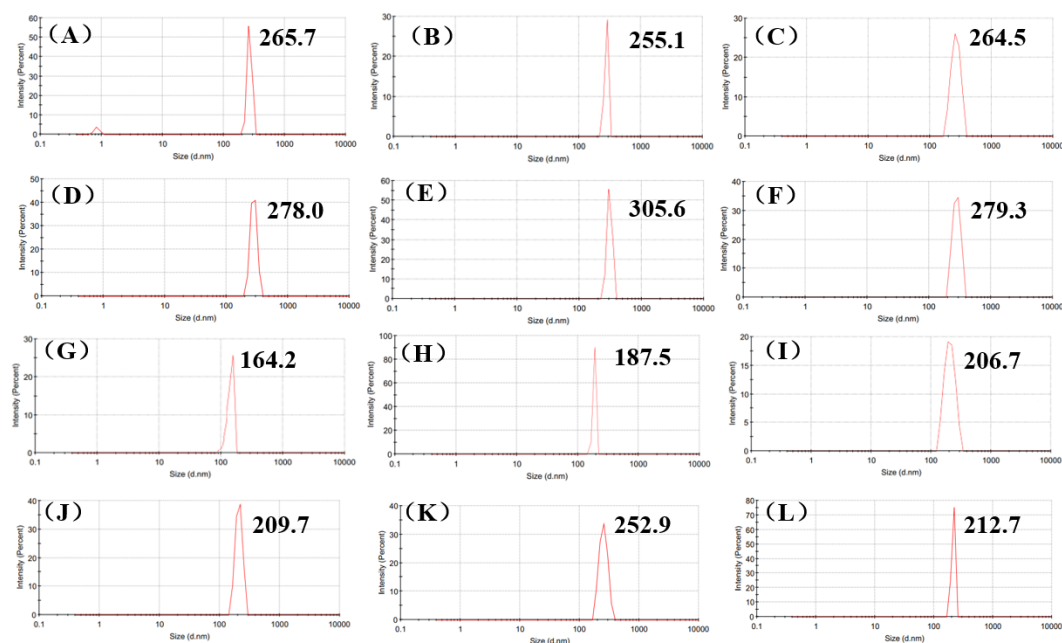

**Figure S7.** DLS of TTC-L-M derivatives in the absence (A-F) and presence of DOPE (G-L). [TTC-L-M-1] = 35  $\mu\text{M}$ , [TTC-L-M-2] = 10  $\mu\text{M}$ , [TTC-L-M-3] = 15  $\mu\text{M}$ , [TTC-L-M-4] = 25  $\mu\text{M}$ , [TTC-L-M-5] = 30  $\mu\text{M}$ , [TTC-L-M-6] = 20  $\mu\text{M}$

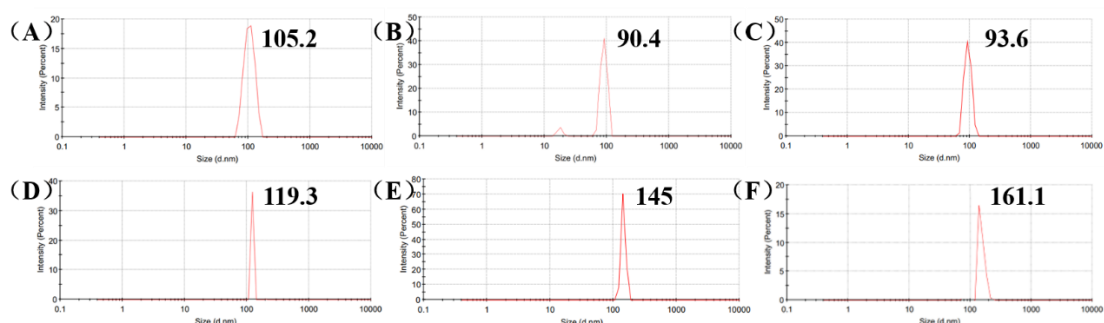

**Figure S8.** DLS of the lipoplexes of **TTC-L-M** derivatives/DOPE (1:2) with pUC18 DNA in Tris buffer (50 mM, pH 7.4). [TTC-L-M-1] = 35  $\mu$ M, [TTC-L-M-2] = 10  $\mu$ M, [TTC-L-M-3] = 15  $\mu$ M, [TTC-L-M-4] = 25  $\mu$ M, [TTC-L-M-5] = 30  $\mu$ M, [TTC-L-M-6] = 30  $\mu$ M.

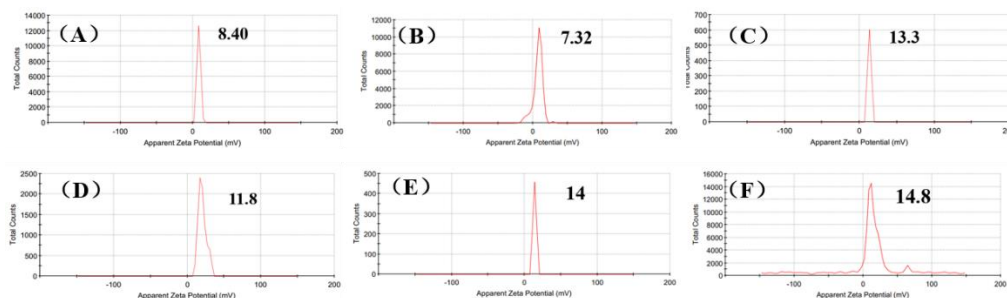

**Figure S9.** Zeta potentials of pUC18 DNA complexes. [TTC-L-M-1] = 35  $\mu$ M, [TTC-L-M-2] = 10  $\mu$ M, [TTC-L-M-3] = 15  $\mu$ M, [TTC-L-M-4] = 25  $\mu$ M, [TTC-L-M-5] = 30  $\mu$ M, [TTC-L-M-6] = 20  $\mu$ M, [DNA] = 10  $\mu$ g/mL

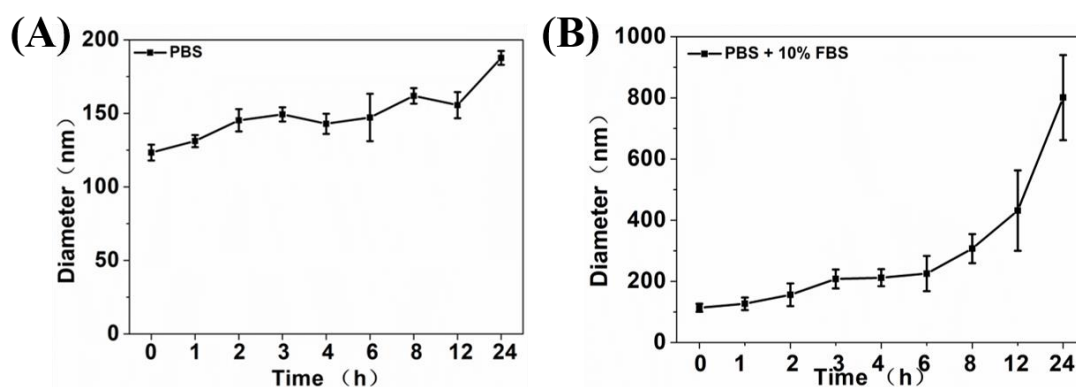

**Figure S10.** The average diameters of **TTC-L-M-4**/DOPE/DNA in PBS (A) and 10% FBS (B) after incubation for different time. [TTC-L-M-4] = 15  $\mu$ M, [pDNA] = 10  $\mu$ g/mL, r.t.

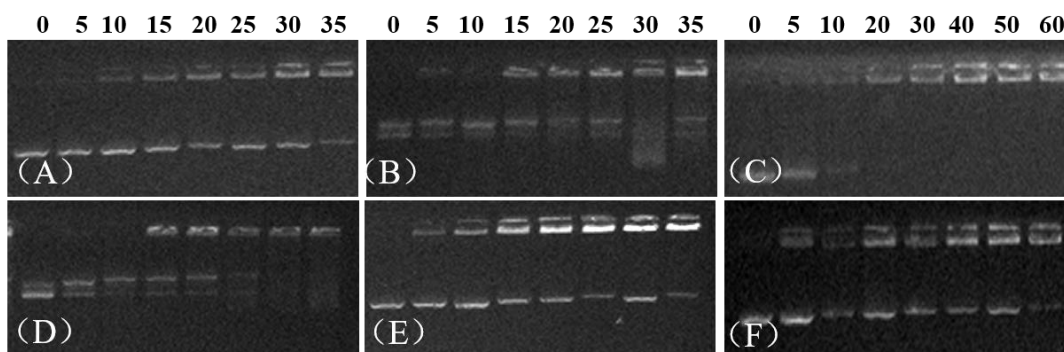

**Figure S11.** Gel electropherogram assay of the DNA induced by different concentrations of **TTC-L-M-1/2/3/4/5/6** in the absence of DOPE (A-F) in Tris-HCl (50 mM, pH 7.4). [DNA] = 10  $\mu\text{g/mL}$ , r.t.

## 2.4 EB Assay

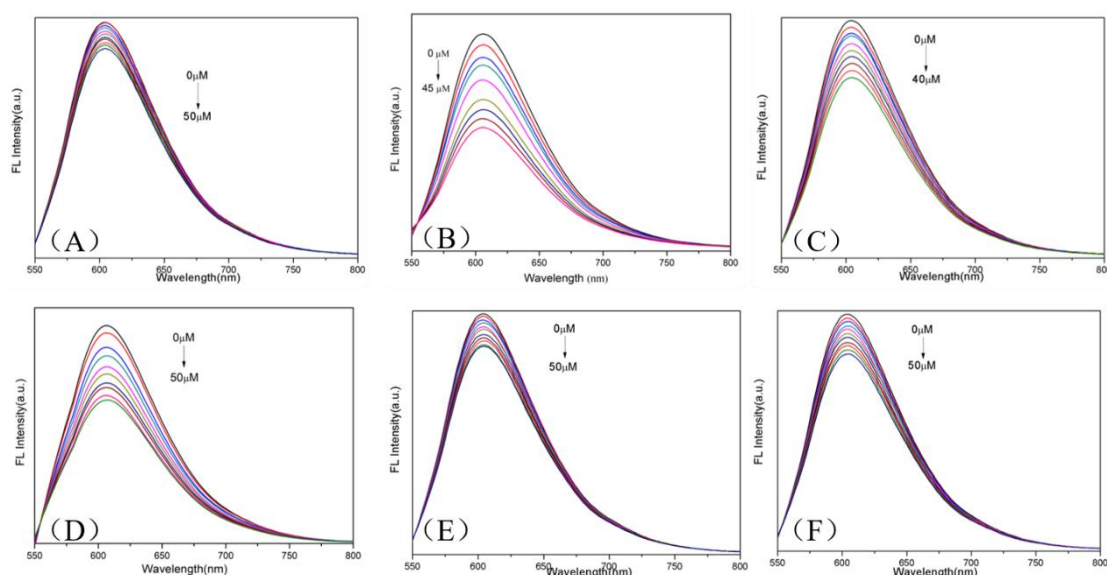

**Figure S12.** Ethidium bromide exclusion measurements by **TTC-L-M-1/2/3/4/5/6** in the presence of DOPE (1:2 ratio) in 5mM Tris-HCl/50mM NaCl (pH 7.4, 25 °C). [EB] = 20  $\mu\text{M}$ , [DNA] = 100  $\mu\text{M}$ .

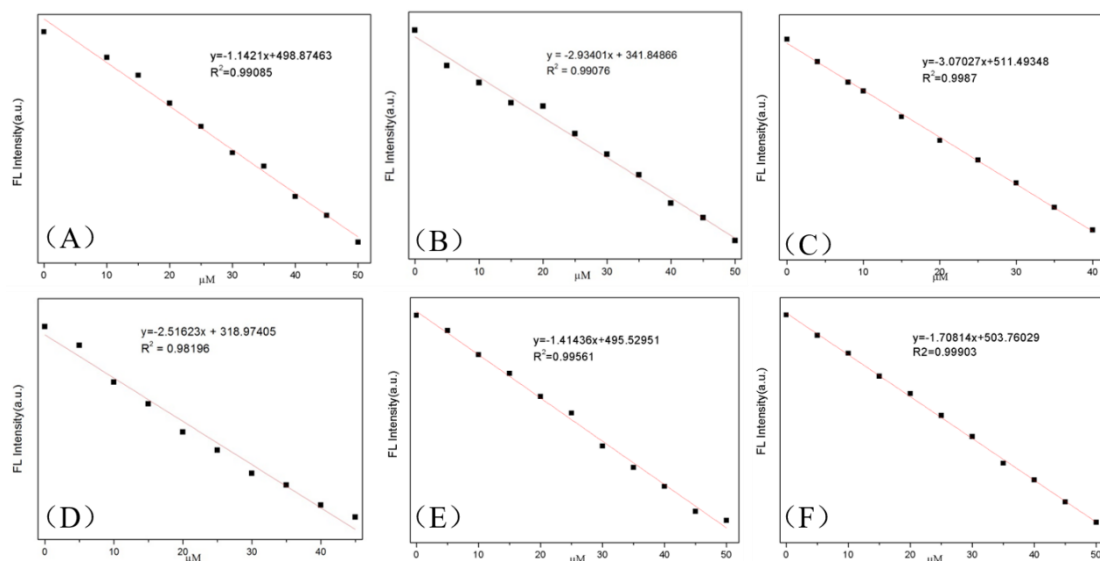

**Figure S13.** (A-F) Ethidium bromide exclusion measurements by **TTC-L-M-1/2/3/4/5/6** in the presence of DOPE (1:2 ratio) in 5mM Tris-HCl/50mM NaCl (pH 7.4, 25 °C). [EB] = 20  $\mu$ M, [DNA] = 100  $\mu$ M.

## 2.5 Docking Assays and Gel Electrophoresis

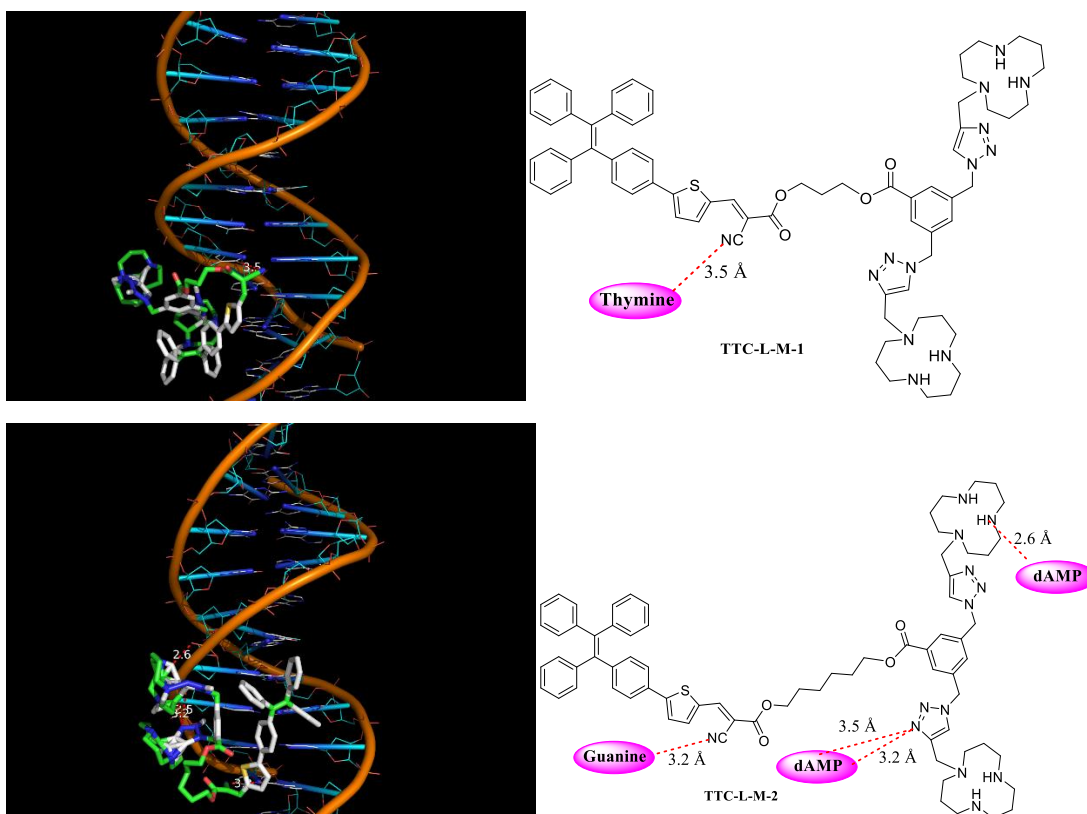

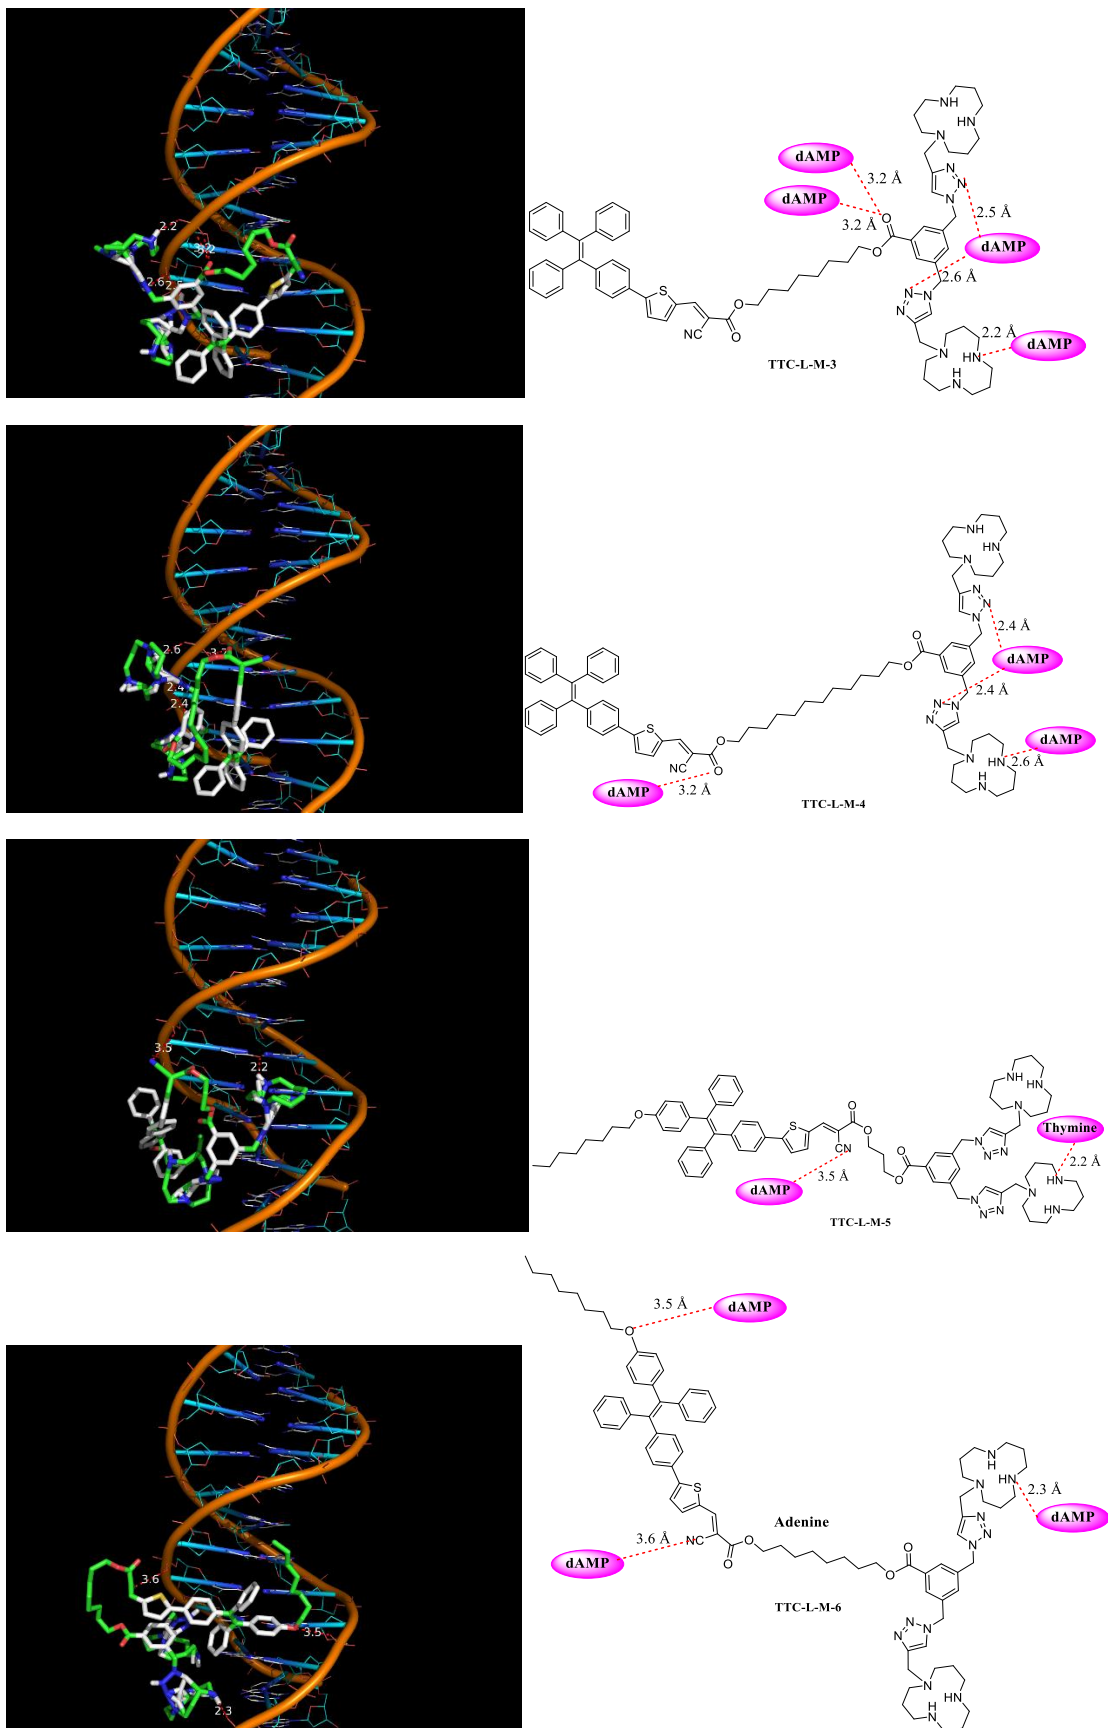

Figure S14. Molecular docking results of compounds and DNA. (PDB code 1BNA)

## 2.6 DNA Release

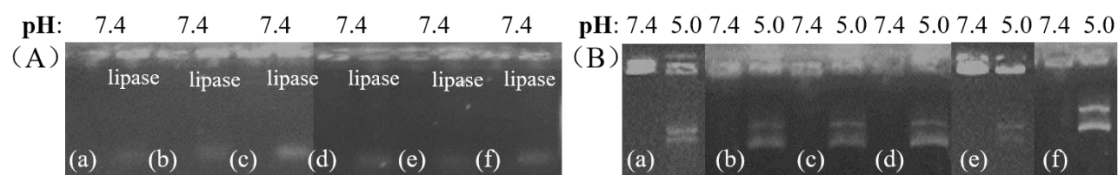

**Figure S15.** (A) Gel electrophoresis to measure the reversibility of DNA condensations caused by TTC-L-M derivatives/DOPE (1:2) in the presence of lipase. (B) Gel electrophoresis experiments at different pH values. [DNA] = 9  $\mu\text{g/mL}$ , [lipase] = 10  $\mu\text{g/mL}$ , [heparin] = 40  $\mu\text{g/mL}$ .

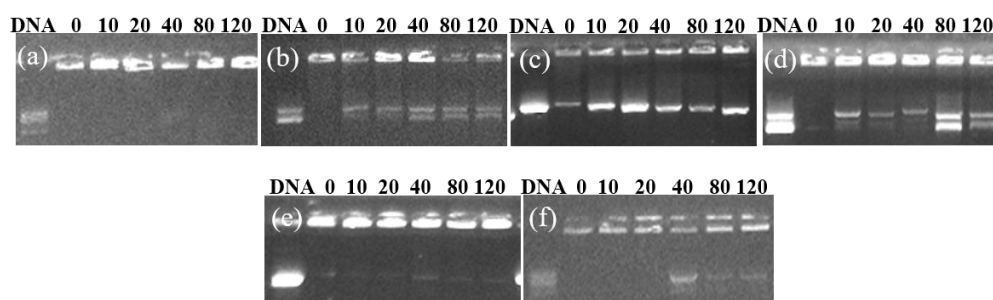

**Figure S16.** Gel electrophoresis to measure the reversibility of DNA condensations caused by TTC-L-M-1/DOPE (35  $\mu\text{M}$ ), TTC-L-M-2/DOPE (15  $\mu\text{M}$ ), TTC-L-M-3/DOPE (10  $\mu\text{M}$ ), TTC-L-M-4/DOPE (15  $\mu\text{M}$ ), TTC-L-M-5/DOPE (30  $\mu\text{M}$ ) and TTC-L-M-6/DOPE (20  $\mu\text{M}$ ) at heparin. [DNA] = 10  $\mu\text{g/mL}$ , heparin = 0 – 120  $\mu\text{g/mL}$ .

## 2.7 Cell Cytotoxicity

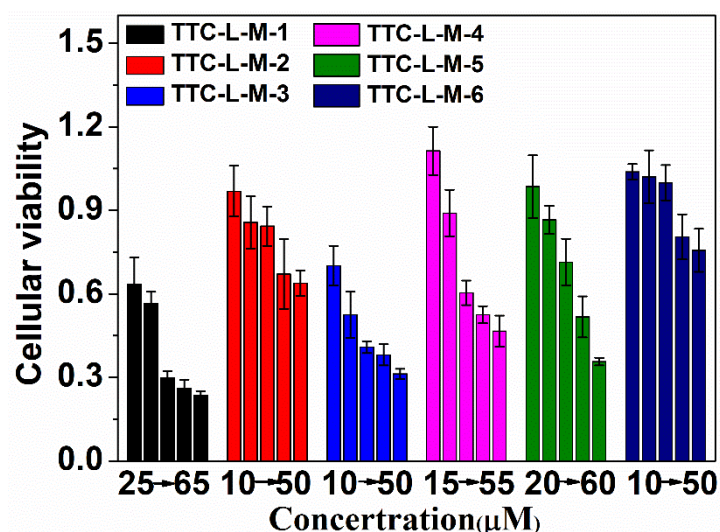

**Figure S17.** Cytotoxicity of HeLa cell lines cultured with TTC-L-M derivatives at different concentrations

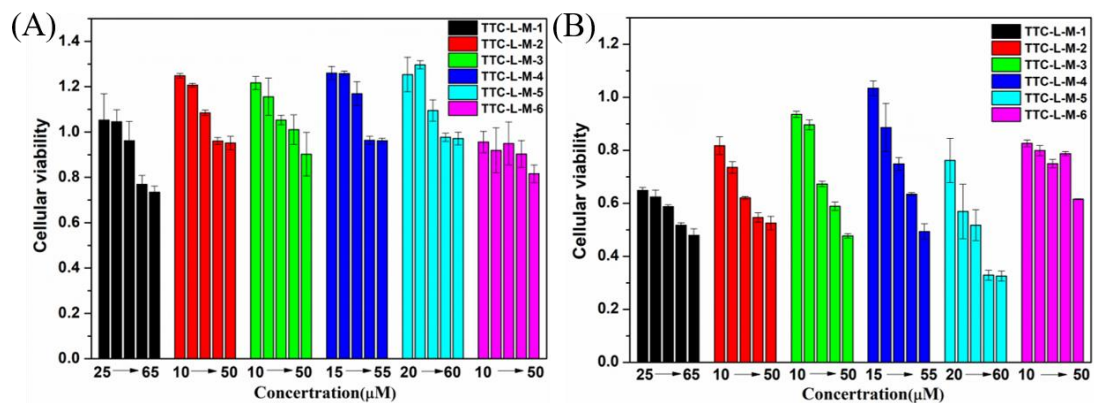

**Figure S18.** Cytotoxicity of TTC-L-M derivatives/DOPE (1:2) at different concentrations cultured with HepG2 cell lines (A) and A549 cell lines (B).

**Table S3** The calculated  $\text{IC}_{50}$  values of TTC-L-M derivatives.

|                  | <b>A549</b> | <b>HeLa</b> | <b>HepG2</b> |
|------------------|-------------|-------------|--------------|
| <b>TTC-L-M-1</b> | 53.02       | 77.85       | 77.19        |
| <b>TTC-L-M-2</b> | 54.74       | 73.51       | 122.69       |
| <b>TTC-L-M-3</b> | 55.59       | 117.96      | 126.87       |
| <b>TTC-L-M-4</b> | 62.95       | 131.91      | >1000        |
| <b>TTC-L-M-5</b> | 37.57       | 101.93      | 143.09       |
| <b>TTC-L-M-6</b> | 201.67      | 84.32       | 343.18       |

## 2.8 Gene Transfection Assays

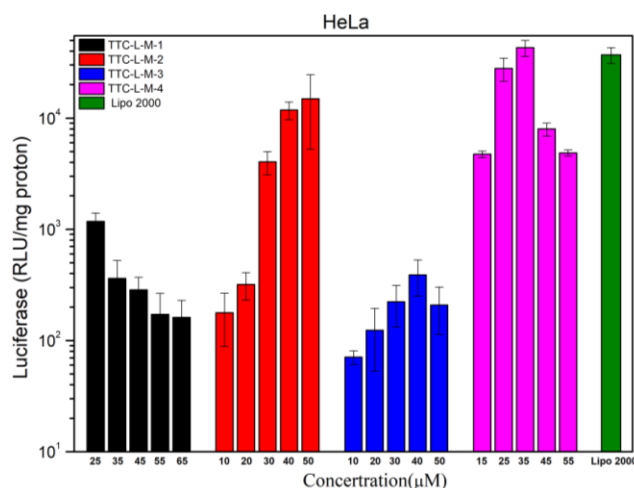

**Figure S19.** Luciferase gene expressions transfected by TTC-L-M-1/2/3/4 in HeLa cell lines with Lipo2000 as control. [pGL-3] = 10  $\mu\text{g/mL}$



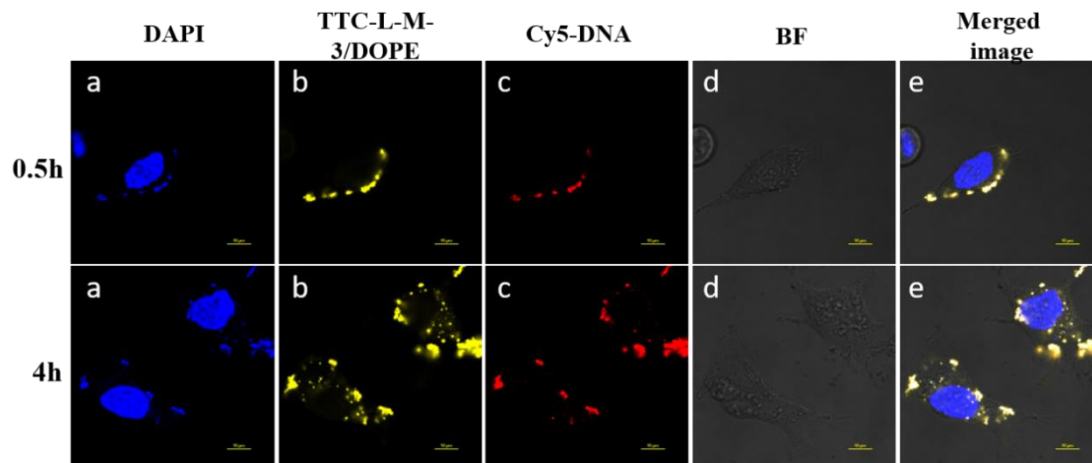

**Figure S20.** CLSM images of transport process into HeLa cells after treated with **TTC-L-M-3/DOPE** (1:2) and **Cy5-labeled DNA** for 0.5 and 4h. The nuclei were stained with Hoechst 33342. (a) The nucleus (Blue channel). (b) **TTC-L-M-3/DOPE** (yellow channel). (c) **Cy5-labeled DNA** (red channel). (d) Bright field. (e) Merge of a, b, c, d. [**TTC-L-M-3**] = 25  $\mu\text{M}$ , [**Cy5-DNA**] = 10  $\mu\text{g/mL}$ , scale bar: 10  $\mu\text{m}$ .

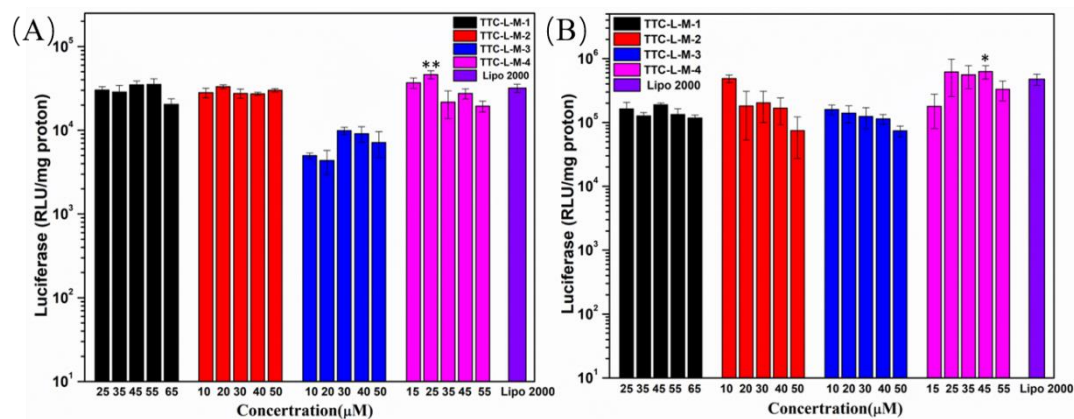

**Figure S21.** Luciferase expression induced by different concentrations of **TTC-L-M-1/2/3/4-DOPE** (1:2) in HepG2 cell lines (A) and A549 cell lines (B) with Lipo2000 as control. Data represent mean  $\pm$  SD (n = 3); \*0.01 < p < 0.05, \*\*0.001 < p < 0.01, and \*\*\* p < 0.001 analyzed by Student's t-test.

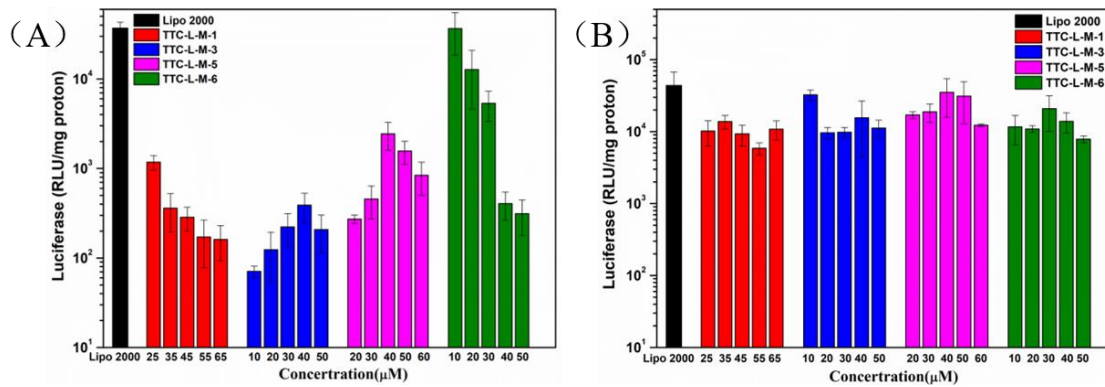

**Figure S22.** Luciferase expression induced by different concentrations of TTC-L-M-1/3/5/6 without or with DOPE in HeLa cell lines with Lipo2000 as control.

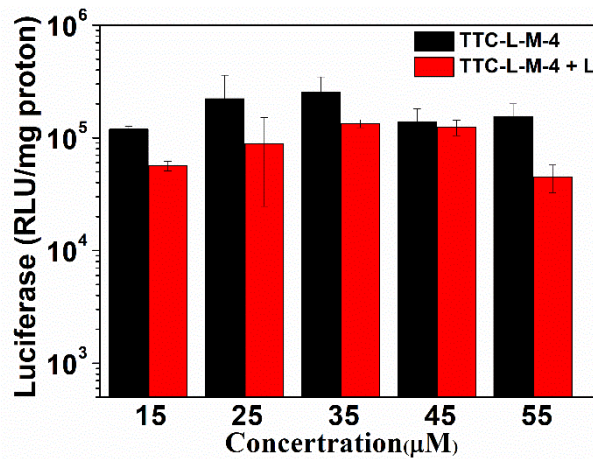

**Figure S23.** Luciferase expression induced by different concentrations of TTC-L-M-4-DOPE (1:2) in HeLa cell lines under dark or LED light irradiation.

**Table S4** Optimal luciferase expressions of TTC-L-M-1/2/3/4 in HeLa cell lines (% of Lipo2000).

|      | TTC-L-M-1 | TTC-L-M-2 | TTC-L-M-3 | TTC-L-M-4 |
|------|-----------|-----------|-----------|-----------|
| HeLa | 3.2       | 40.3      | 1.1       | 116.5     |

**Table S5** Optimal luciferase expressions of TTC-L-M-1/3/5/6 in HeLa cell lines (% of Lipo2000).

|      | TTC-L-M-1 | TTC-L-M-3 | TTC-L-M-5 | TTC-L-M-6 |
|------|-----------|-----------|-----------|-----------|
| HeLa | 3.2       | 1.1       | 6.6       | 99.3      |

**Table S6** Optimal luciferase expressions of **TTC-L-M** derivatives/DOPE in different cell lines (% of Lipo2000). The molar ratio of **TTC-L-M** derivatives and DOPE was 1:2

|                  | <b>A549</b> | <b>HepG2</b> | <b>HeLa</b> |
|------------------|-------------|--------------|-------------|
| <b>TTC-L-M-1</b> | 40          | 111          | 32          |
| <b>TTC-L-M-2</b> | 102         | 104          | 48          |
| <b>TTC-L-M-3</b> | 36          | 31           | 74          |
| <b>TTC-L-M-4</b> | 131         | 145          | 450         |
| <b>TTC-L-M-5</b> | --          | --           | 80          |
| <b>TTC-L-M-6</b> | --          | --           | 47          |

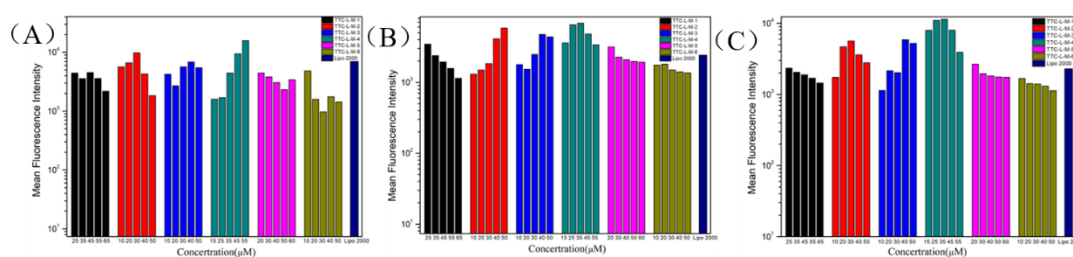

**Figure S24.** Green Fluorescent protein induced by different concentrations of **TTC-L-M** derivatives/DOPE (1:2) in A549 cell lines, HepG2 cell lines and HeLa cell lines with Lipo2000 as control.

**Table S7** Optimal green fluorescent protein expressions of **TTC-L-M** derivatives/DOPE in different cell lines (% of Lipo2000). The molar ratio of **TTC-L-M** derivatives and DOPE was 1:2

|                  | <b>A549</b> | <b>HepG2</b> | <b>HeLa</b> |
|------------------|-------------|--------------|-------------|
| <b>TTC-L-M-1</b> | 63          | 140          | 102         |
| <b>TTC-L-M-2</b> | 140         | 240          | 246         |
| <b>TTC-L-M-3</b> | 98          | 180          | 256         |
| <b>TTC-L-M-4</b> | 226         | 280          | 498         |
| <b>TTC-L-M-5</b> | 63          | 130          | 115         |
| <b>TTC-L-M-6</b> | 69          | 75           | 73          |

**Table S8** Optimal luciferase expressions of **TTC-L-M-4/DOPE** in the media containing 10% serum in different cell lines (% of Lipo2000). The molar ratio of **TTC-L-M-4** and **DOPE** was 1:2

|                  | <b>HeLa</b> | <b>HepG2</b> | <b>A549</b> |
|------------------|-------------|--------------|-------------|
| <b>TTC-L-M-4</b> | 442         | 88           | 143         |

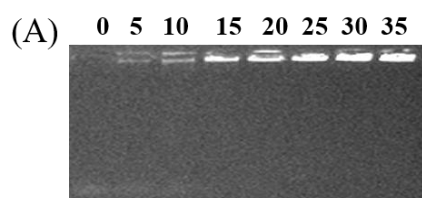

**Figure S25.** (A) Gel electropherogram assay of the siRNA induced by different concentrations of **TTC-L-M-4/DOPE** in Tris-HCl (50 mM, pH 7.4).

**Table S9** Optimal gene silencing of **TTC-L-M-4/DOPE** in different cell lines (% of control). The molar ratio of **TTC-L-M-4** and **DOPE** was 1:2

|                  | <b>HepG2 -Luc</b> | <b>A549-Luc</b> |
|------------------|-------------------|-----------------|
| <b>TTC-L-M-4</b> | 60                | 79              |
| Lipo2000         | 42                | 48              |

## 2.9 Tracing the Delivery of DNA

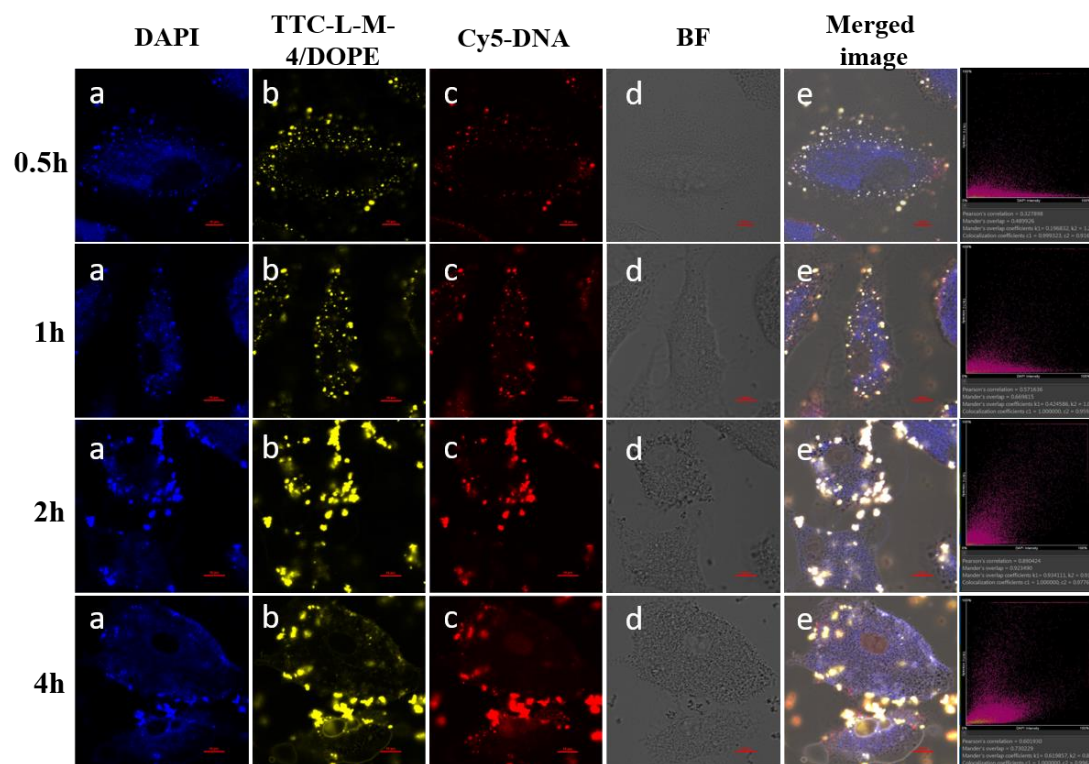

**Figure S26.** Endo/lysosomal escape of TTC-L-M-4/DOPE/Cy5-DNA in HeLa cells for 0.5, 1, 2, and 4 h. The blue channel was LysoTracker-Blue (a). The yellow channel was TTC-L-M-4/DOPE (b). The red channel was Cy5-labeled DNA (c). Bright field (d). Merge of a, b, c, d (e). [TTC-L-M-4] = 25  $\mu$ M, [Cy5-DNA] = 10  $\mu$ g/mL, scale bar: 10  $\mu$ m.

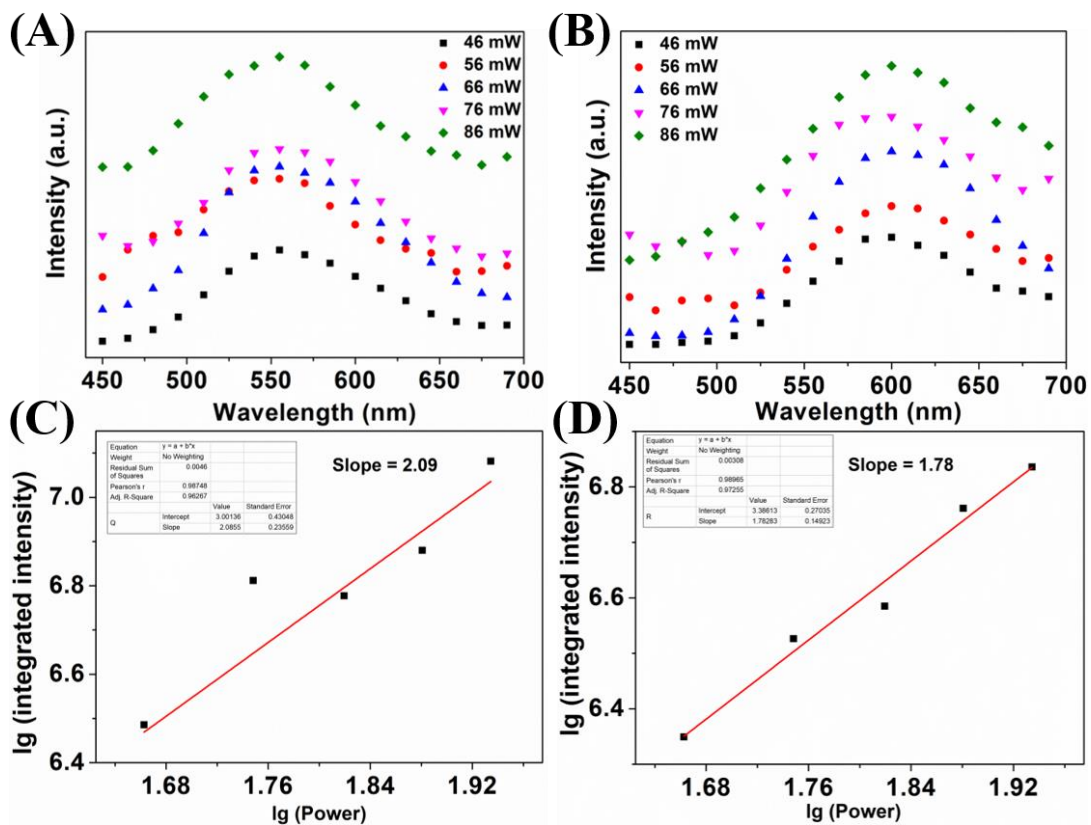

**Figure S27** TPEF spectra of **TTC-L-M-4** (A) and **TTC-L-M-5** (B) at different excitation energies at 840 nm. Linear relationship of logarithm laser power and logarithm-integrated intensity for **TTC-L-M-4** (A) and **TTC-L-M-5** (B) in water. Concentration: 10  $\mu\text{M}$ . Rhodamine B was used as the standard.  $1 \text{ GM} = 1 \times 10^{-50} \text{ cm}^4 \cdot \text{s} \cdot \text{molecule}^{-1} \cdot \text{photon}^{-1}$ .

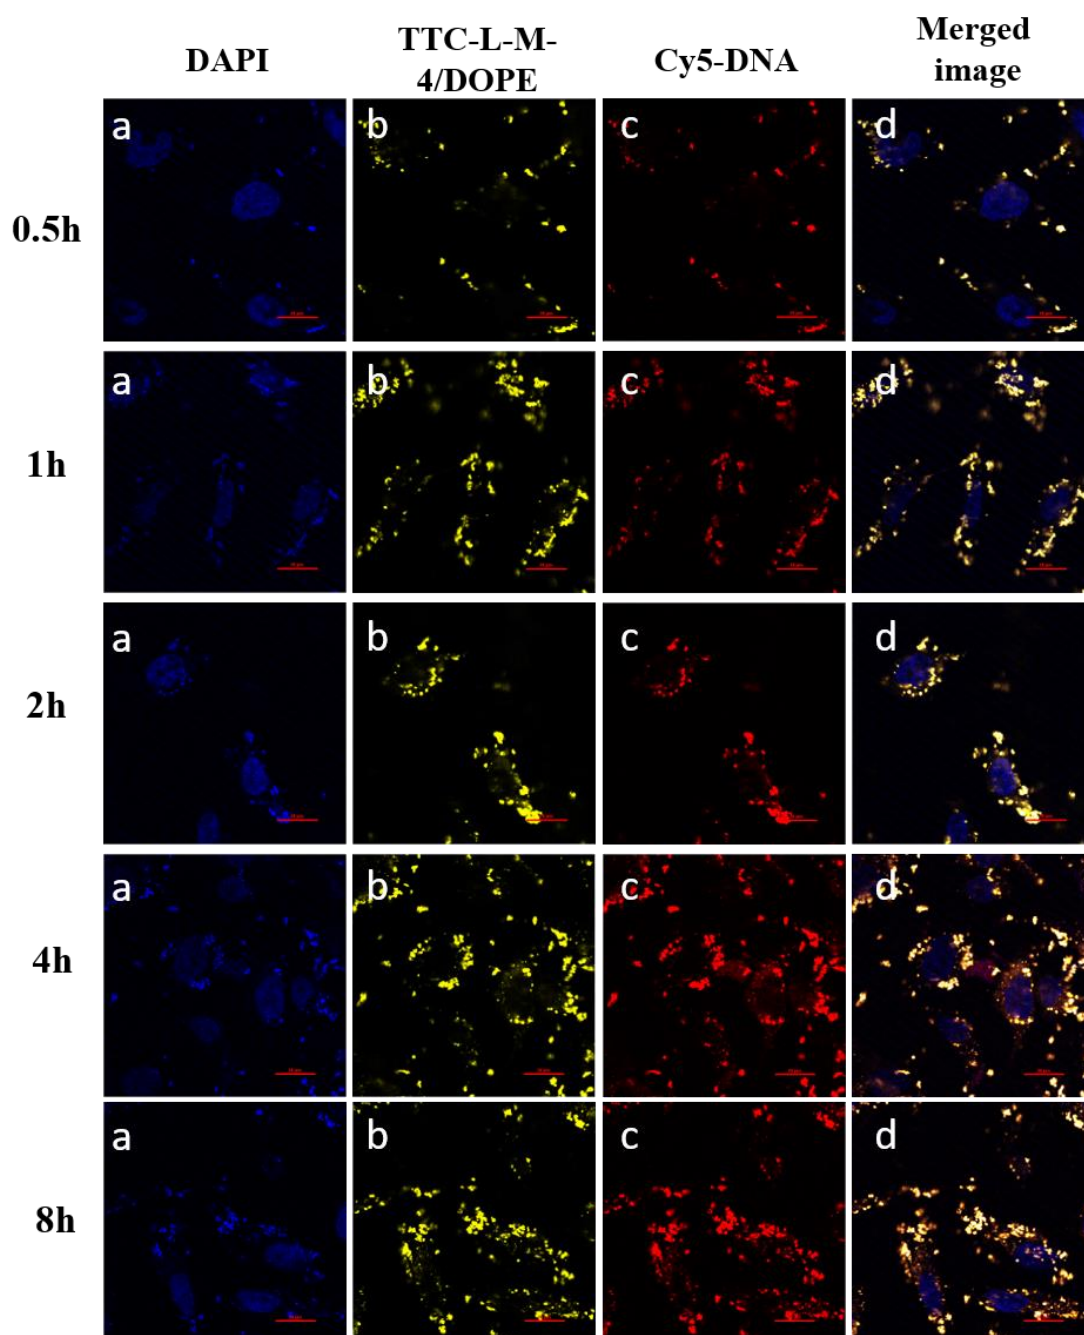

**Figure S28.** Two-photon CLSM images of transport process into HeLa cells after treated with TTC-L-M-4/DOPE (1:2) and Cy5-labeled DNA for 0.5, 1, 2, 4, and 8 h. The nuclei were stained with Hoechst 33342. (a) The nucleus (Blue channel). (b) TTC-L-M-4/DOPE (yellow channel). (c) Cy5-labeled DNA (red channel). (d) Merge of a, b, c. [TTC-L-M-4] = 25  $\mu$ M, [Cy5-DNA] = 10  $\mu$ g/mL, scale bar: 10  $\mu$ m.

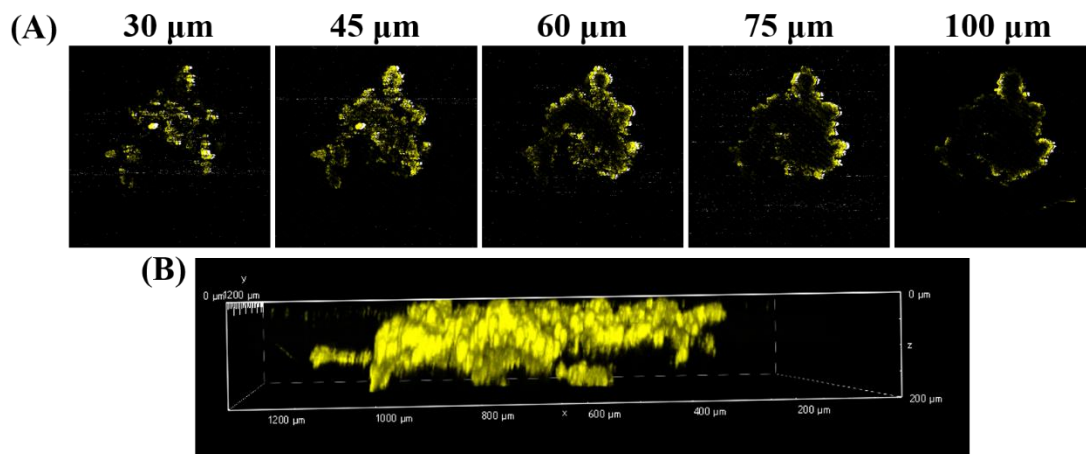

**Figure S29.** (A) The two-photon CLSM Z-stack scanning of the 3D HeLa-cell-based multicellular spheroids after 2 h of treatment with **TTC-L-M-4**. (B) 3D model showing the corresponding positions of CLSM Z stacking scanning in the tumor. [**TTC-L-M-4**] = 10  $\mu$ M,  $\lambda_{\text{ex}}$  = 840 nm.

## 2.10 ROS and PDT

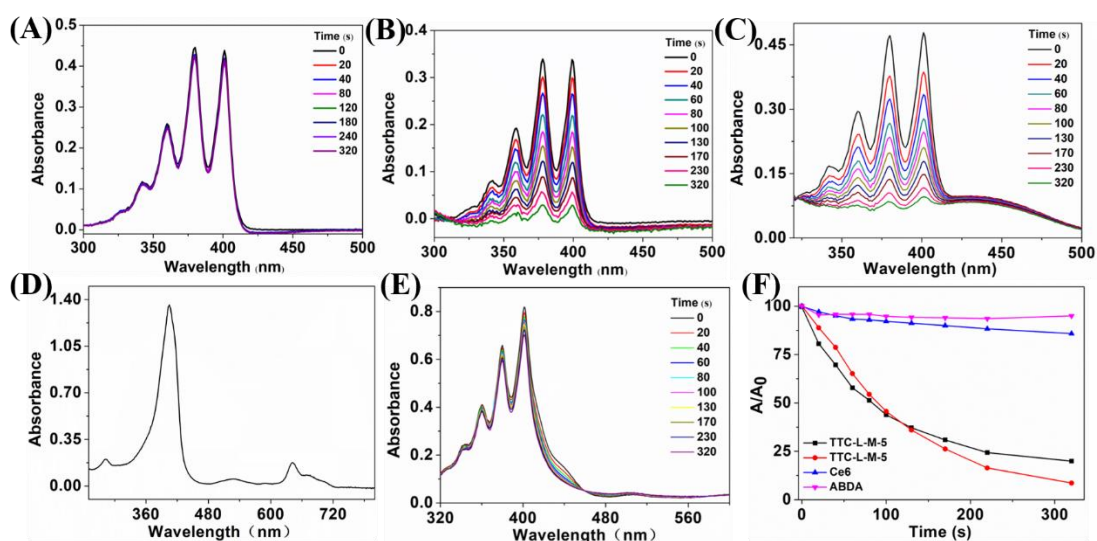

**Figure S30.** Absorption spectra of ABDA (50  $\mu$ M) in the absence (A) or presence (B) of **TTC-L-M-4** (B) /5 (C) and Ce6 (E) under LED light irradiation with different irradiation time. (D) Absorption spectra of Ce6 (10  $\mu$ M). (F) Decomposition rates of ABDA by **TTC-L-M-4/6** and Ce6 under LED light irradiation at pH 7.4, where  $A_0$  and  $A$  are ABDA absorbance at 399 nm.



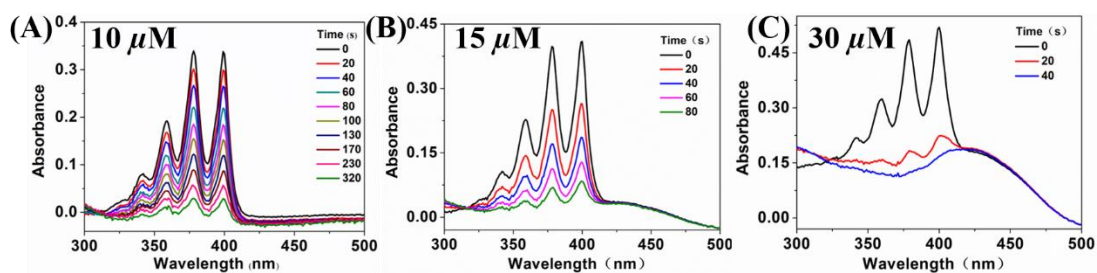

**Figure S31.** Absorption spectra of ABDA ( $50 \mu\text{M}$ ) in presence of TTC-L-M-4 with different concentration under LED light irradiation with different irradiation time.

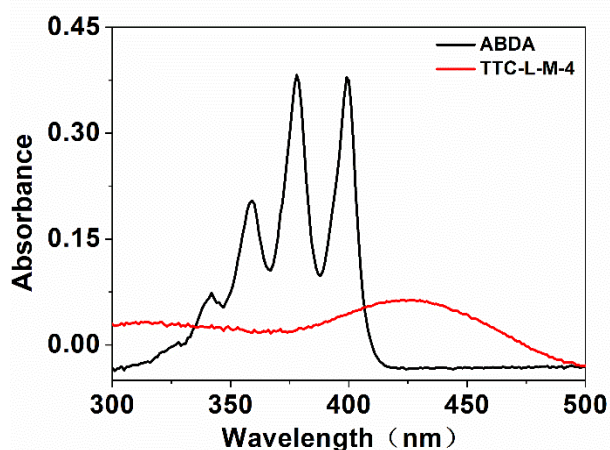

**Figure S32.** Absorption spectra of ABDA ( $50 \mu\text{M}$ ) and TTC-L-M-4 ( $15 \mu\text{M}$ ).

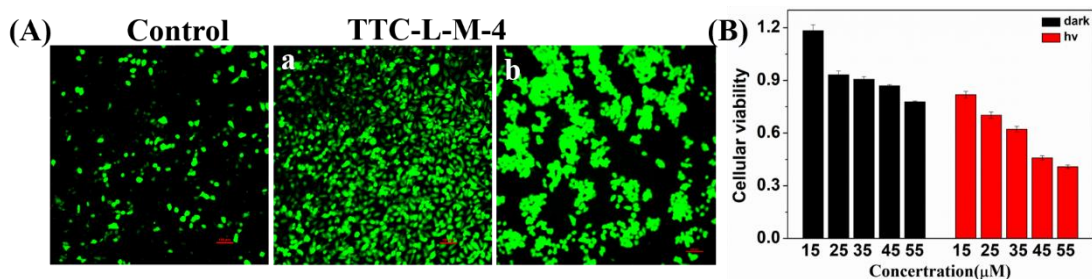

**Figure S33.** (A) Intracellular ROS detection inside HeLa cells by DCFH-DA after treatment in the absence and presence of TTC-L-M-4/DOPE and LED light irradiation (a:  $\lambda_{\text{ex}} = 450 \text{ nm}$ , b:  $\lambda_{\text{ex}} = 880 \text{ nm}$ ). (B) Viabilities of HeLa cells after treatment with TTC-L-M-4/DOPE for 4 h with and without LED light treatment for 10 min.

**Table S10** The calculated IC<sub>50</sub> values of TTC-L-M-4/DOPE with and without LED light treatment for 10 min.

|           | Dark   | LED light irradiation |
|-----------|--------|-----------------------|
| TTC-L-M-4 | 131.91 | 43.5                  |

## 2.11 Western Blot

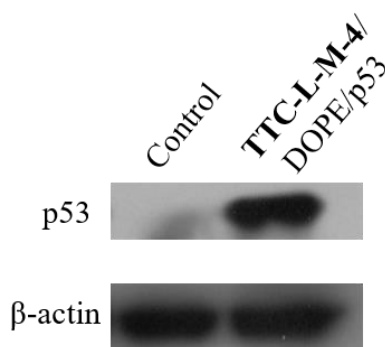

**Figure S34.** Western blot analysis of p53 in HeLa cells treated with TTC-L-M-4/DOPE/p53.

## 2.12 *In vivo* imaging

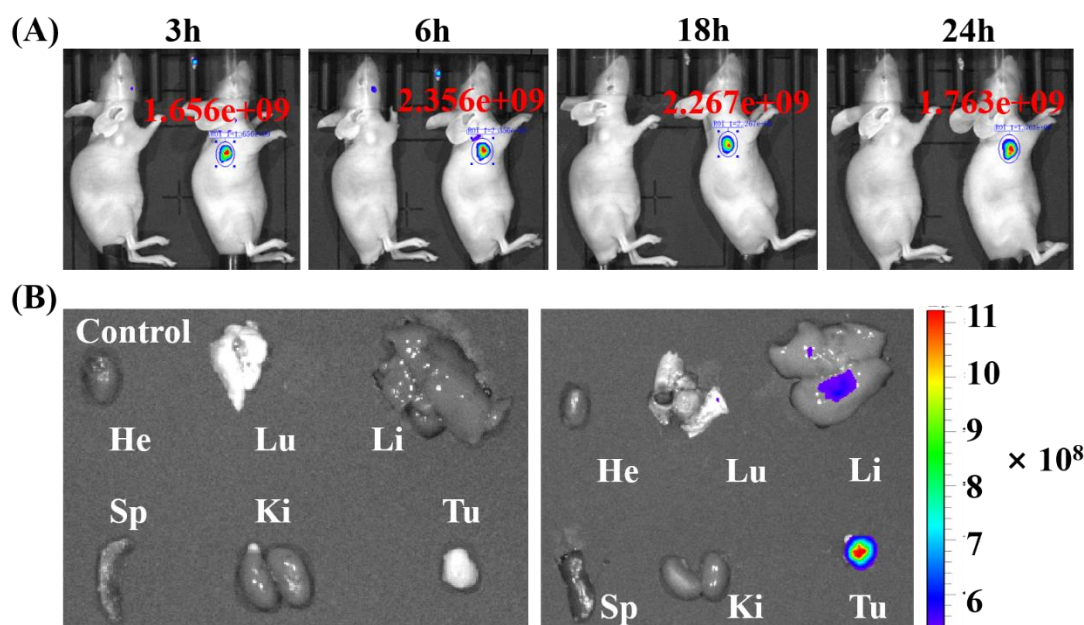

**Figure S35.** (A) *In vivo* imaging of HeLa tumor-bearing mice after subcutaneously injection of TTC-L-M-4/DOPE/pGL3 at different time points. (B) *ex vivo* biodistribution of organs and tumor at 24 h post-injection.

### 2.13 *In vivo* Antitumor Efficacy

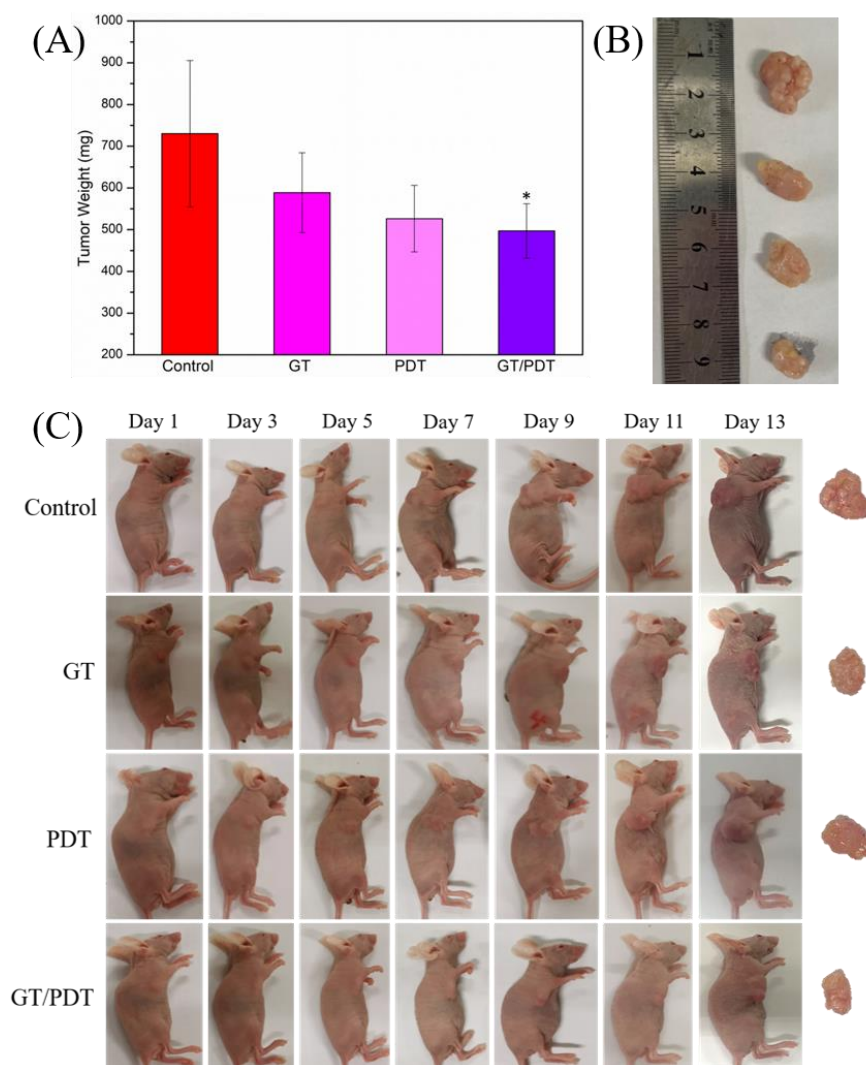

**Figure S36.** (A) Tumor weight change of mice (n = 5). (B) Images of tumor tissues from different groups of tumor-bearing mice on 14th day. (C) Representative photos of mice from different groups from 1th day to 14th day.

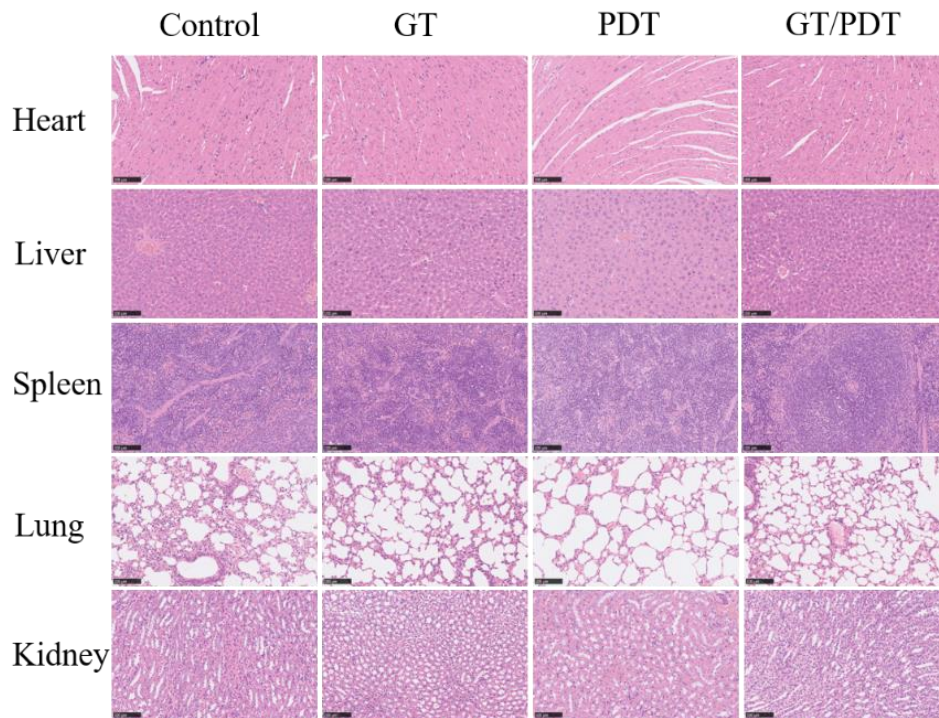

**Figure S37.** H&E-stained tissues excised from mice. Scale bar: 100  $\mu$ m.

### 3. $^1\text{H}$ , $^{13}\text{C}$ -NMR Spectra and HR-MS of Synthesized Compounds

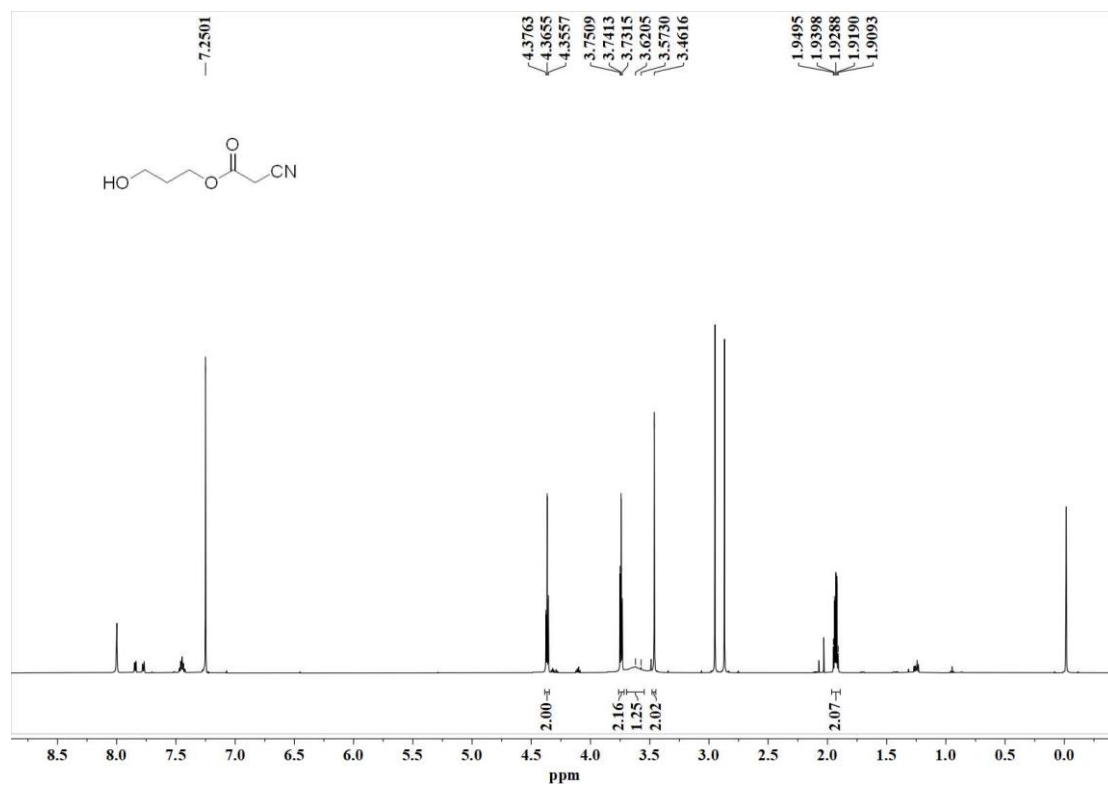

Figure S38  $^1\text{H}$  NMR spectrum of 2 (600 MHz,  $\text{CDCl}_3$ )

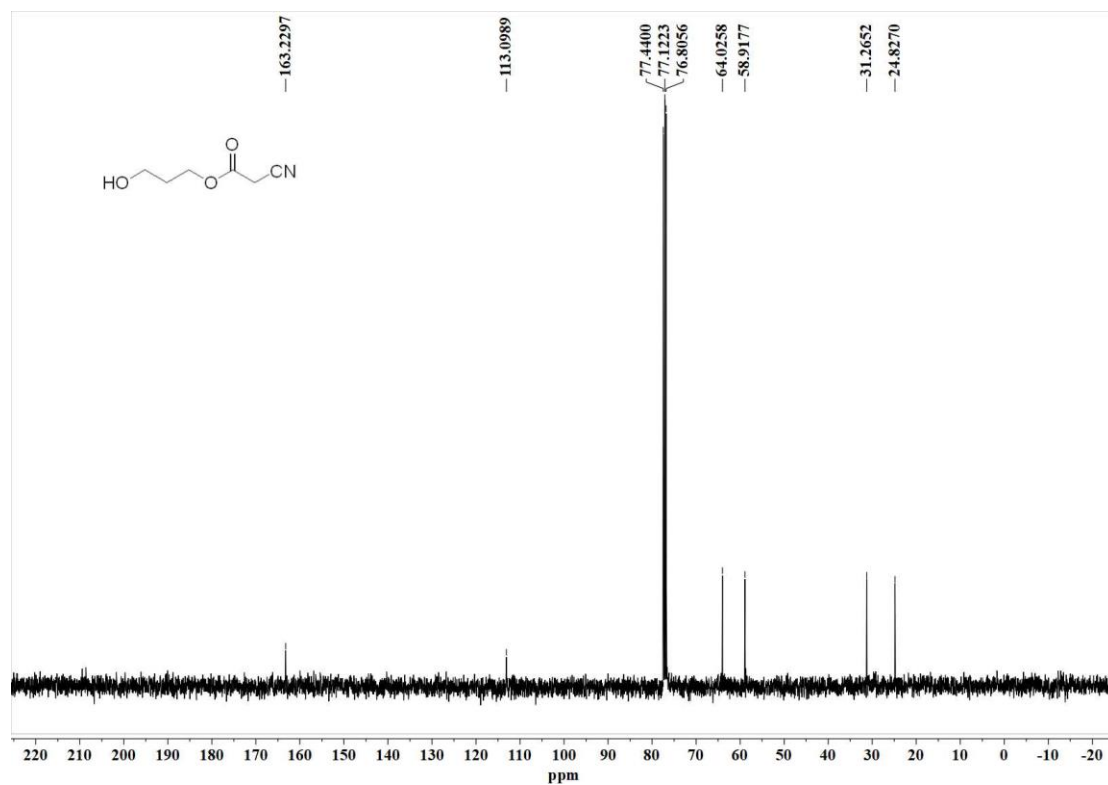

Figure S39  $^{13}\text{C}$  NMR spectrum of 2 (101 MHz,  $\text{CDCl}_3$ ).

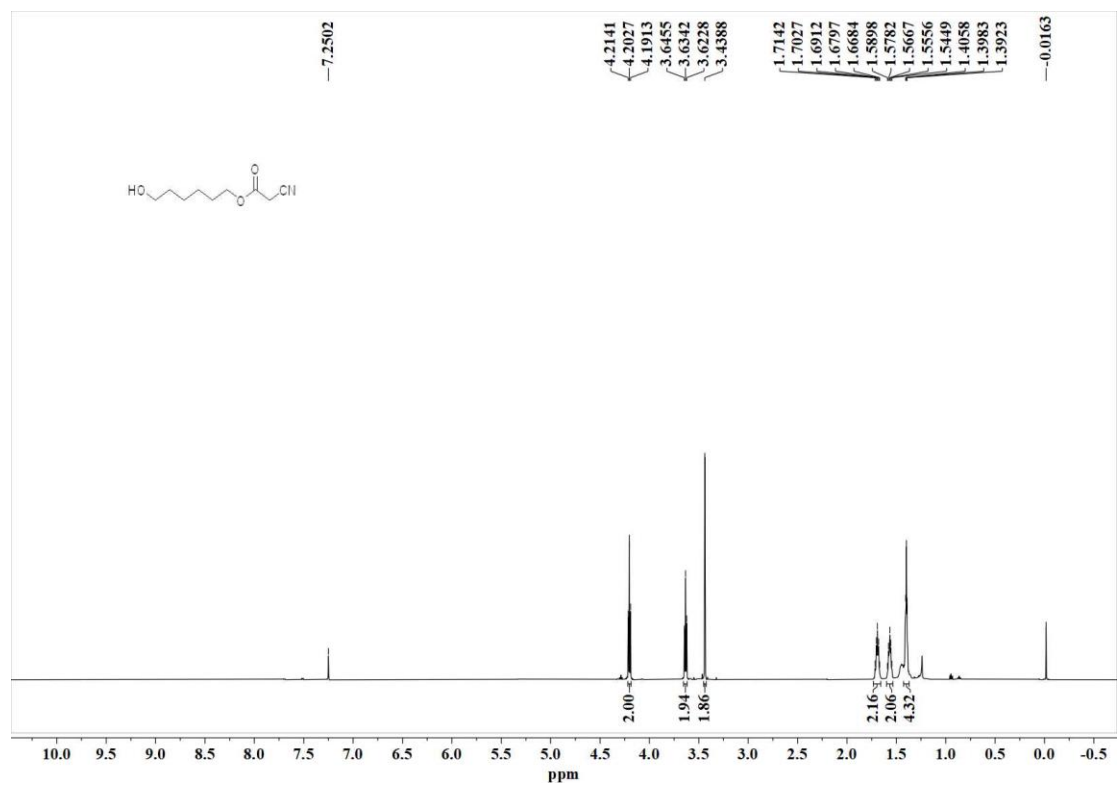

Figure S40 <sup>1</sup>H NMR spectrum of 3 (600 MHz, CDCl<sub>3</sub>)

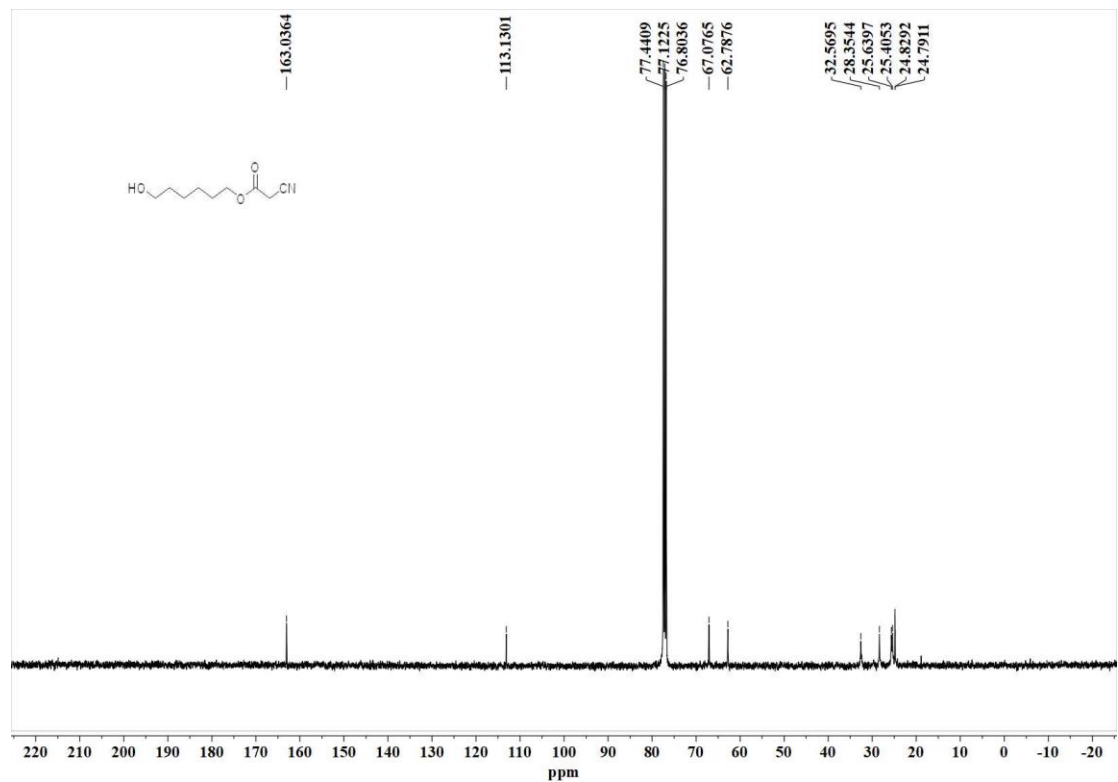

Figure S41 <sup>13</sup>C NMR spectrum of 3 (101 MHz, CDCl<sub>3</sub>).

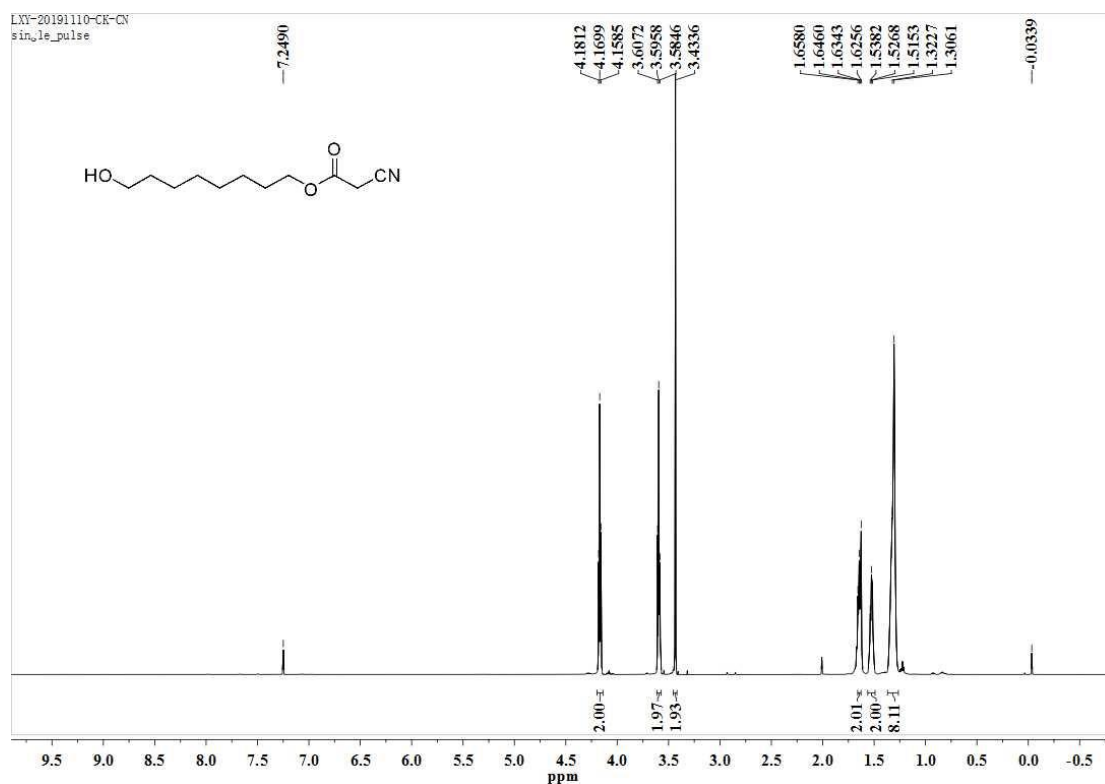

Figure S42 <sup>1</sup>H NMR spectrum of **4** (600 MHz, CDCl<sub>3</sub>)

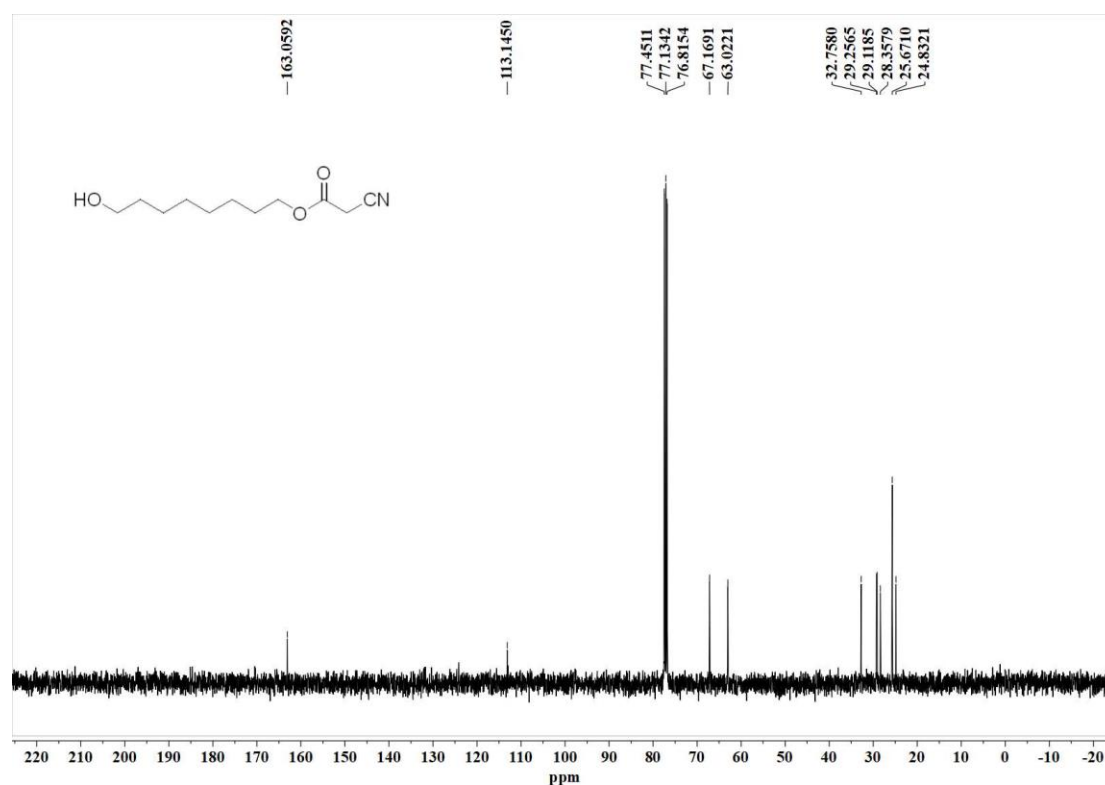

Figure S43 <sup>13</sup>C NMR spectrum of **4** (101 MHz, CDCl<sub>3</sub>).

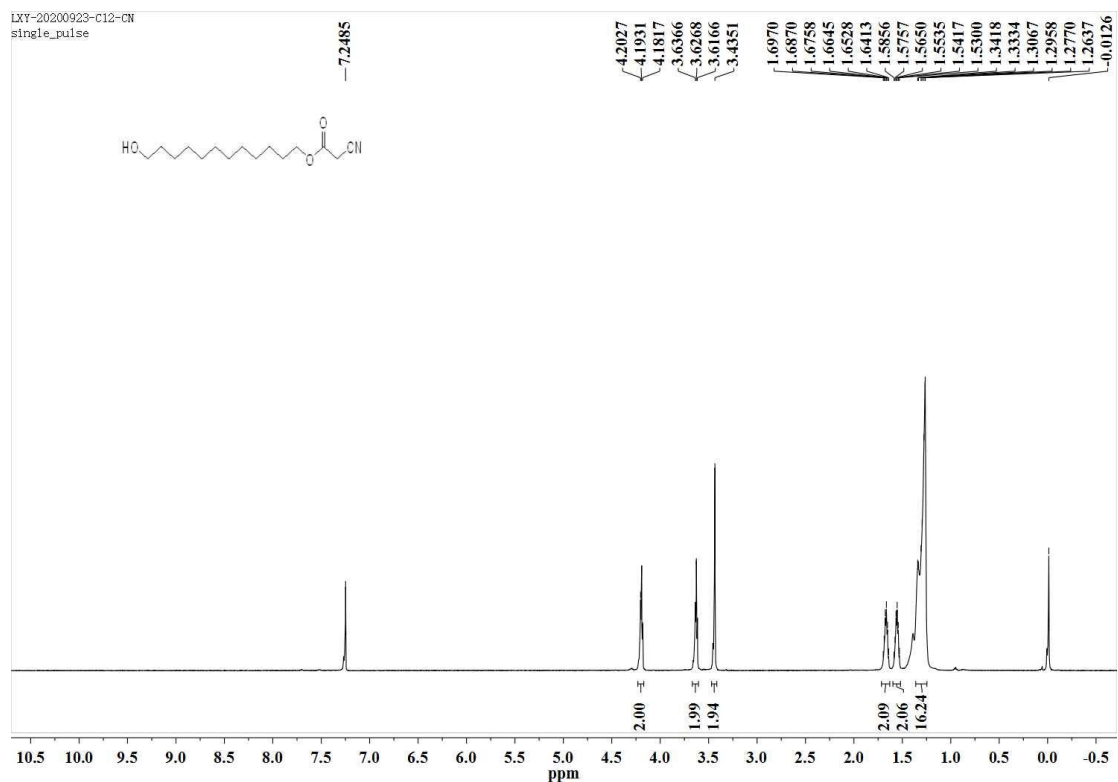

Figure S44  $^1\text{H}$  NMR spectrum of **5** (600 MHz,  $\text{CDCl}_3$ )

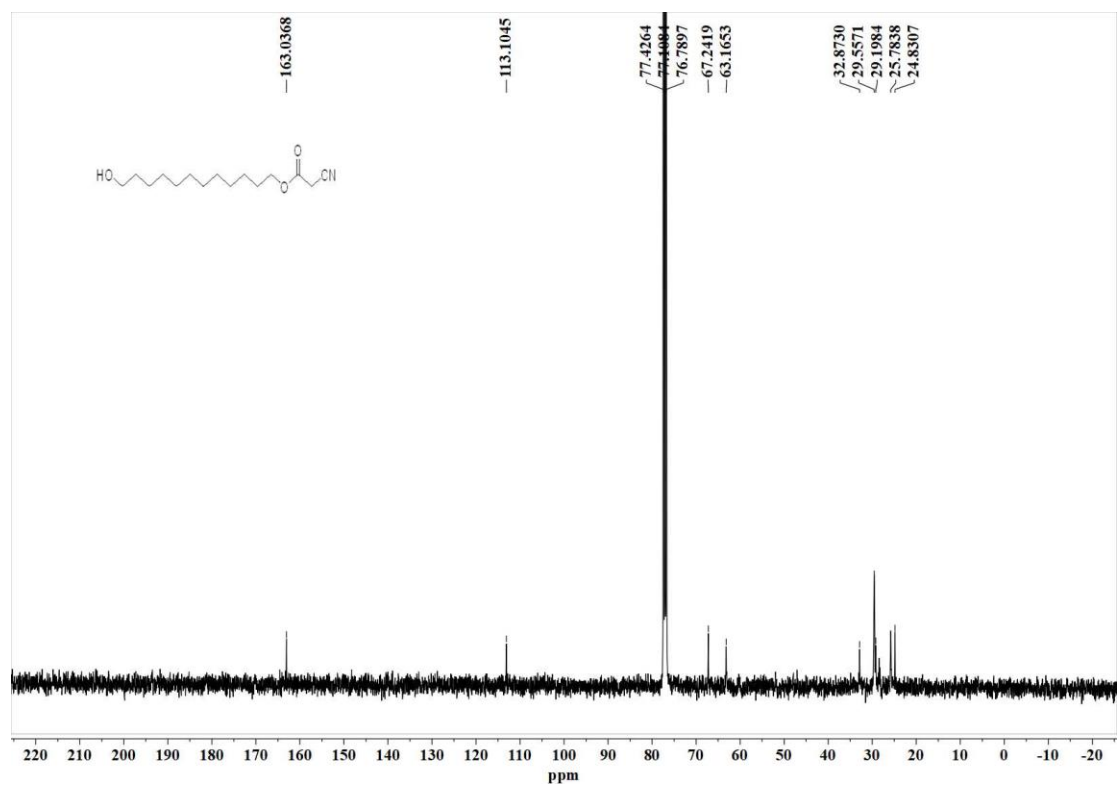

Figure S45  $^{13}\text{C}$  NMR spectrum of **5** (101 MHz,  $\text{CDCl}_3$ ).



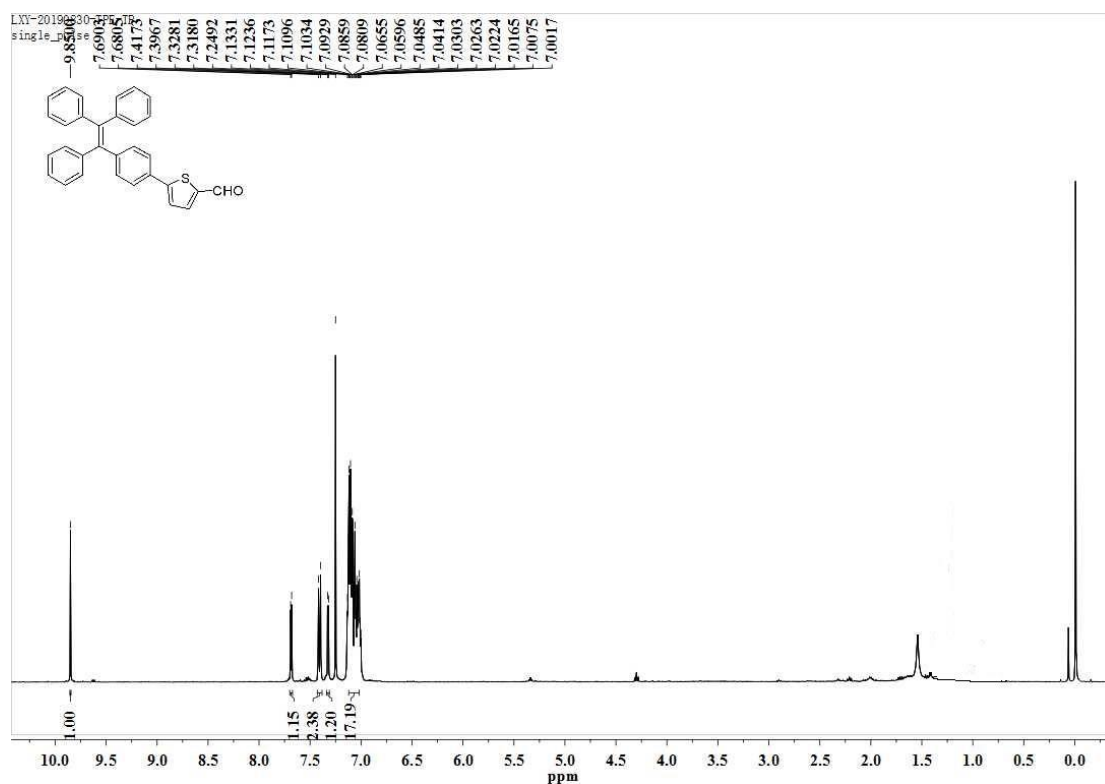

Figure S46  $^1\text{H}$  NMR spectrum of TT-H (400 MHz,  $\text{CDCl}_3$ )

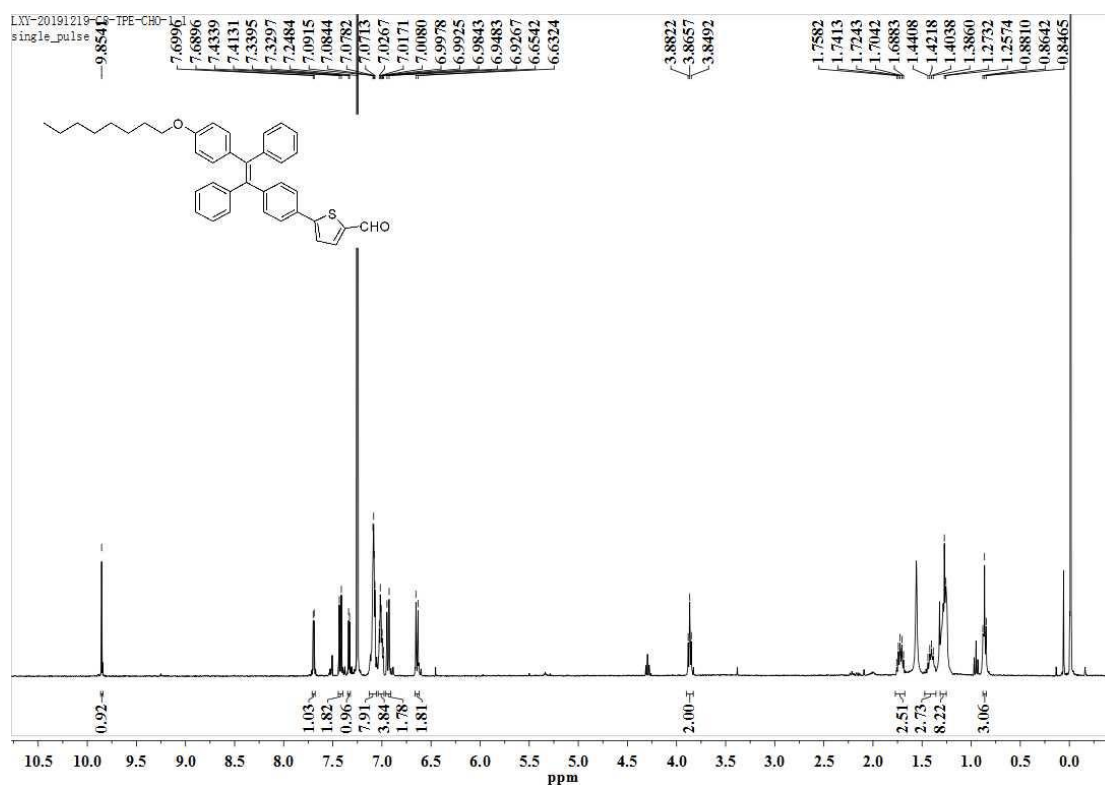

Figure S47  $^1\text{H}$  NMR spectrum of TT-OC<sub>8</sub>H<sub>17</sub> (400 MHz,  $\text{CDCl}_3$ )

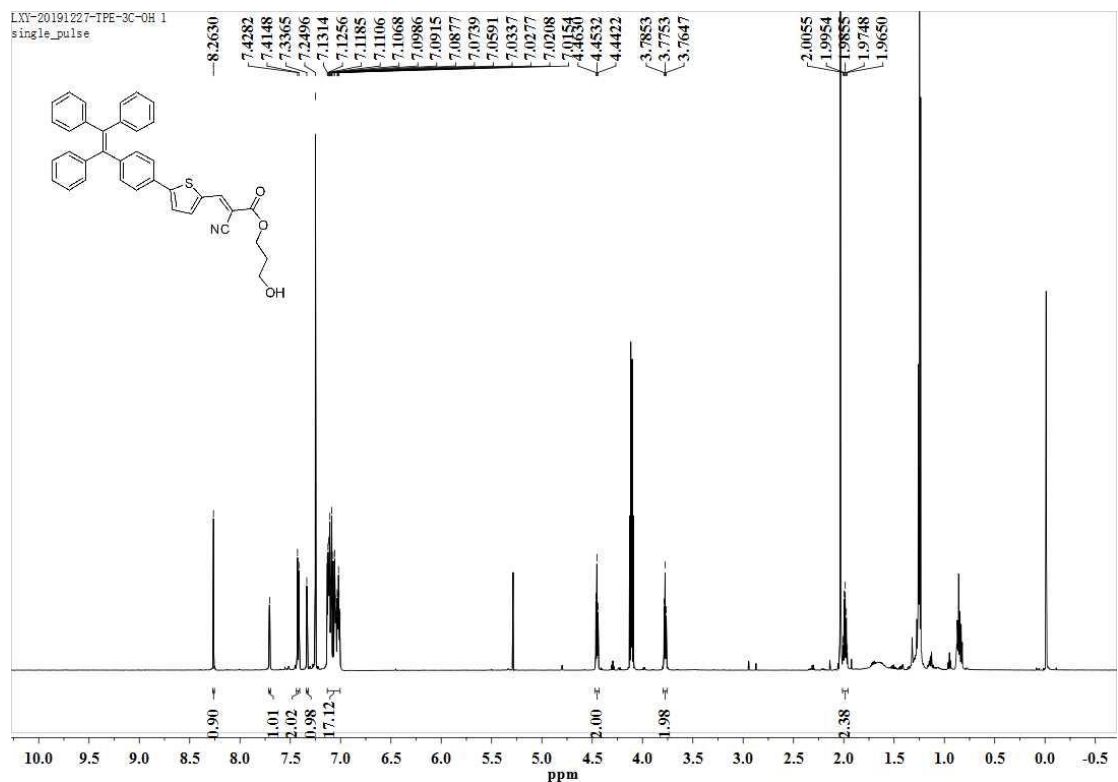

Figure S48  $^1\text{H}$  NMR spectrum of TTC-L-1 (600 MHz,  $\text{CDCl}_3$ )

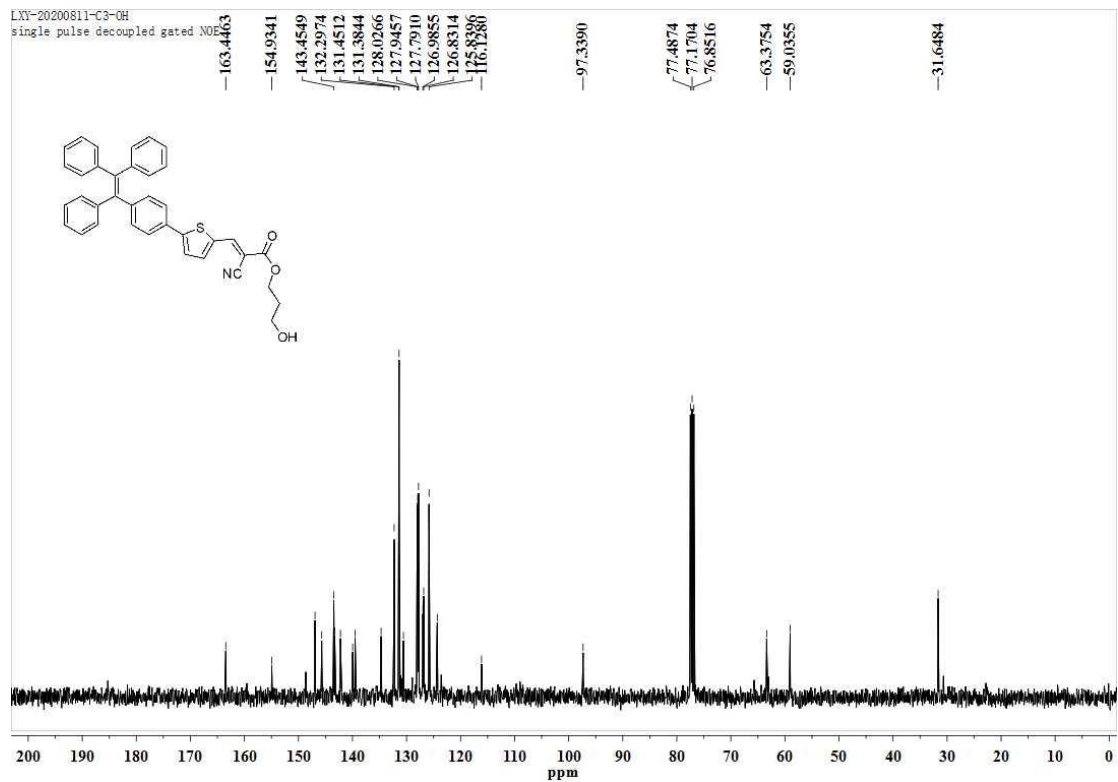

Figure S49  $^{13}\text{C}$  NMR spectrum of TTC-L-1 (101 MHz,  $\text{CDCl}_3$ ).

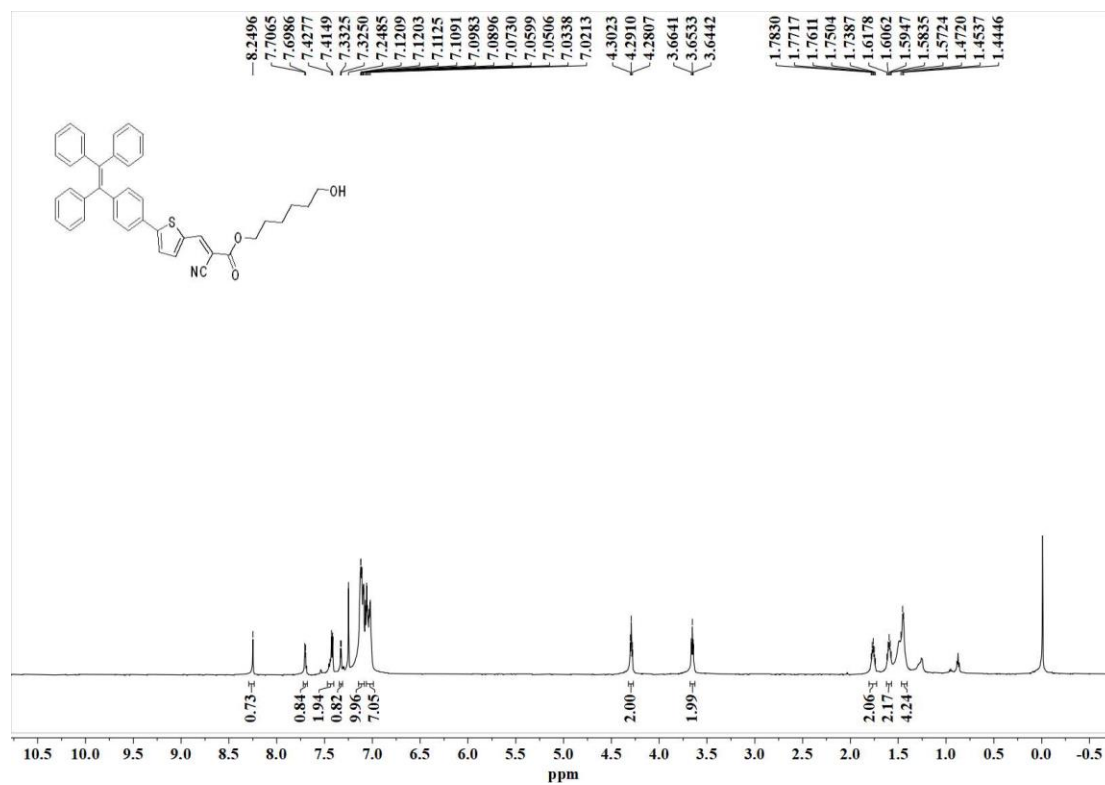

Figure S50 <sup>1</sup>H NMR spectrum of TTC-L-2 (600 MHz, CDCl<sub>3</sub>)

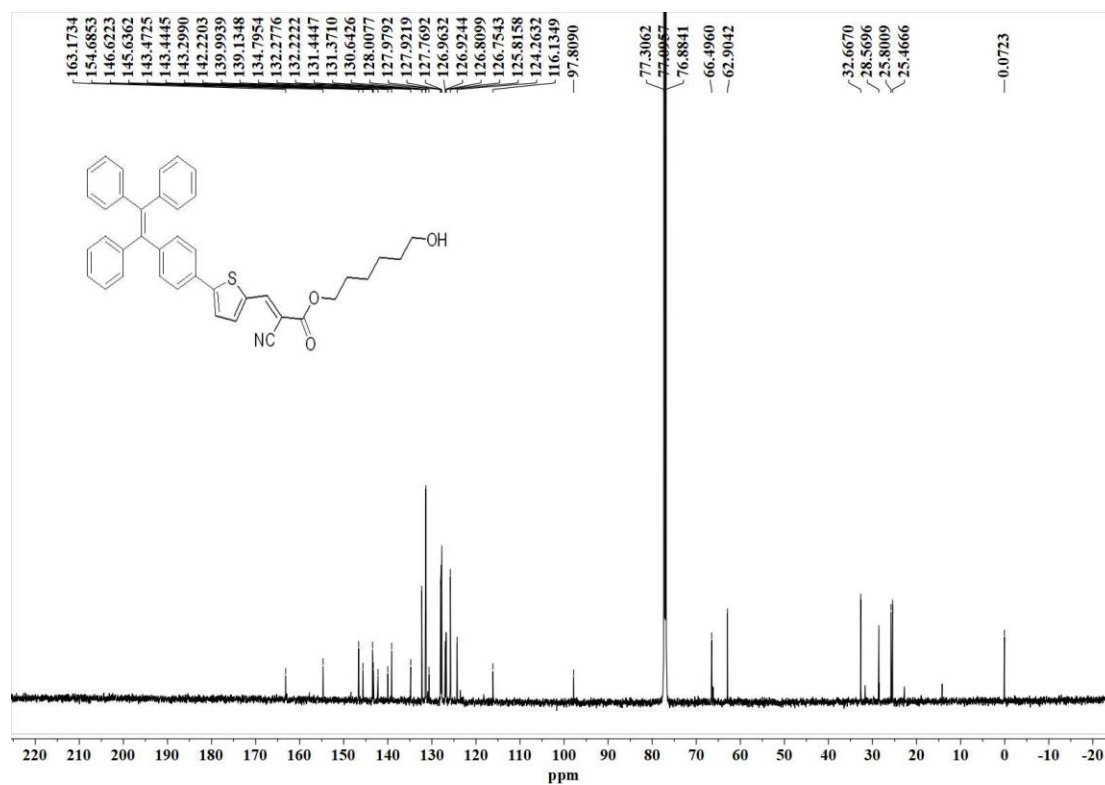

Figure S51 <sup>13</sup>C NMR spectrum of TTC-L-2 (151 MHz, CDCl<sub>3</sub>).

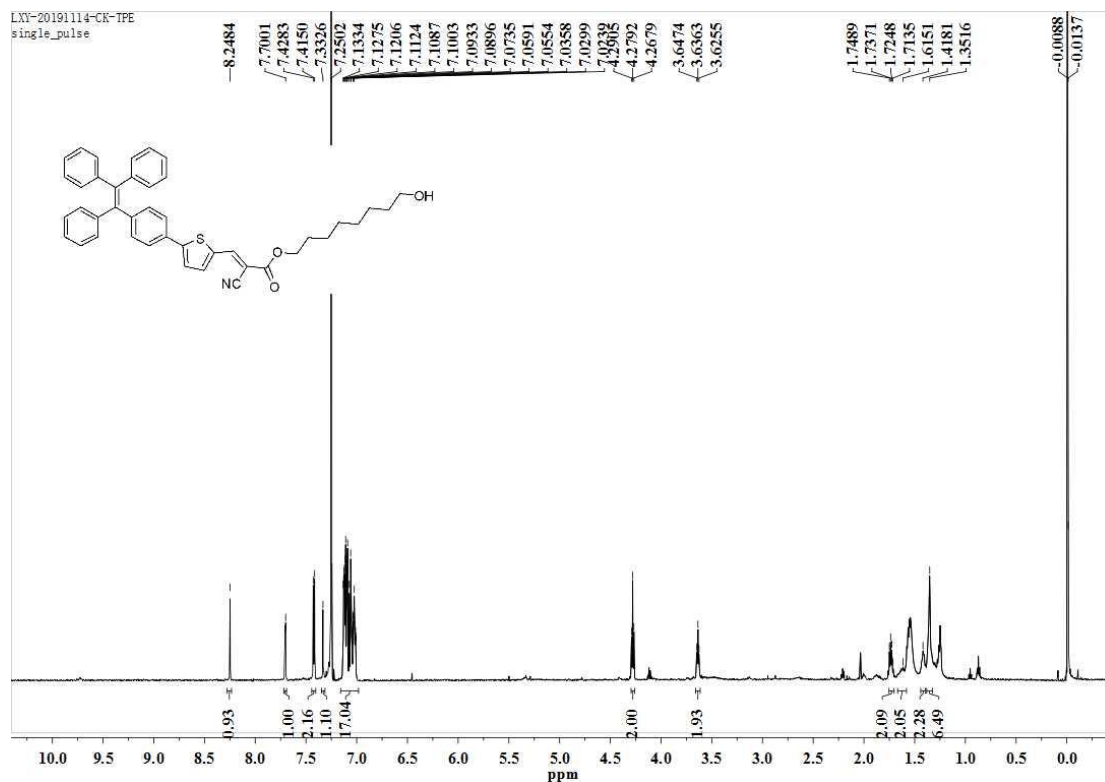

Figure S52  $^1\text{H}$  NMR spectrum of TTC-L-3 (600 MHz,  $\text{CDCl}_3$ )

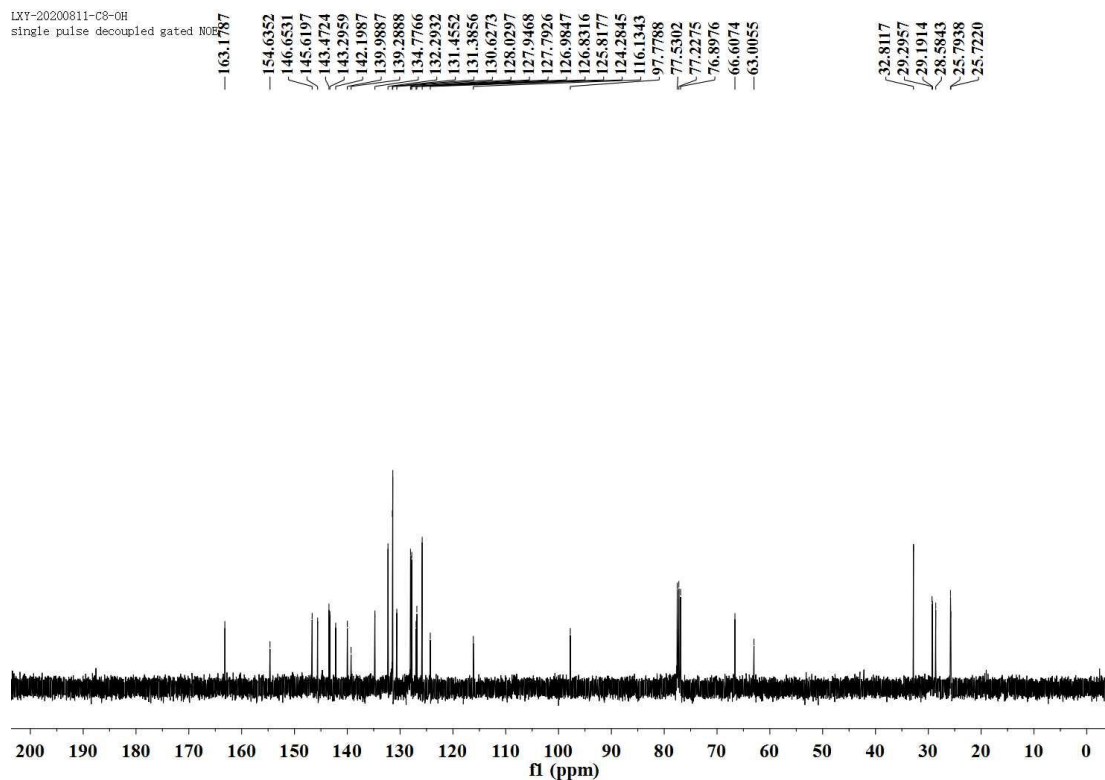

Figure S53  $^{13}\text{C}$  NMR spectrum of TTC-L-3 (101 MHz,  $\text{CDCl}_3$ ).

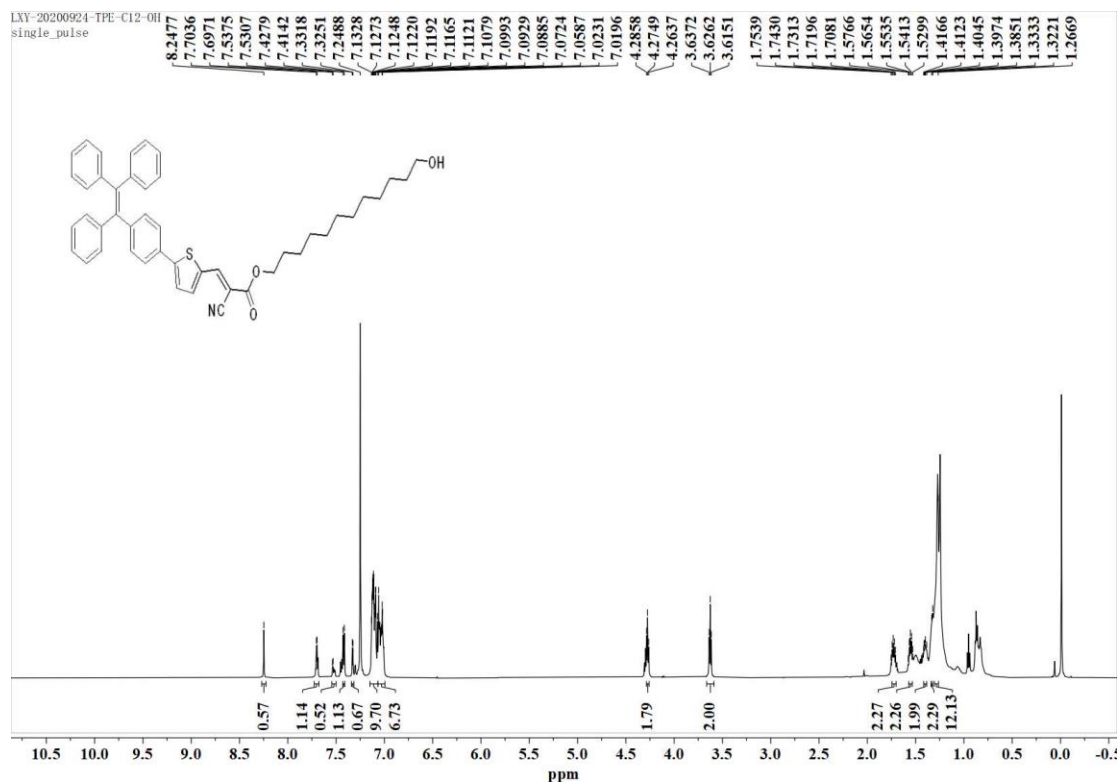

Figure S54 <sup>1</sup>H NMR spectrum of TTC-L-4 (600 MHz, CDCl<sub>3</sub>)

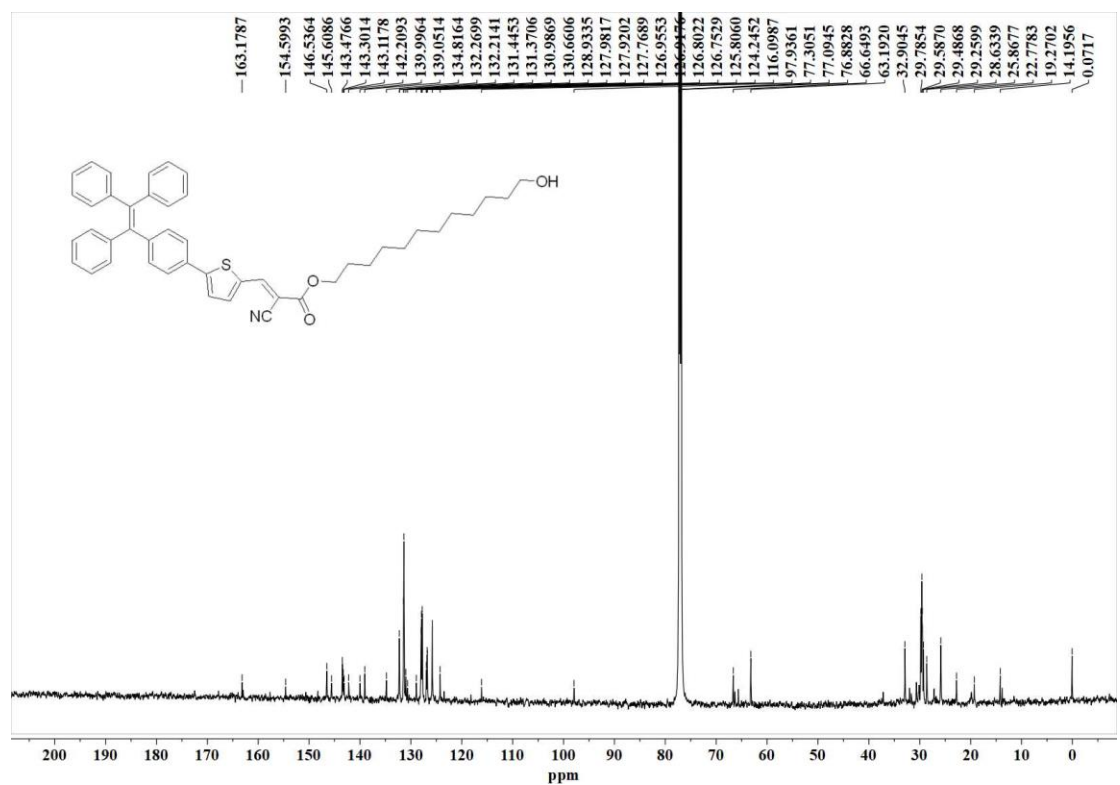

Figure S55 <sup>13</sup>C NMR spectrum of TTC-L-4 (151 MHz, CDCl<sub>3</sub>).

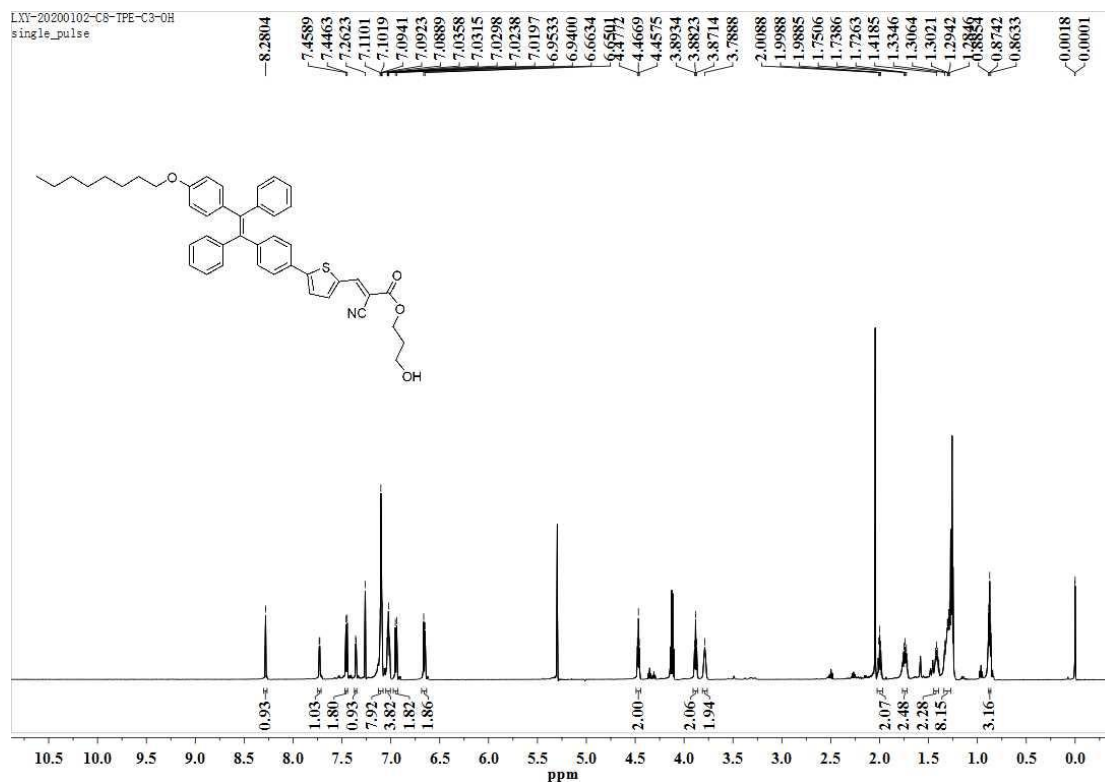

Figure S56  $^1\text{H}$  NMR spectrum of TTC-L-5 (600 MHz,  $\text{CDCl}_3$ )

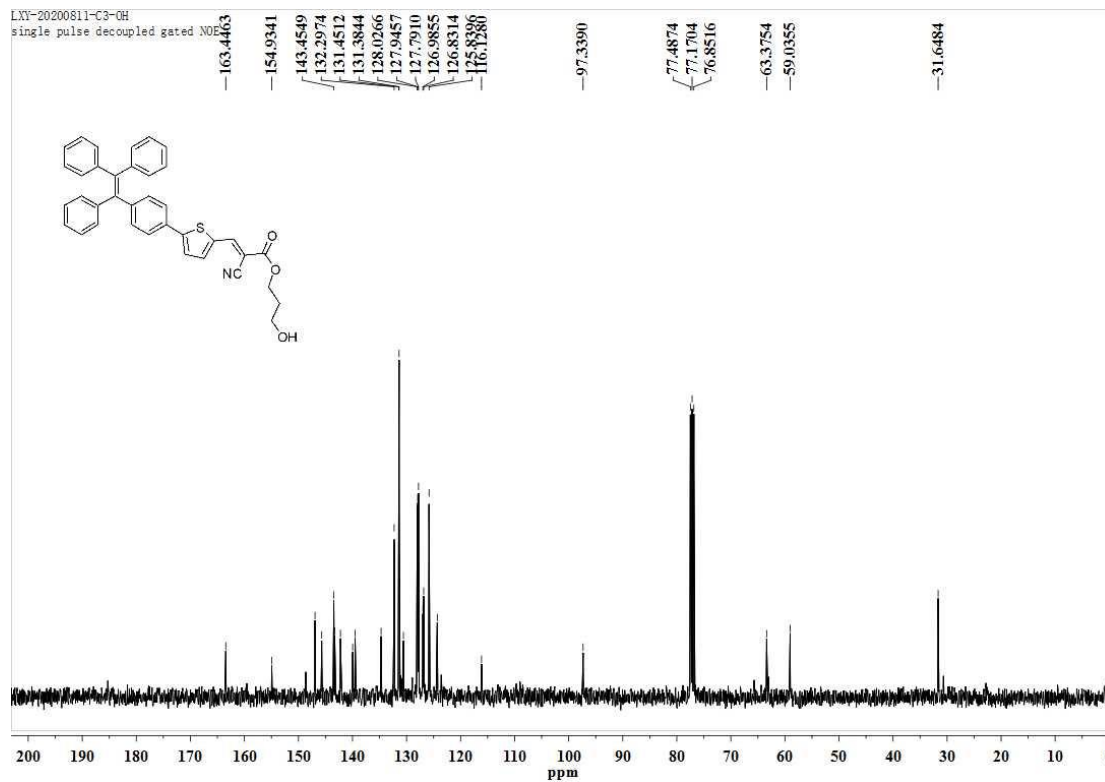

Figure S57  $^{13}\text{C}$  NMR spectrum of TTC-L-5 (101 MHz,  $\text{CDCl}_3$ ).

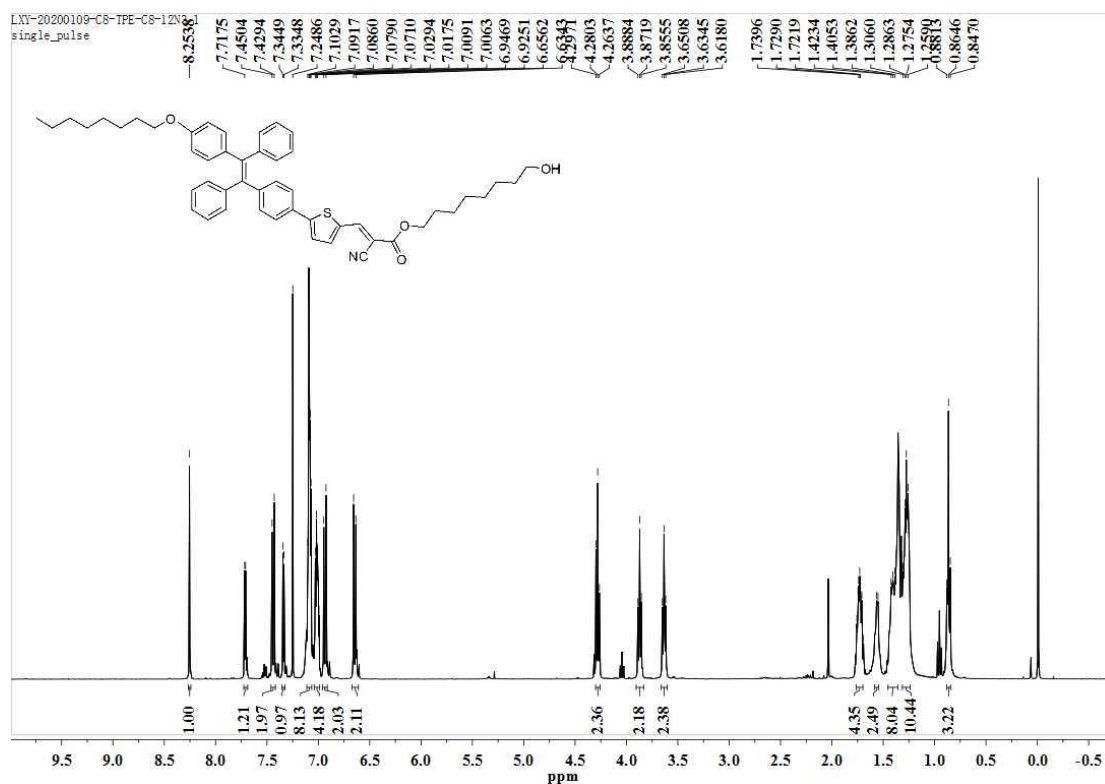

Figure S58  $^1\text{H}$  NMR spectrum of TTC-L-6 (400 MHz,  $\text{CDCl}_3$ )

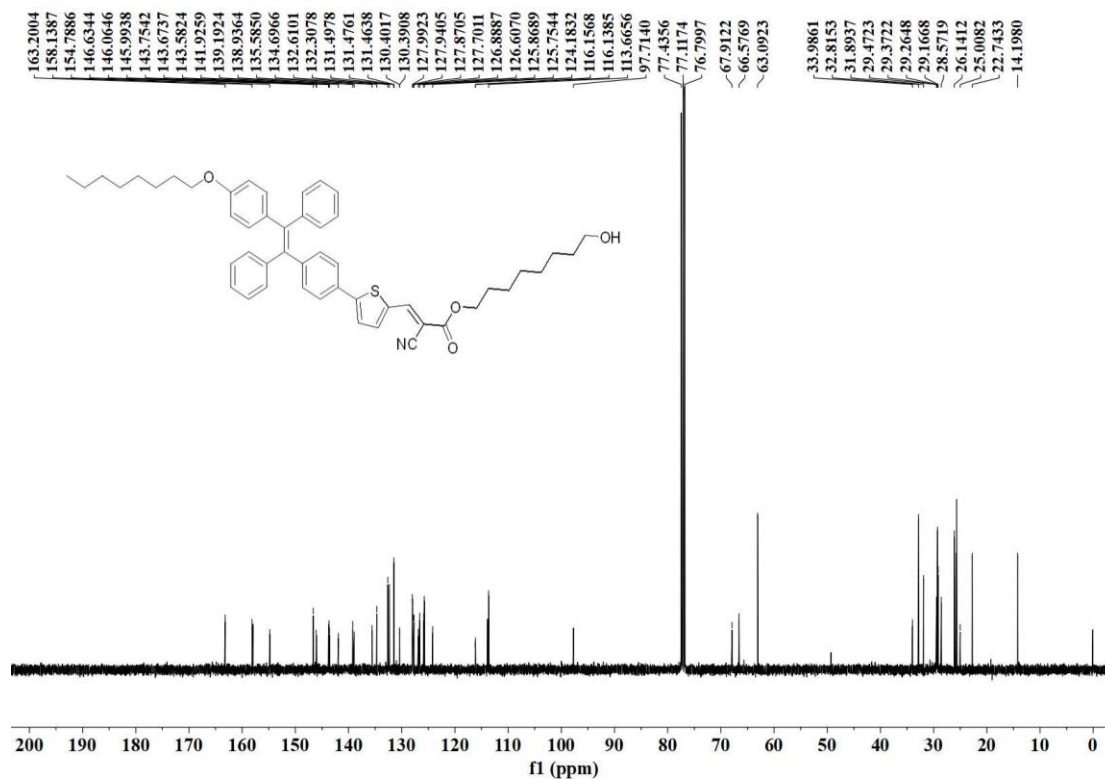

Figure S59  $^{13}\text{C}$  NMR spectrum of TTC-L-6 (101 MHz,  $\text{CDCl}_3$ ).

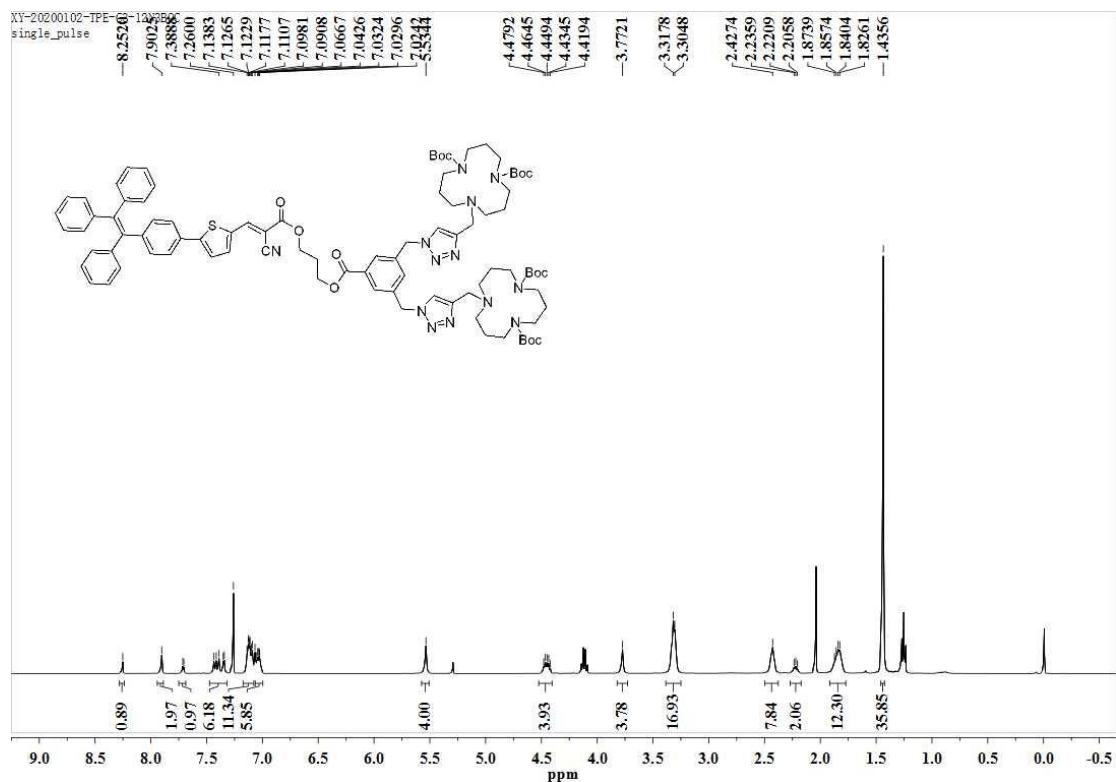

Figure S60  $^1\text{H}$  NMR spectrum of 6 (400 MHz,  $\text{CDCl}_3$ )

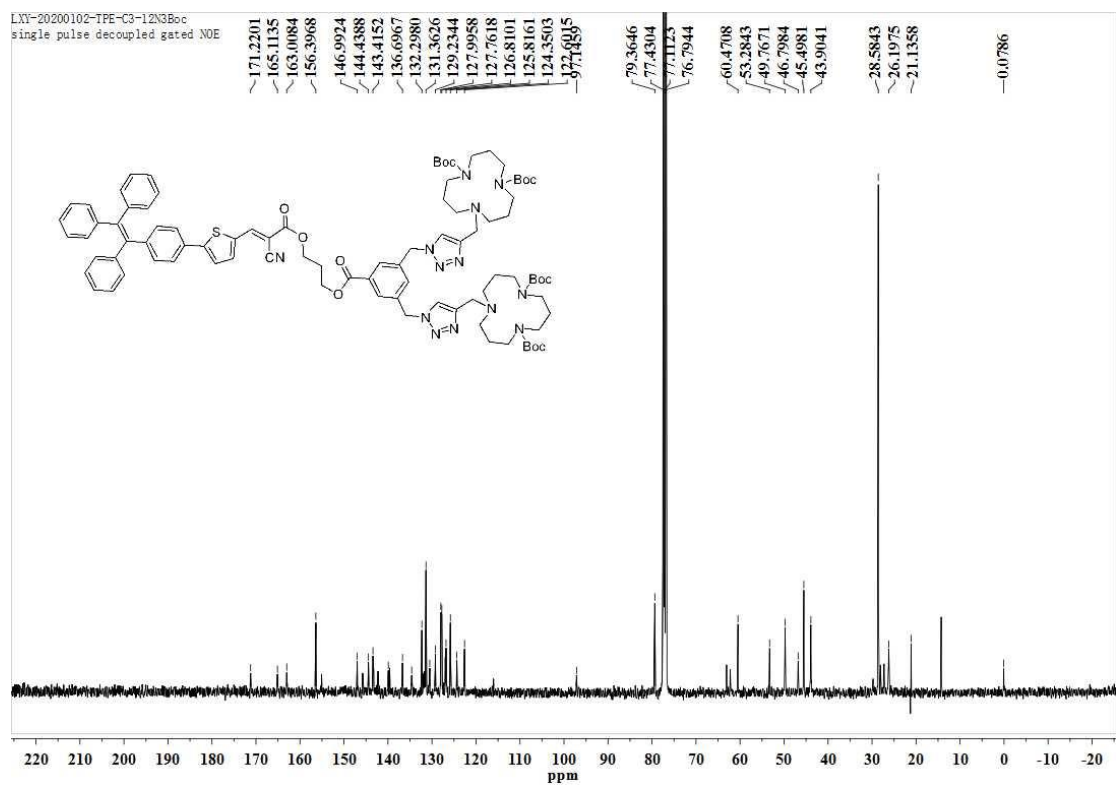

Figure S61  $^{13}\text{C}$  NMR spectrum of 6 (101 MHz,  $\text{CDCl}_3$ ).



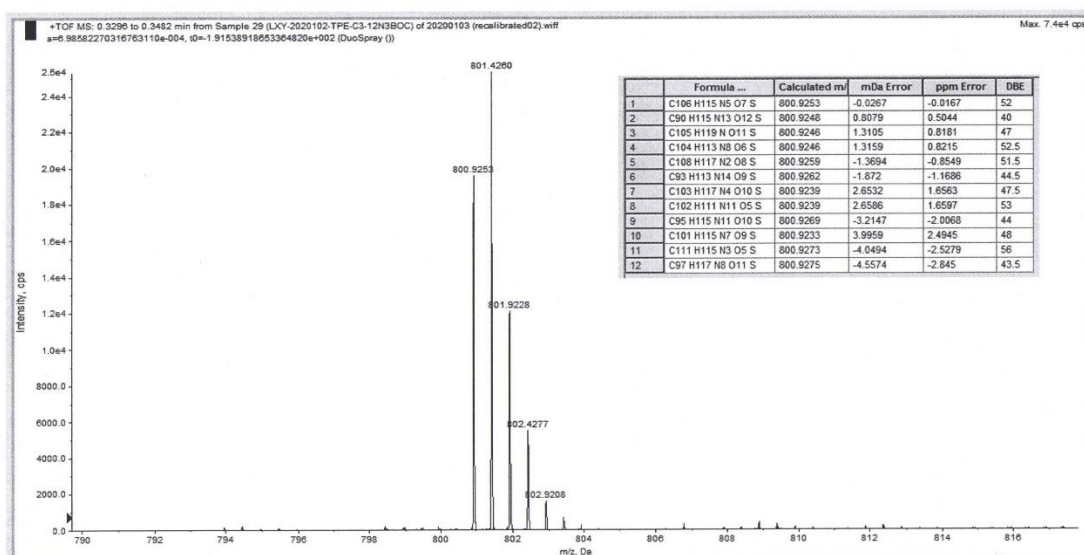

Figure S62 HR-MS spectrum of 6.

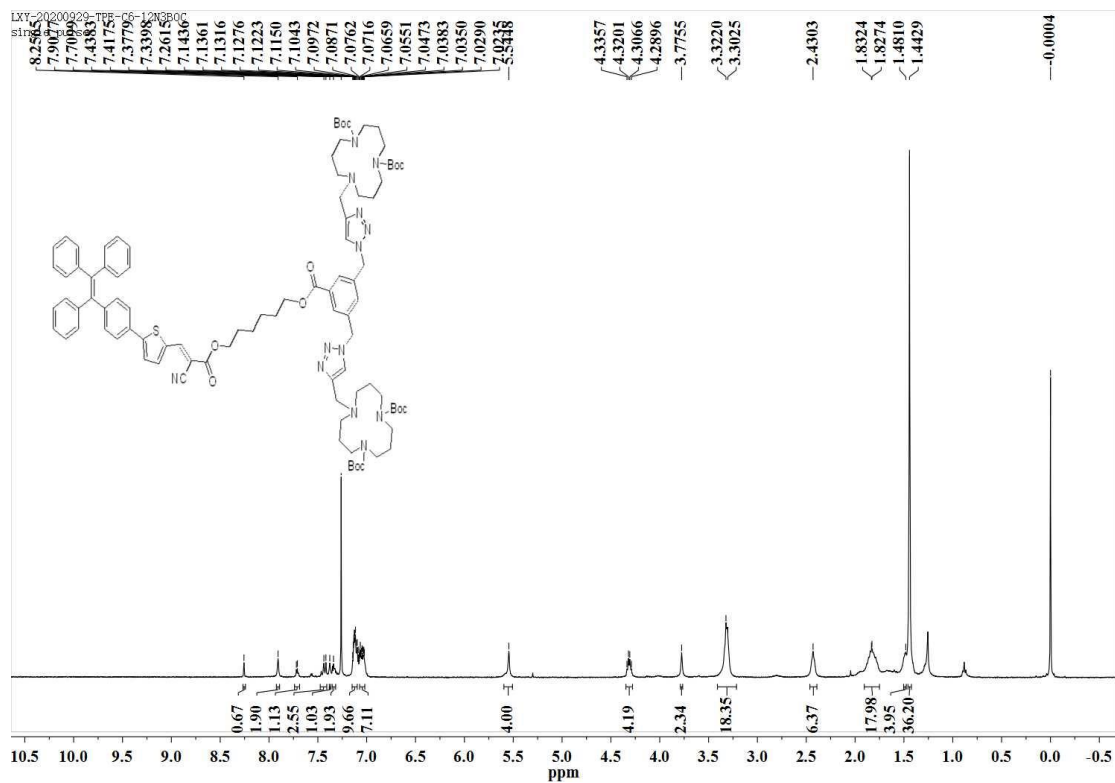

Figure S63 <sup>1</sup>H NMR spectrum of 7 (400 MHz, CDCl<sub>3</sub>)

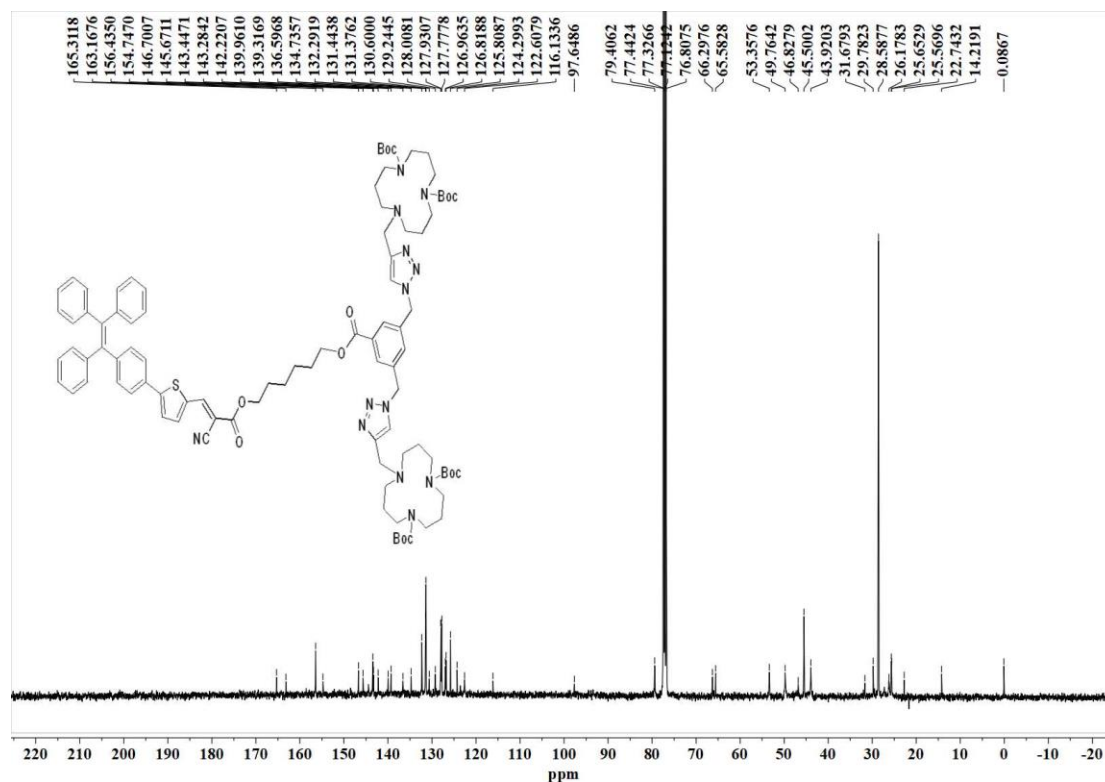

Figure S64  $^{13}\text{C}$  NMR spectrum of 7 (101 MHz,  $\text{CDCl}_3$ ).

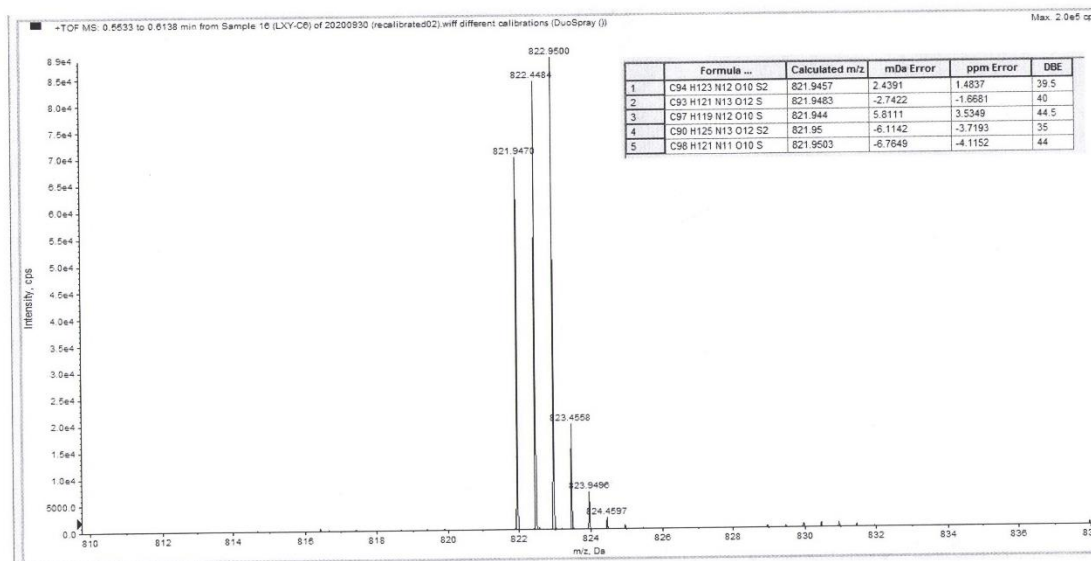

Figure S65 HR-MS spectrum of 7.

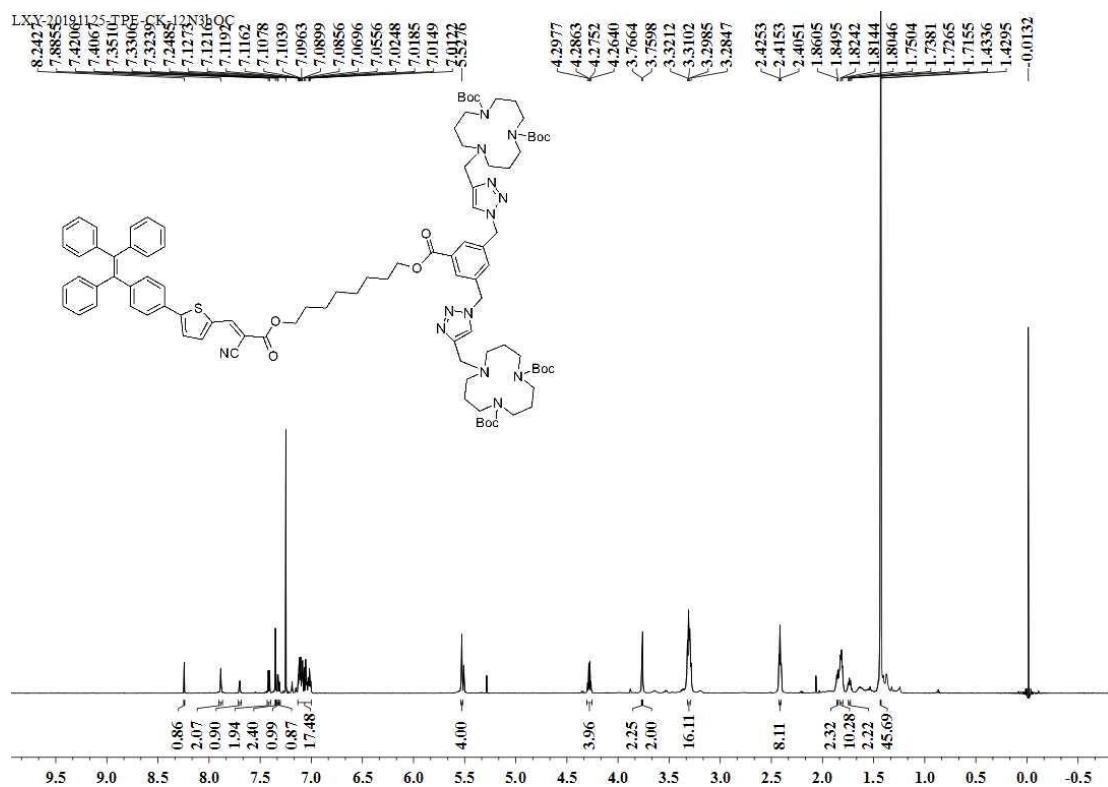

Figure S66  $^1\text{H}$  NMR spectrum of **8** (600 MHz,  $\text{CDCl}_3$ )

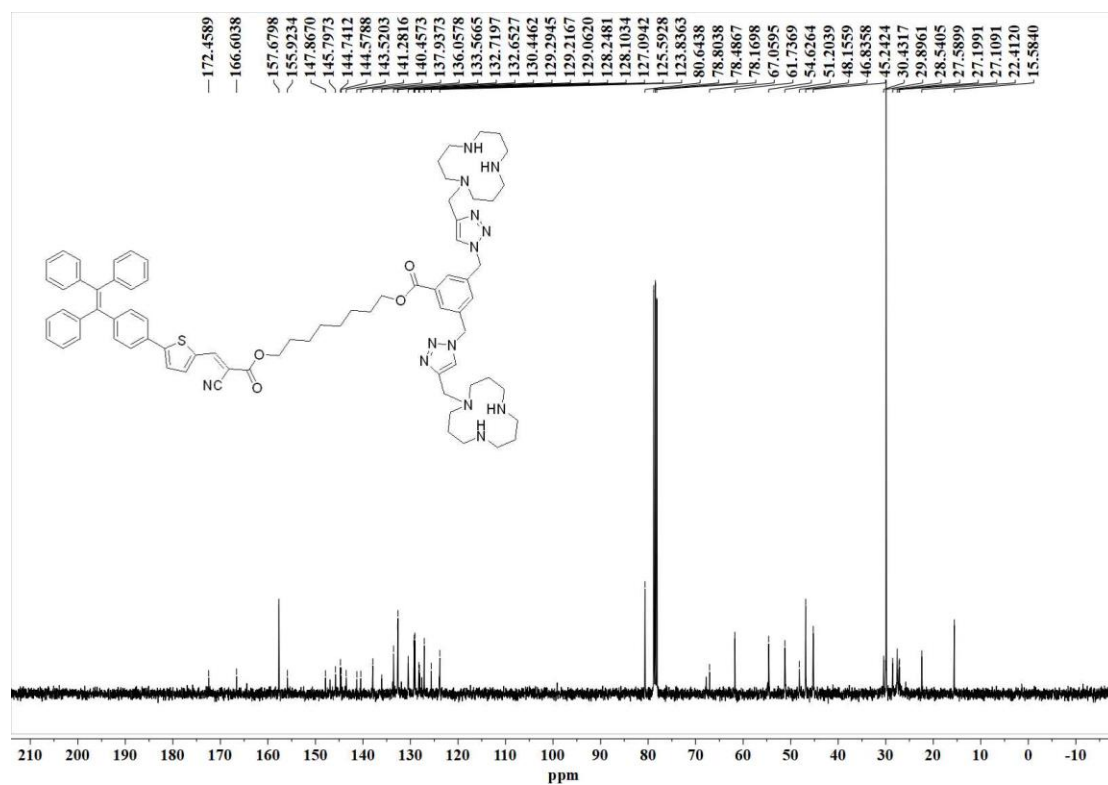

Figure S67  $^{13}\text{C}$  NMR spectrum of **8** (101 MHz,  $\text{CDCl}_3$ ).

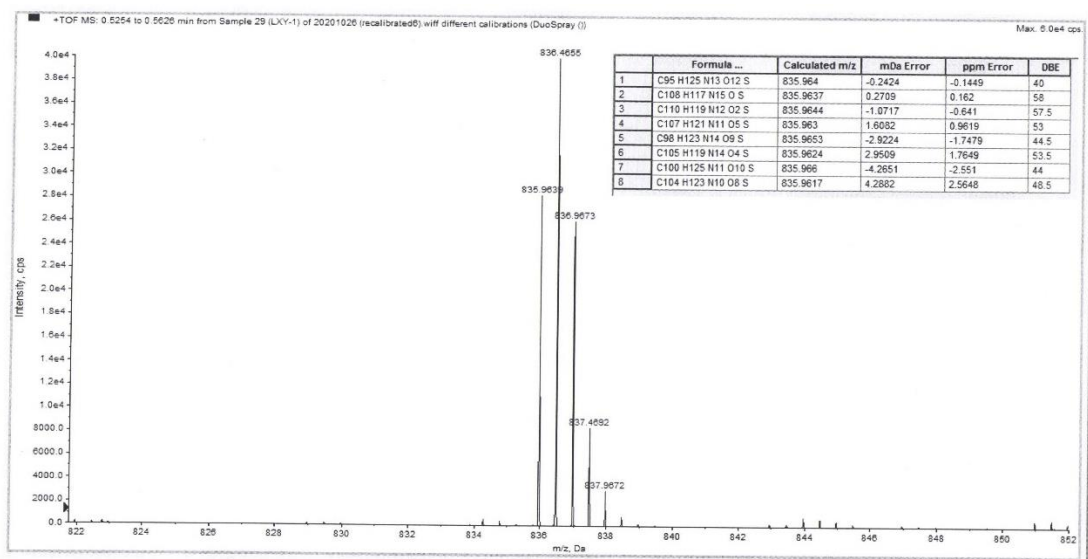

Figure S68 HR-MS spectrum of **8**.

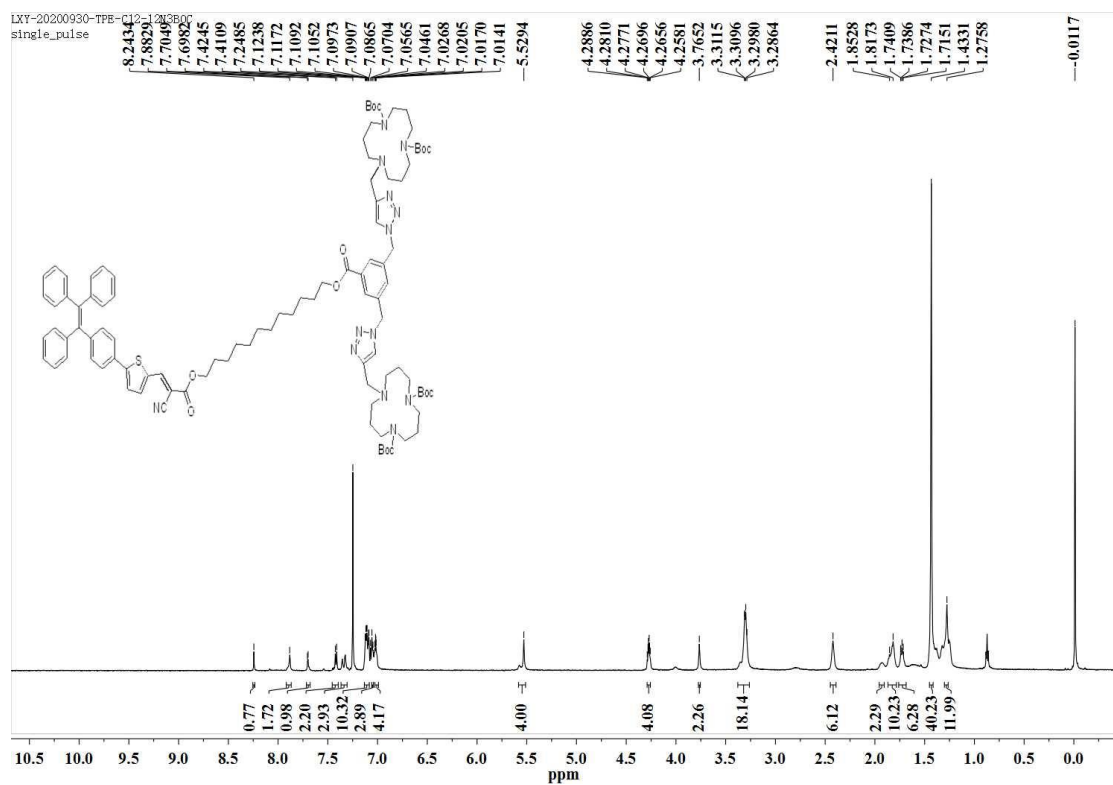

Figure S69  $^1\text{H}$  NMR spectrum of **9** (600 MHz,  $\text{CDCl}_3$ )

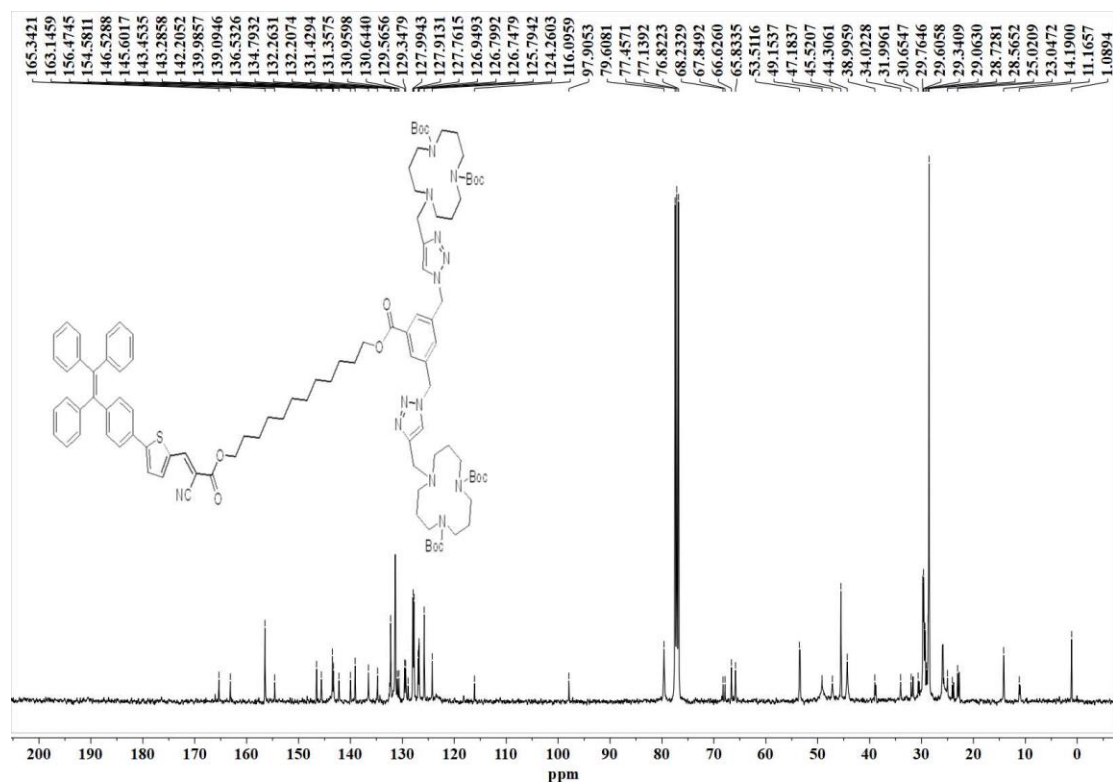

Figure S70  $^{13}\text{C}$  NMR spectrum of **9** (101 MHz,  $\text{CDCl}_3$ ).

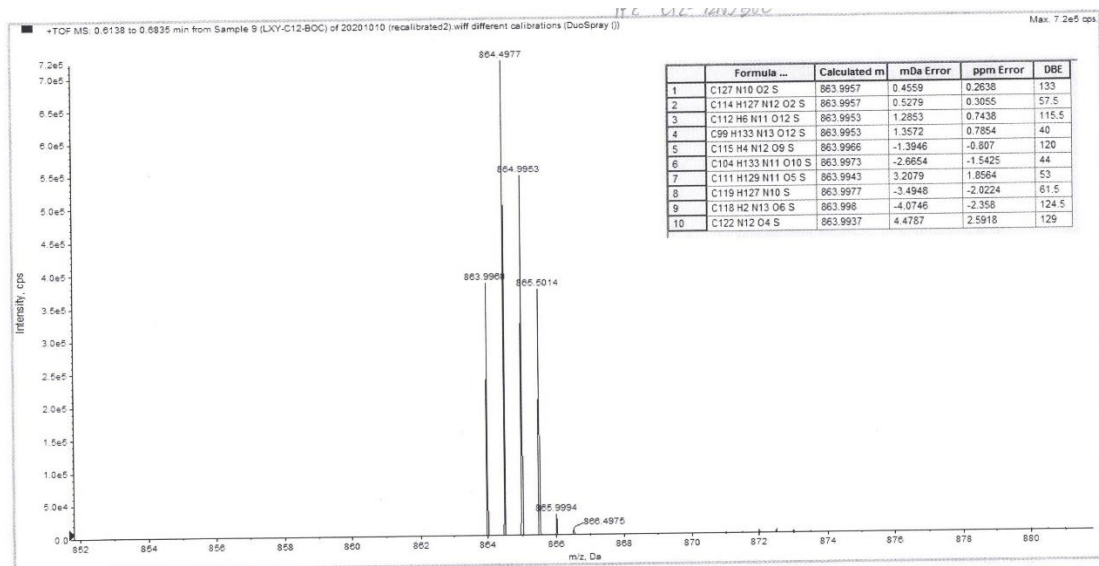

Figure S71 HR-MS spectrum of **9**.

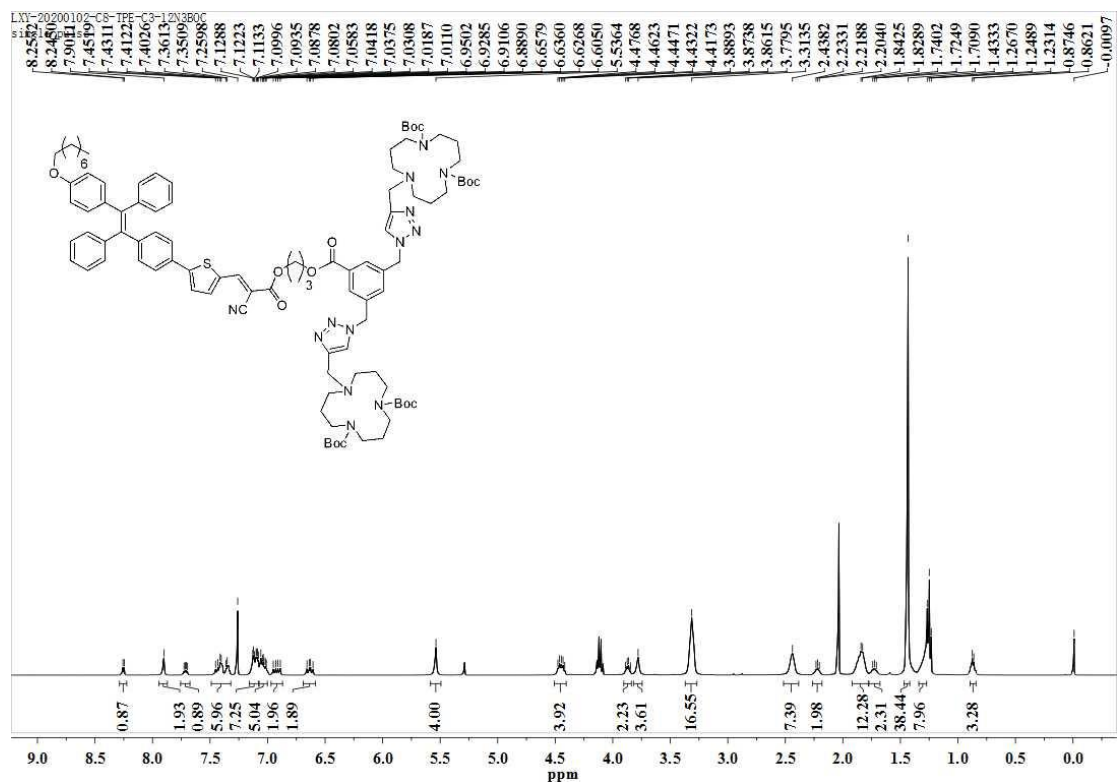

Figure S72  $^1\text{H}$  NMR spectrum of **10** (400 MHz,  $\text{CDCl}_3$ )

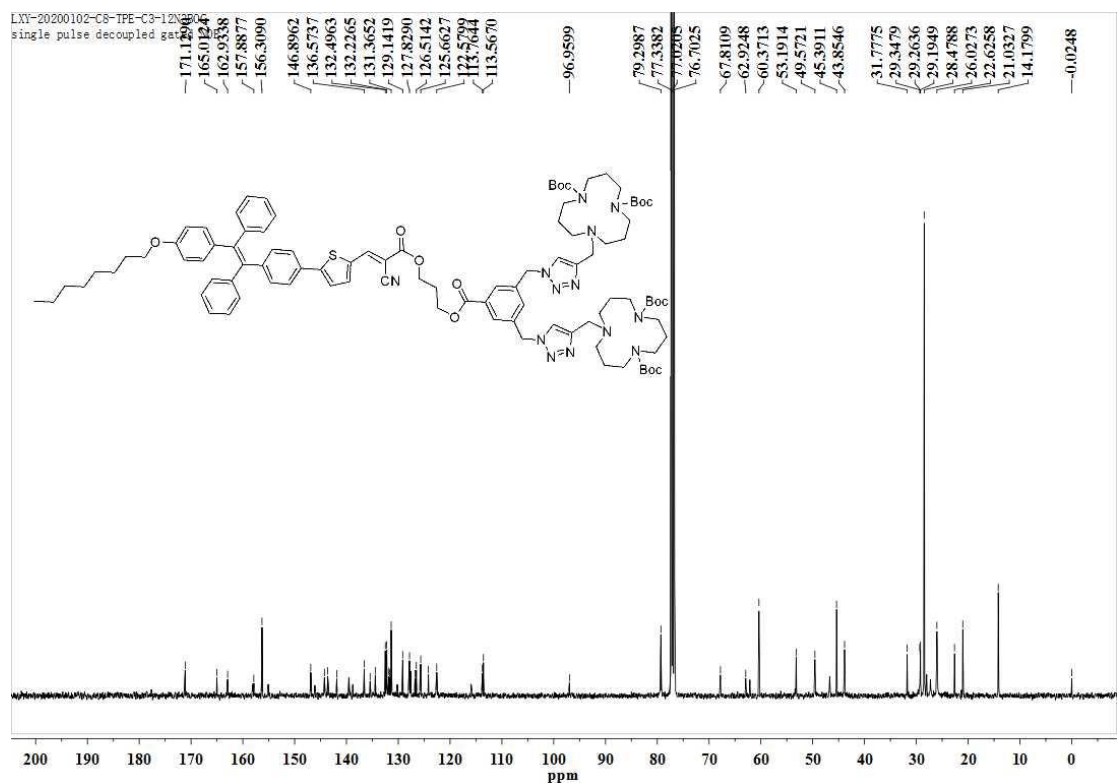

Figure S73  $^{13}\text{C}$  NMR spectrum of **10** (101 MHz,  $\text{CDCl}_3$ ).

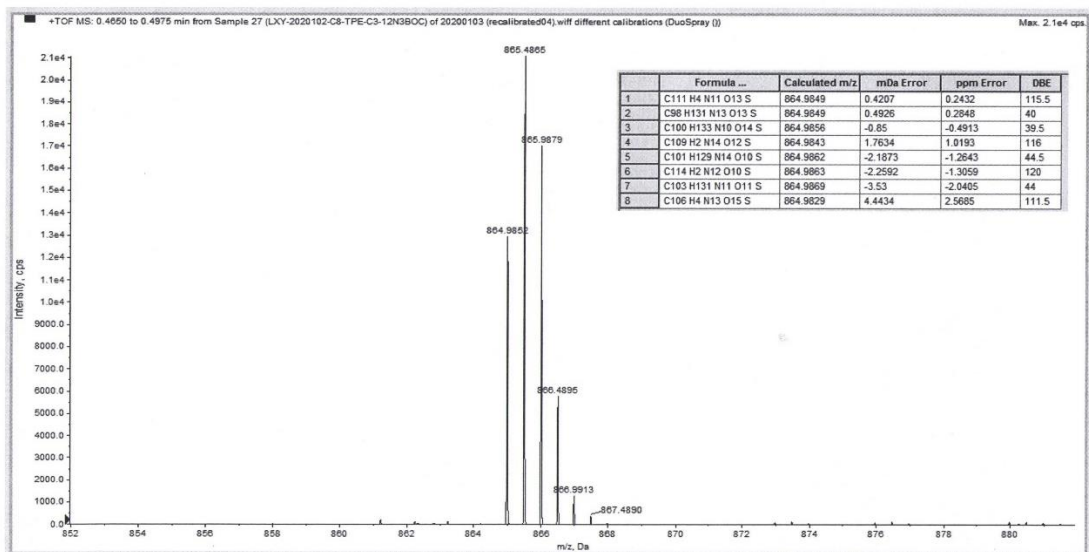

Figure S74 HR-MS spectrum of 10.

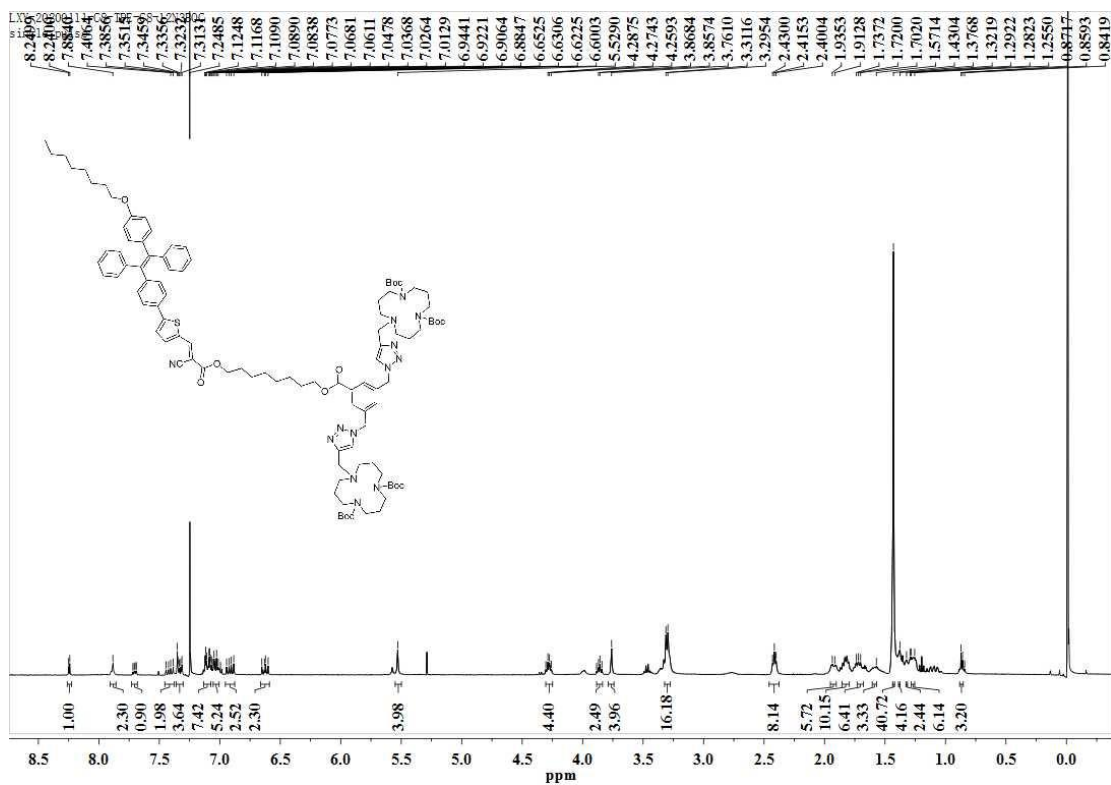

Figure S75 <sup>1</sup>H NMR spectrum of 11 (400 MHz, CDCl<sub>3</sub>)

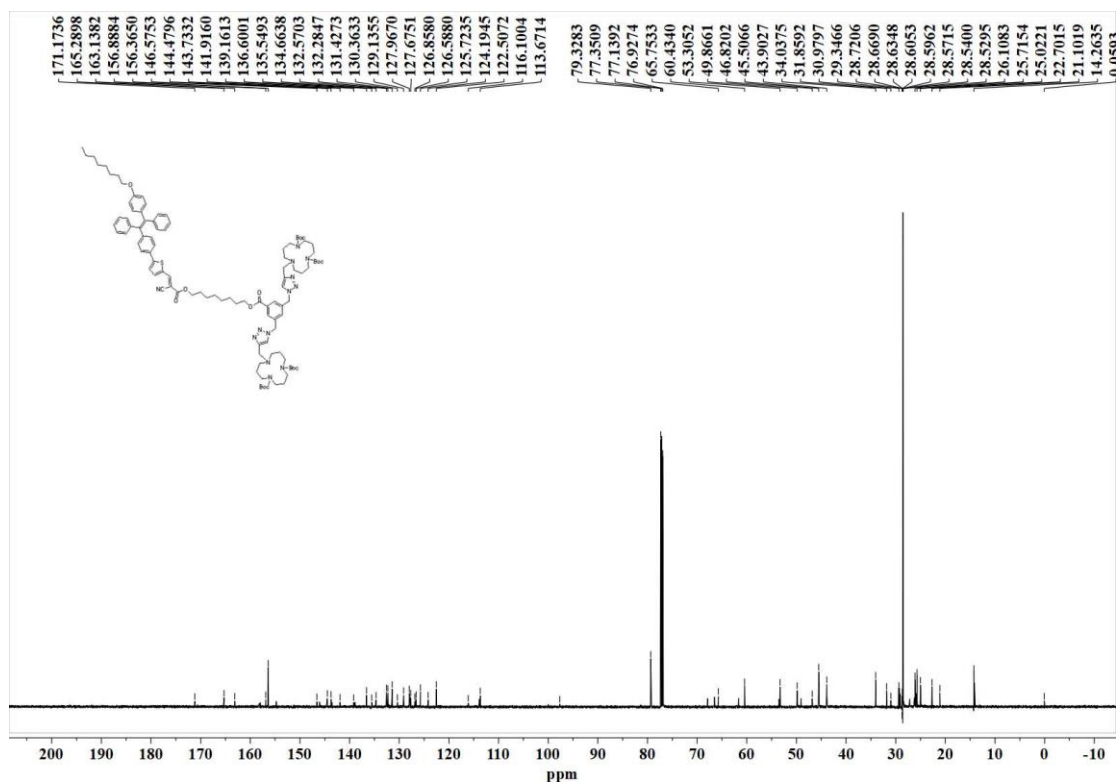

Figure S76  $^{13}\text{C}$  NMR spectrum of **11** (151 MHz,  $\text{CDCl}_3$ ).

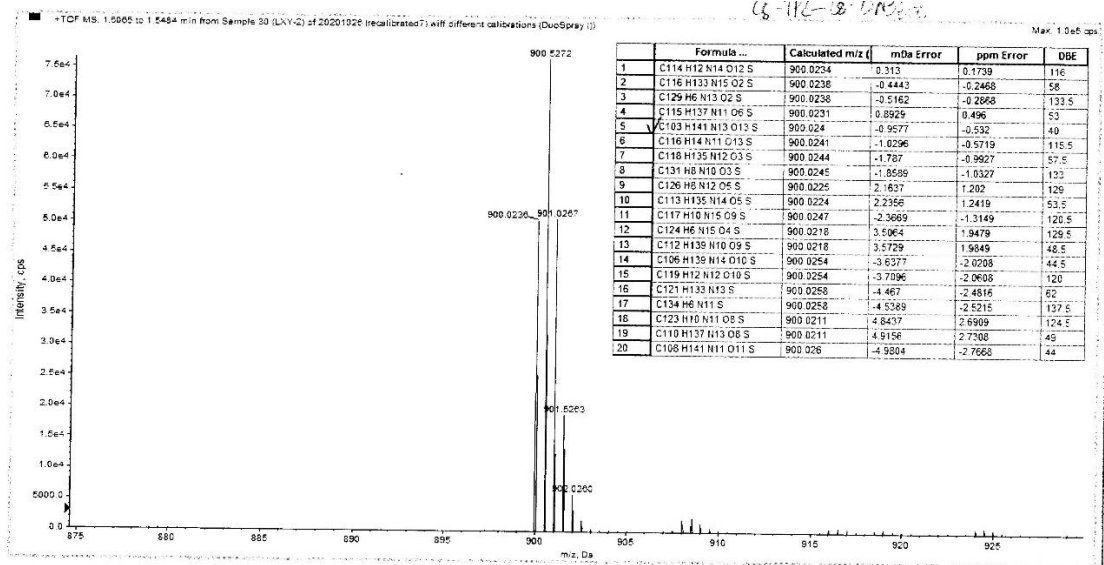

Figure S77 HR-MS spectrum of **11**.



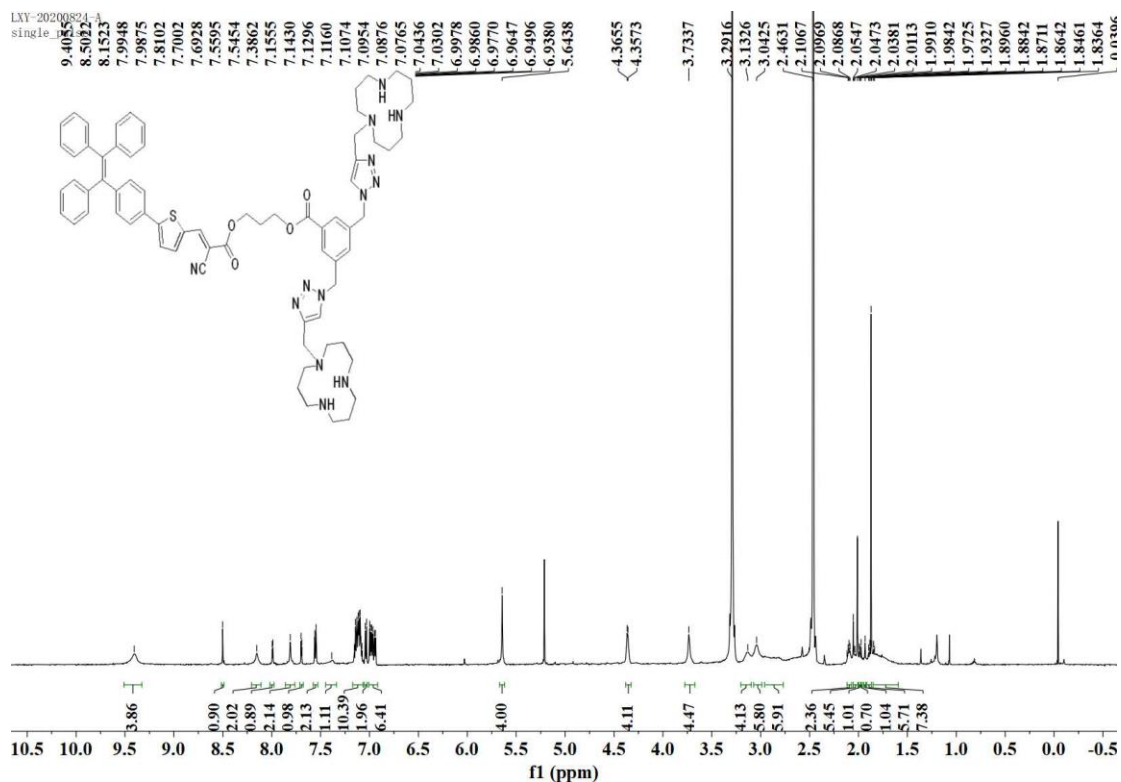

Figure S78 <sup>1</sup>H NMR spectrum of TTC-L-M-1 (600 MHz, DMSO-*d*<sub>6</sub>)

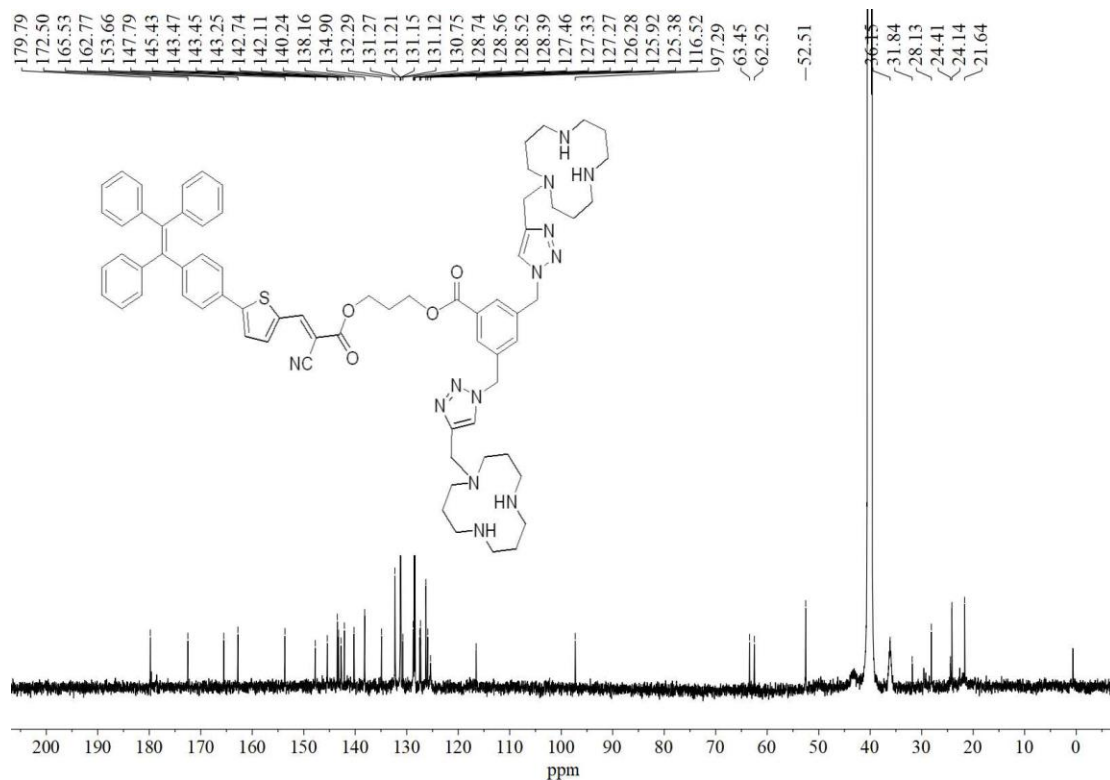

Figure S79 <sup>13</sup>C NMR spectrum of TTC-L-M-1 (151 MHz, DMSO-*d*<sub>6</sub>)

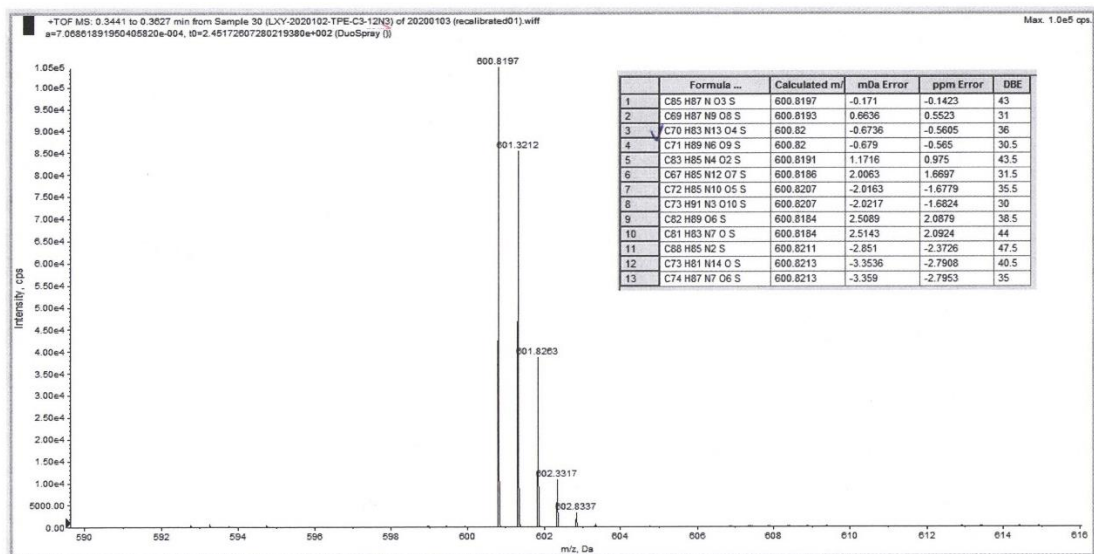

Figure S80 HR-MS spectrum of TTC-L-M-1.

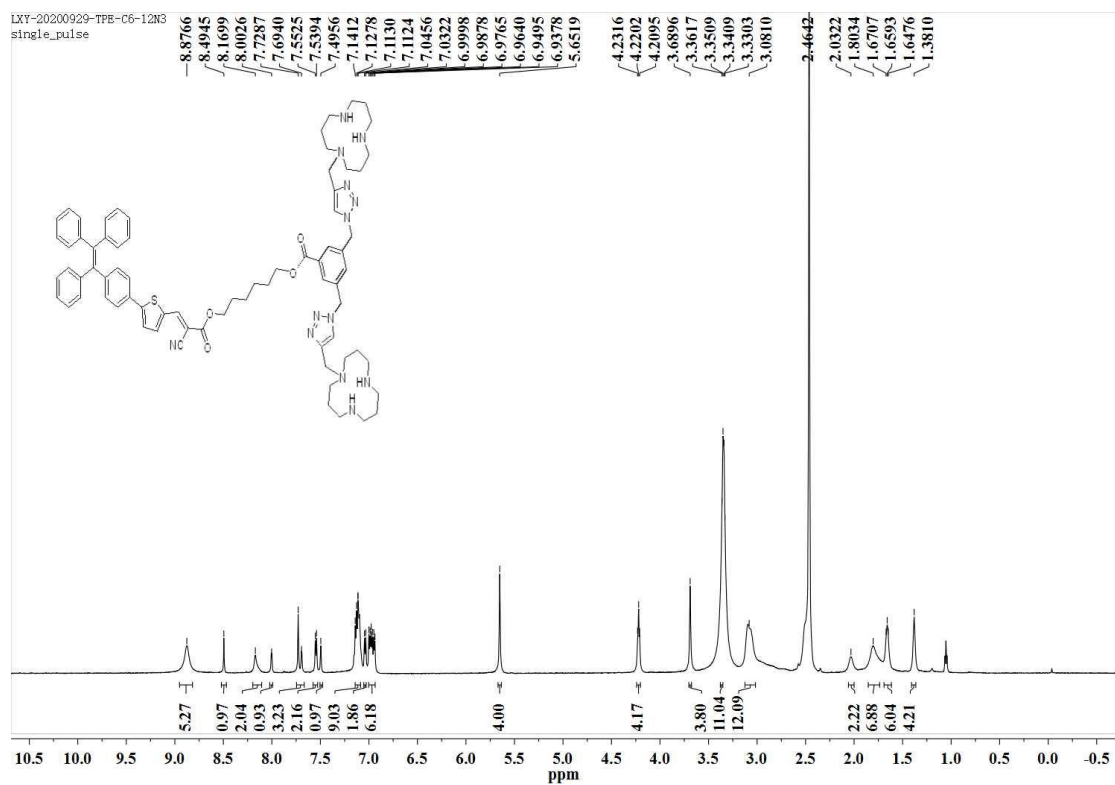

Figure S81 <sup>1</sup>H NMR spectrum of TTC-L-M-2 (600 MHz, DMSO-d<sub>6</sub>)

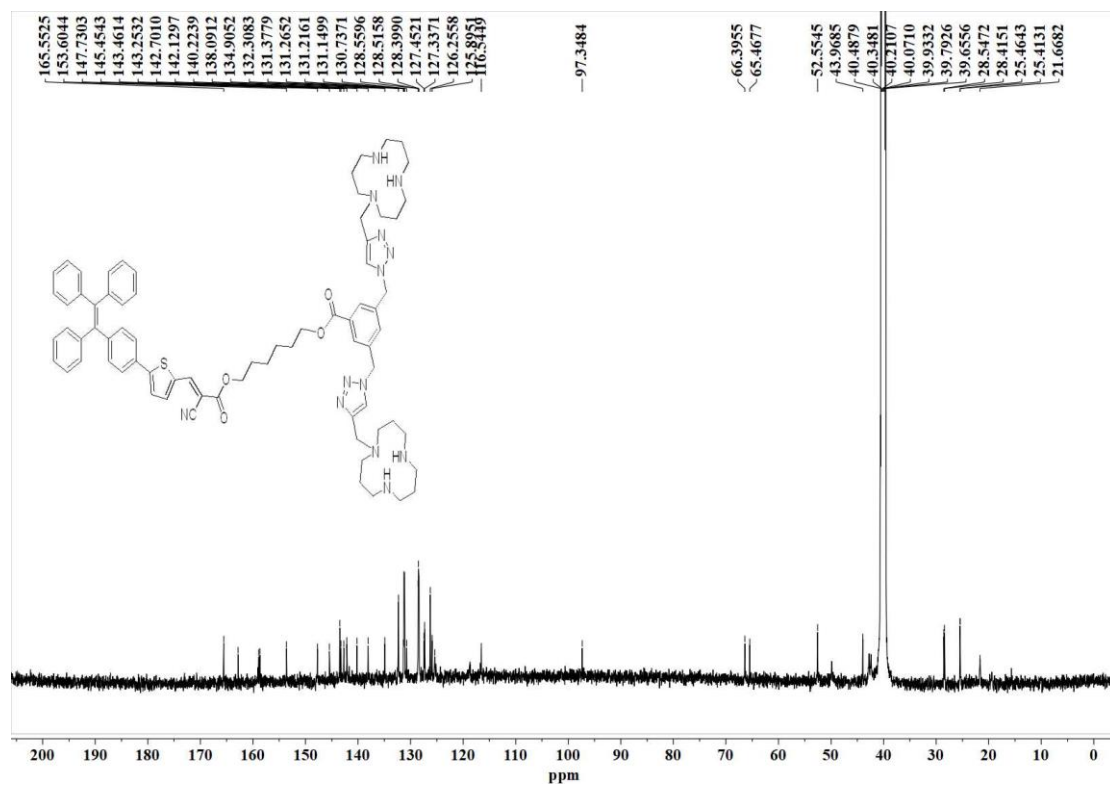

Figure S82  $^{13}\text{C}$  NMR spectrum of TTC-L-M-2 (151 MHz,  $\text{DMSO-}d_6$ )

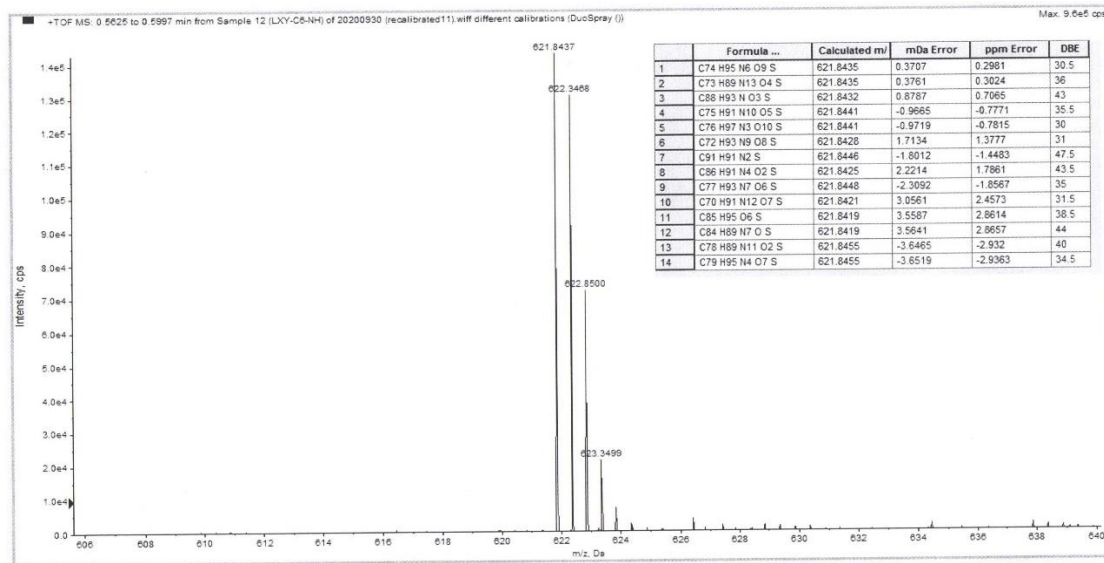

Figure S83 HR-MS spectrum of TTC-L-M-2.

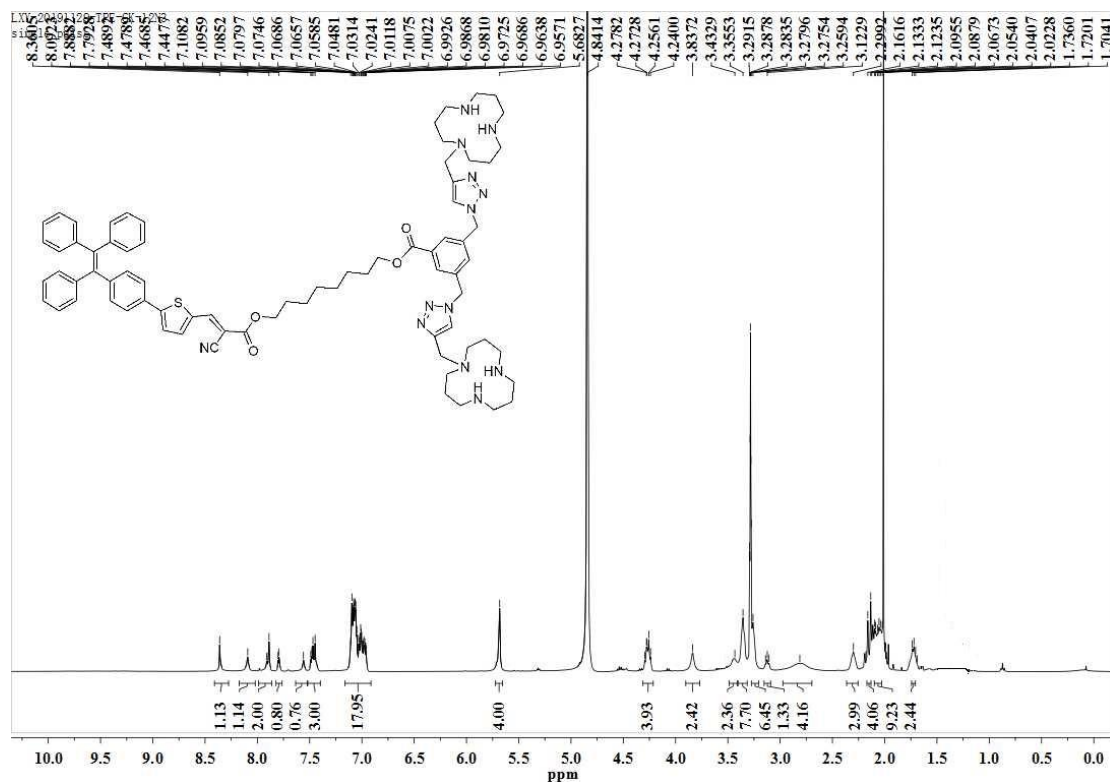

**Figure S84**  $^1\text{H}$  NMR spectrum of TTC-L-M-3 (400 MHz,  $\text{CD}_3\text{OD}$ )

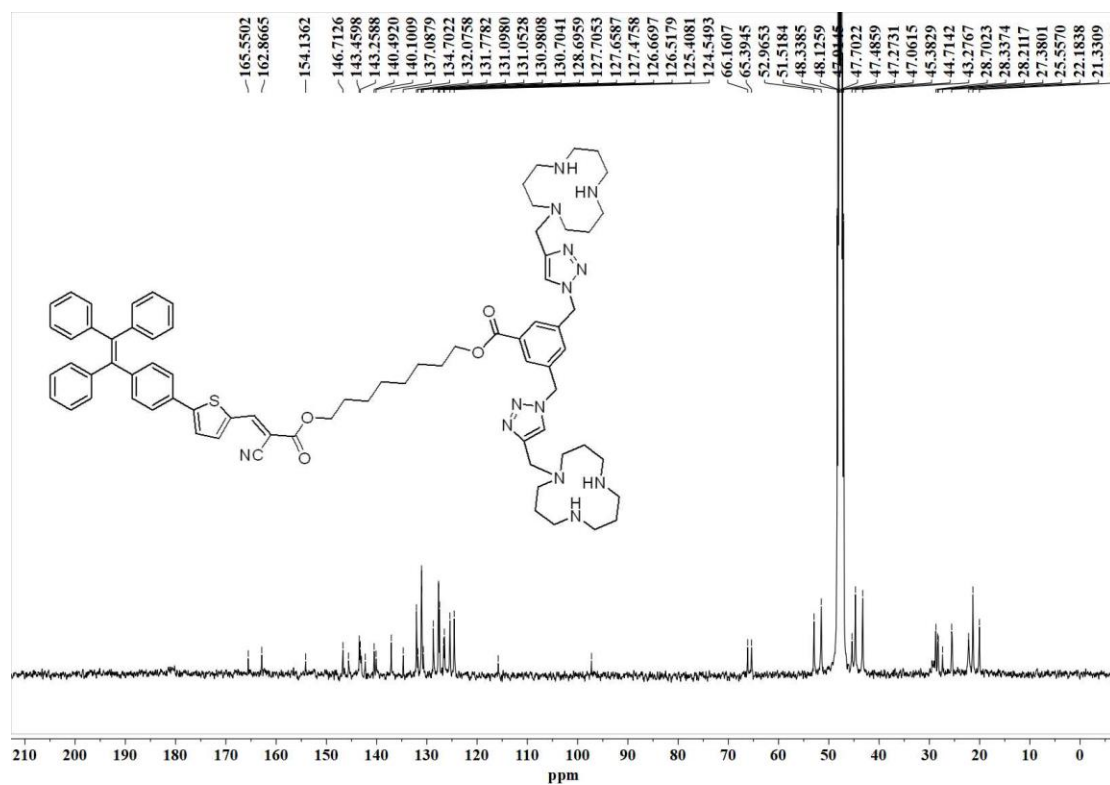

**Figure S85**  $^{13}\text{C}$  NMR spectrum of TTC-L-M-2 (151 MHz,  $\text{CD}_3\text{OD}$ )

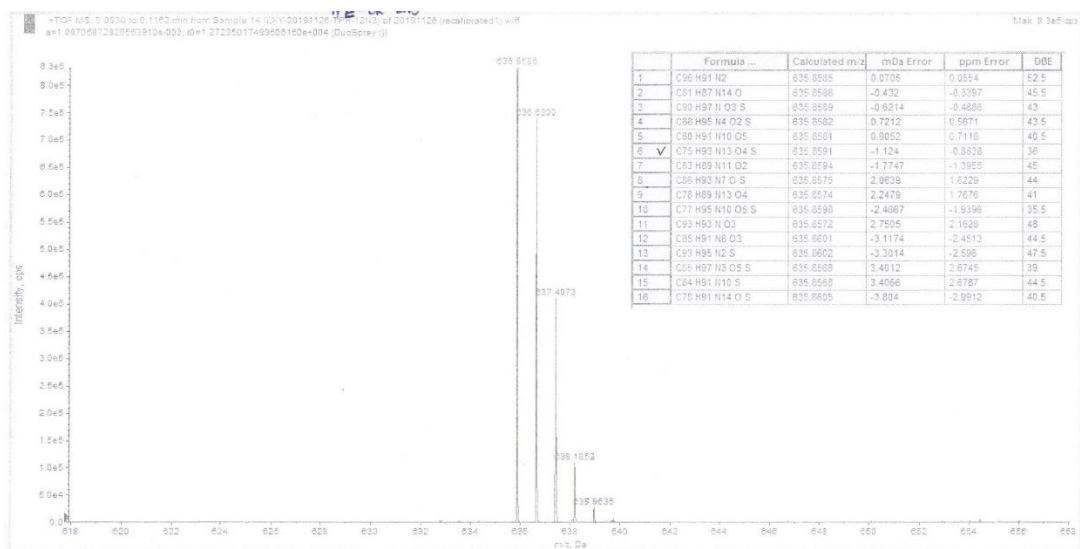

Figure S86 HR-MS spectrum of TTC-L-M-3.

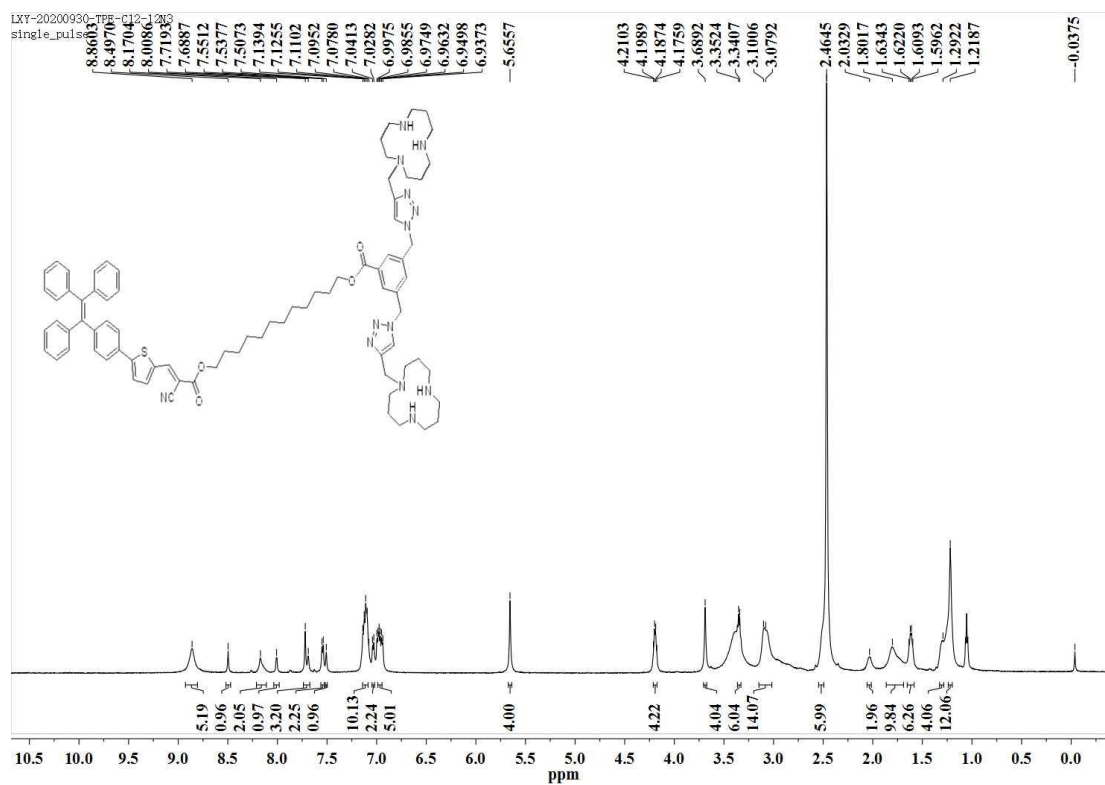

Figure S87 <sup>1</sup>H NMR spectrum of TTC-L-M-4 (600 MHz, DMSO-d<sub>6</sub>)

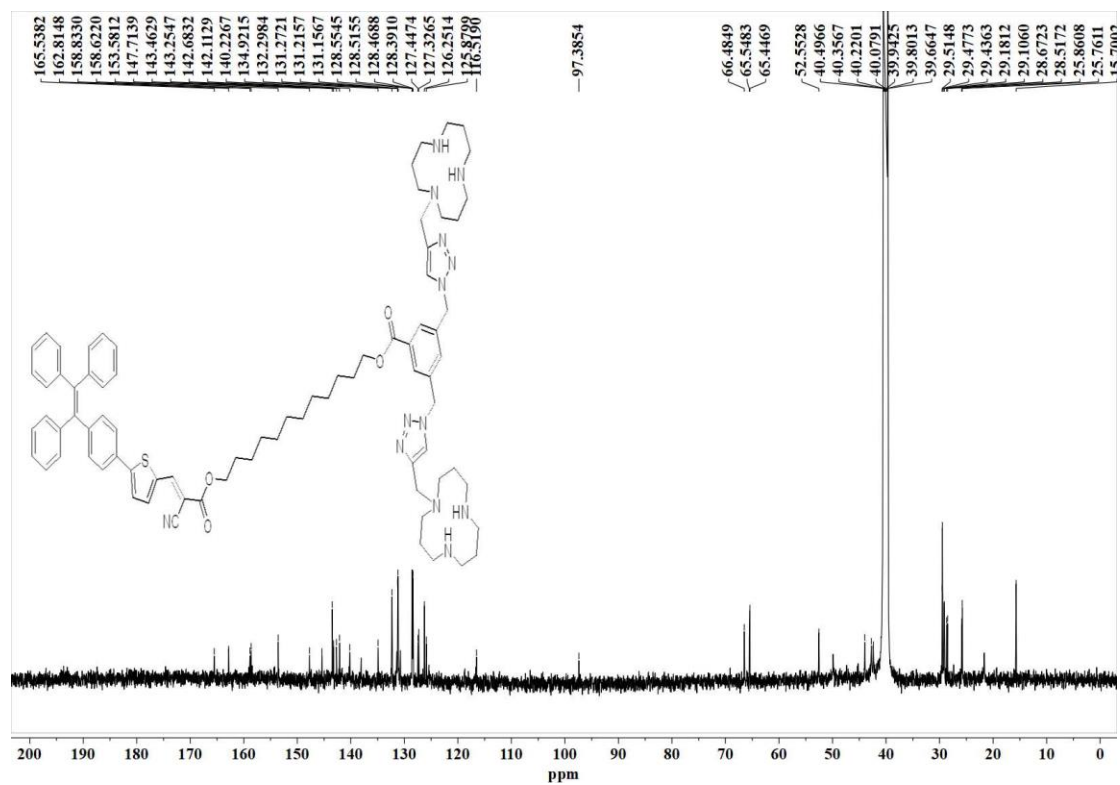

Figure S88  $^{13}\text{C}$  NMR spectrum of TTC-L-M-4 (151 MHz,  $\text{DMSO}-d_6$ )

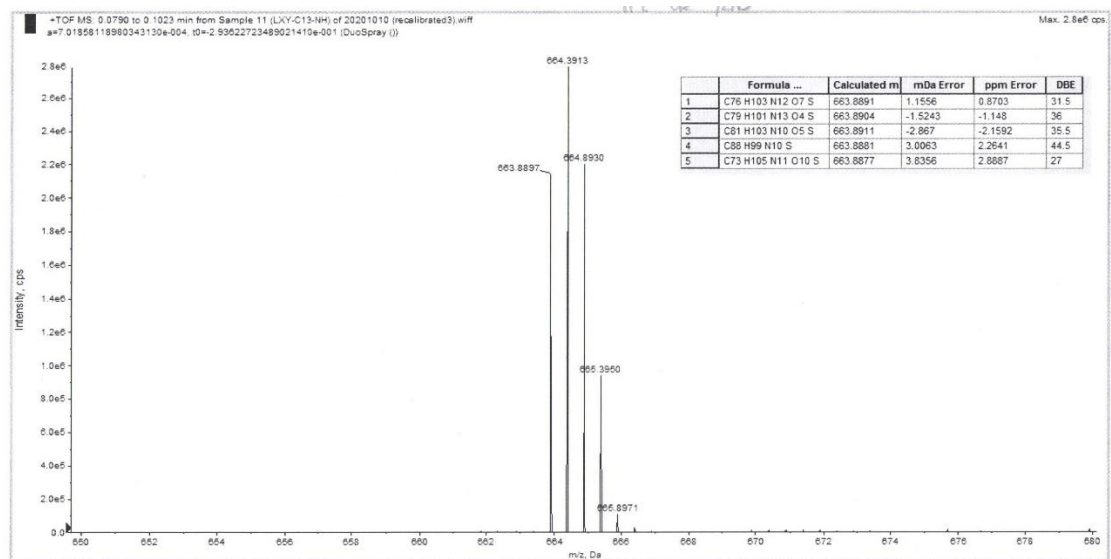

Figure S89 HR-MS spectrum of TTC-L-M-4.

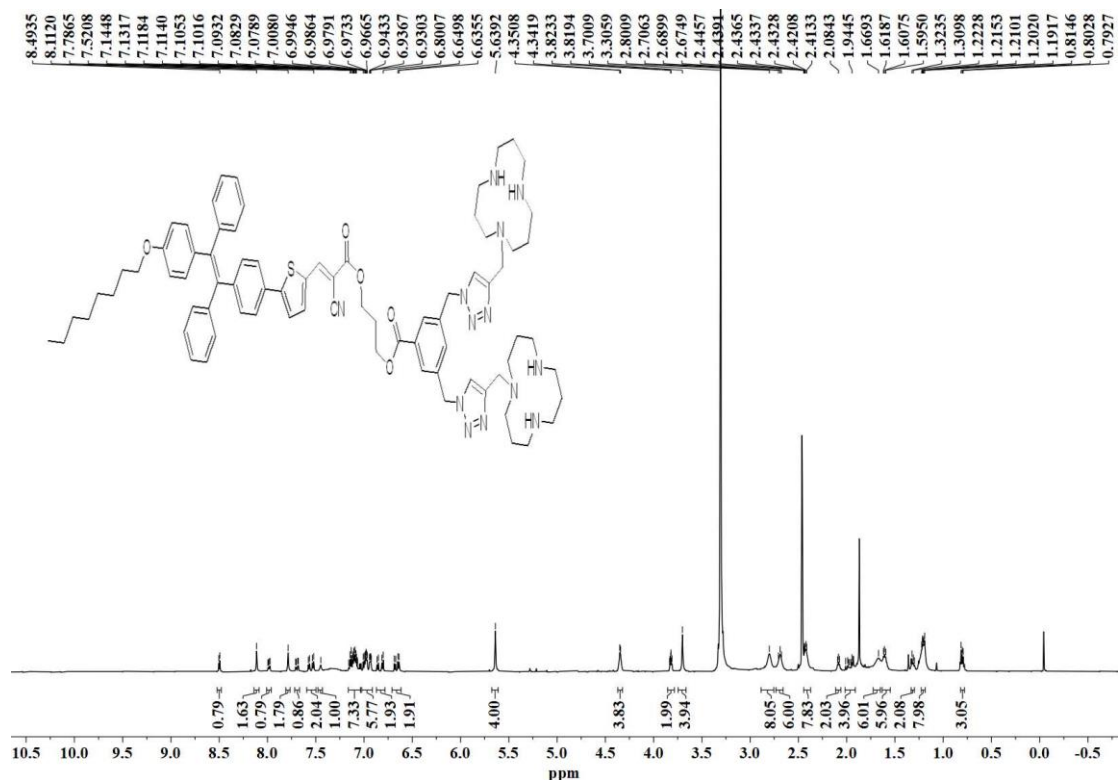

Figure S90  $^1\text{H}$  NMR spectrum of TTC-L-M-5 (600 MHz,  $\text{DMSO-}d_6$ )

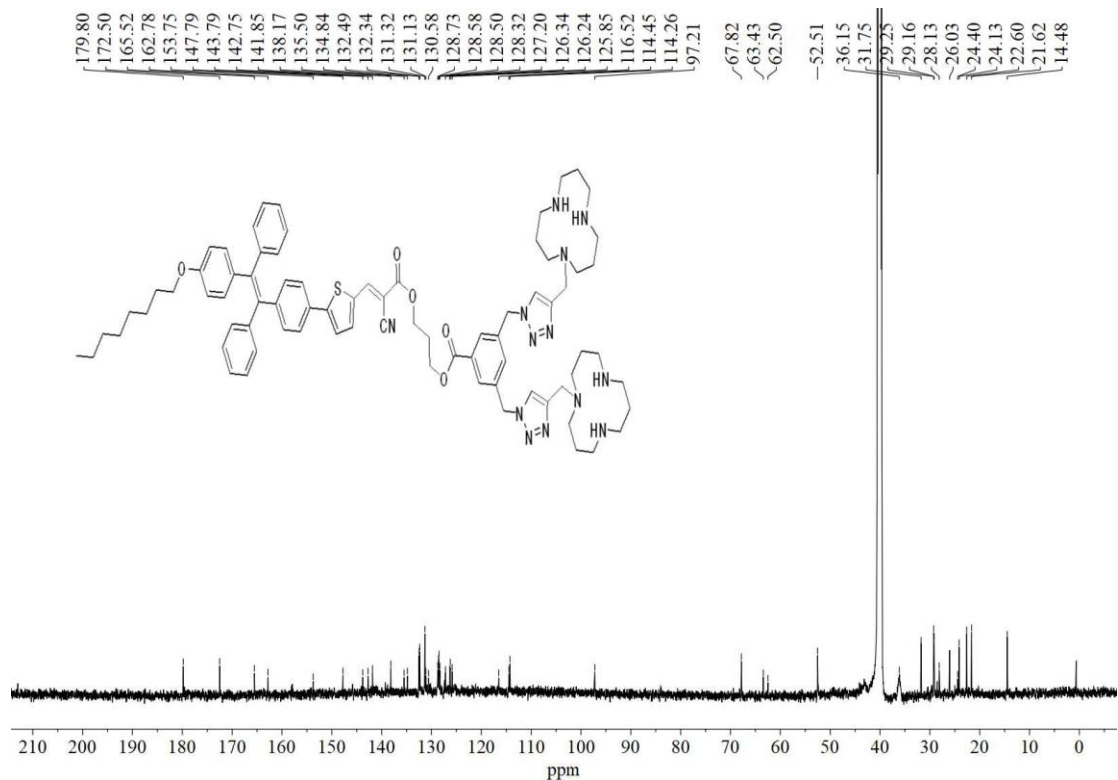

Figure S91  $^{13}\text{C}$  NMR spectrum of TTC-L-M-5 (151 MHz,  $\text{DMSO-}d_6$ )

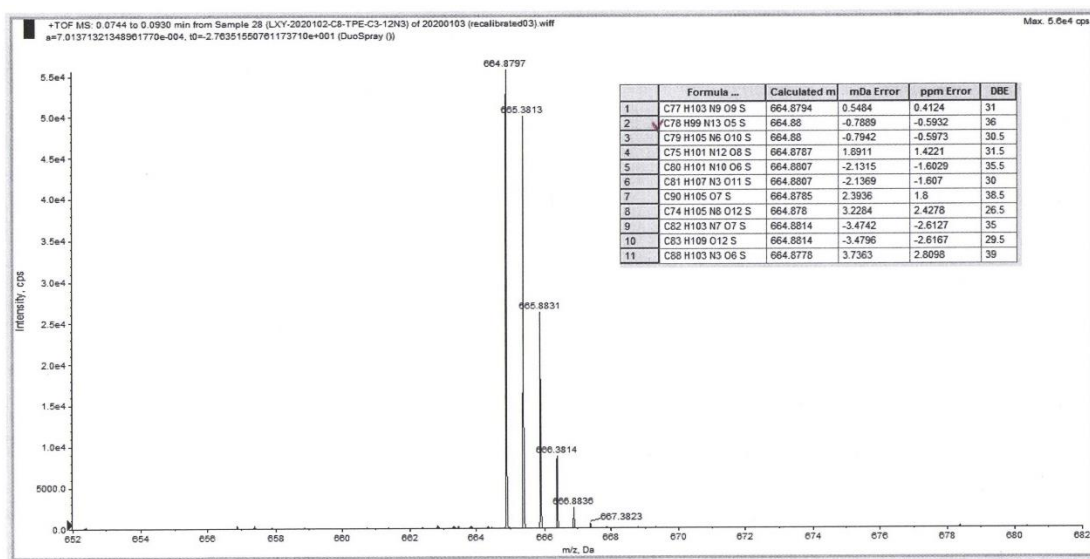

Figure S92 HR-MS spectrum of TTC-L-M-5.

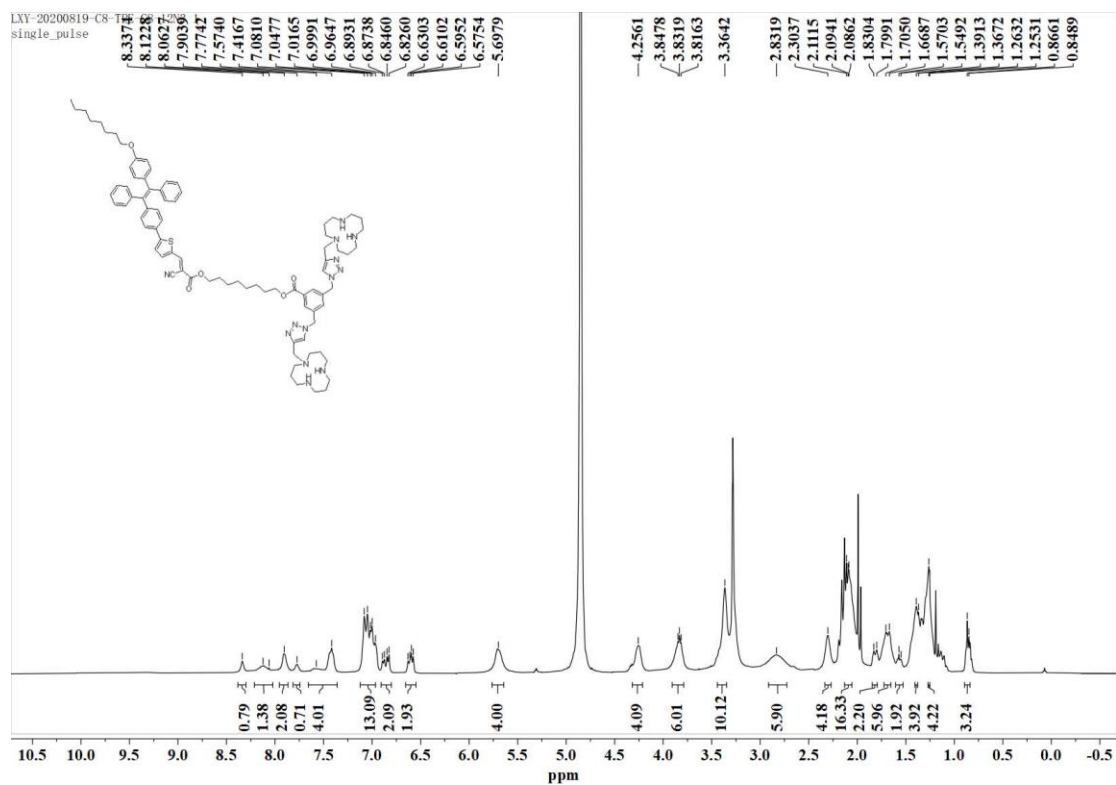

Figure S93 <sup>1</sup>H NMR spectrum of TTC-L-M-6 (400 MHz, CD<sub>3</sub>OD)



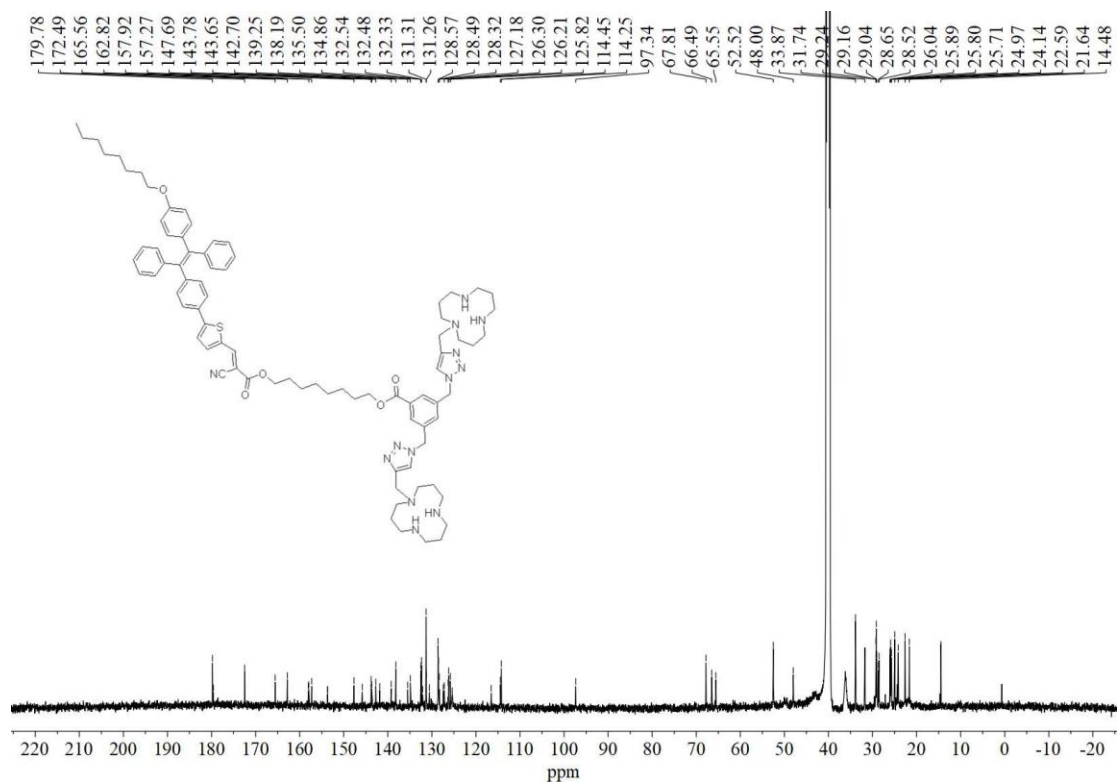

**Figure S94** <sup>13</sup>C NMR spectrum of TTC-L-M-6 (151 MHz, DMSO-*d*<sub>6</sub>)

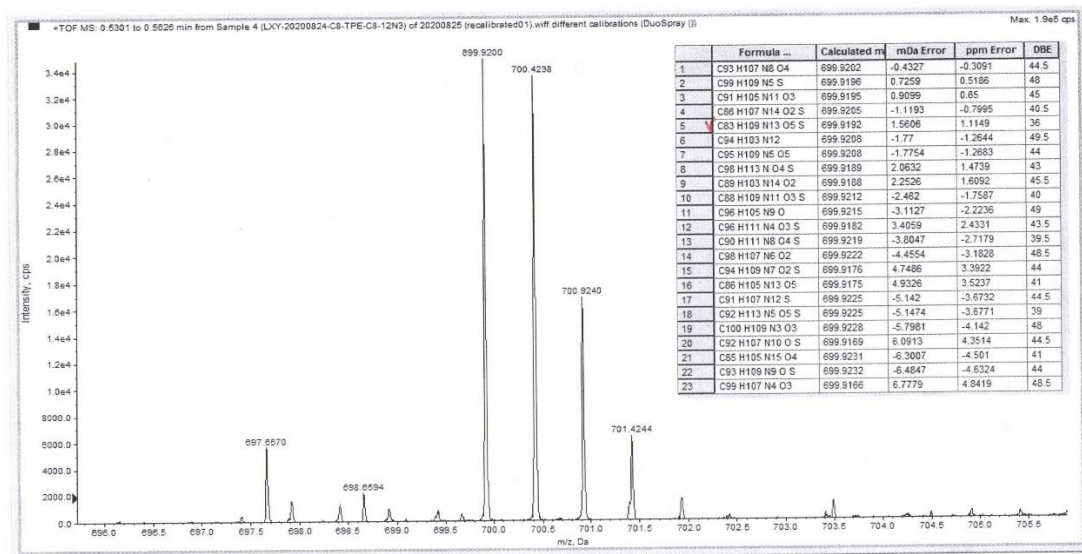

**Figure S95** HR-MS spectrum of TTC-L-M-6.

## References

- (1) Jiang, Y.; Duan, Q.; Zheng, G.; Yang, L.; Zhang, J.; Wang, Y.; Zhang, H.; He, J.; Sun, H.; Ho, D. An ultra-sensitive and ratiometric fluorescent probe based on the DTBET process for Hg<sup>2+</sup> detection and imaging applications. *Analyst* **2019**, *144*, 1353-1360.
- (2) Xiong, J.; Zheng, T. J.; Shi, Y.; Wei, F.; Ma, S. C.; He, L.; Wang, S. C.; Liu, X. S.

Analysis of the fingerprint profile of bioactive constituents of traditional Chinese medicinal materials derived from animal bile using the HPLC-ELSD and chemometric methods: An application of a reference scaleplate. *J. Pharm. Biomed. Anal.* **2019**, 174, 50.

(3) Liu, B.; Liu, J. Methods and compositions for near infrared fluorescent nanodots with aggregation-induced emission characteristics. US2019358350A1, 2019-11-28.
